# Supplementary material
Source: Research Square preprint supplement (doi:10.21203/rs.3.rs-9199614/v1)
Supplement: Supplementary file 1 [file 605e067547ba1be39f512c97.xlsx]

## Sheet: S1a_Subunit_Summary
Operon (hit_id)	Clade	Activase (assD/bssD)	β subunit (bssB)	γ subunit (bssC)	Radical SAM (assB/bssB)	bbsEF	bbsG	bbsB (thiolase)
000740865.1 / JPEC01000003.1_41	assA	pos -7,-6 (52.8%,54.3%)	—	—	—	—	—	—
002327235.1 / DCUX01000026.1_4	assA	—	—	—	—	—	—	—
002382685.1 / DFZH01000041.1_77	assA	pos -7,-6 (52.8%,54.3%)	—	—	—	—	—	—
003445555.1 / DMDI01000230.1_5	assA	—	—	—	—	—	—	—
054600955.1 / BAAHZT010000003.1_91	assA	pos +6,+7 (51.1%,52.4%)	—	—	—	—	—	—
054600955.1 / BAAHZT010000043.1_10	assA	—	—	—	—	—	—	—
054600955.1 / BAAHZT010000043.1_5	assA	—	—	—	—	—	—	—
002347425.1 / DDXD01000109.1_2	bssA	—	—	—	—	pos +2,+3 (49.9%,50.3%)	—	—
002382125.1 / DFZP01000060.1_3	bssA	—	—	—	—	—	—	—
002382755.1 / DFZT01000021.1_6	bssA	pos -5 (59.2%)	pos -3 (45.3%)	—	pos +4 (44.5%)	—	—	—
002418775.1 / DIEU01000024.1_68	bssA	pos -4,-2 (51.9%,49.8%)	—	—	—	pos -6 (51.5%)	pos -7 (53.6%)	—
002469335.1 / DKFI01000114.1_6	bssA	pos -5 (60.8%)	pos -3,-2 (43.4%,47.2%)	—	pos +3 (45.5%)	—	—	—
003445665.1 / DMCV01000086.1_10	bssA	pos +4 (54.7%)	pos +6 (39.7%)	—	—	—	—	—
003457075.1 / DMIY01000188.1_6	bssA	pos -5 (52.0%)	pos -3,-2 (43.4%,47.2%)	—	—	—	—	—
003485325.1 / DMZI01000037.1_101	bssA	pos -4 (60.5%)	pos -7,-6 (43.4%,45.3%)	—	—	—	—	—
003485325.1 / DMZI01000074.1_10	bssA	pos +3,+5 (43.6%,56.2%)	—	pos -1 (41.4%)	—	pos -3,-2 (50.6%,49.6%)	—	pos -6 (49.2%)
003513005.1 / DOTD01000068.1_4	bssA	pos +2,+4 (44.4%,55.9%)	—	—	—	—	—	—
041653135.1 / JBAZGB010000109.1_6	bssA	—	—	—	—	—	—	—

## Sheet: S1b_DIAMOND_Annotations
Operon	Clade	Pos	Gene	Subject	% id	Aln len	E-value	Bitscore	Description	Subunit?
740865	assA	-7	JPEC01000003.1_34	B8FF77	52.8	309	4.14e-112	333	Alkylsuccinate synthase (II) glycyl radical activating enzyme (AssD2')	assD/bssD activating enzyme
740865	assA	-6	JPEC01000003.1_35	B8FEM1	54.3	313	7.04e-129	375	Alkylsuccinate synthase (I) glycyl radical activating enzyme (AssD1)	assD/bssD activating enzyme
740865	assA	-5	JPEC01000003.1_36	A0A0V8M3G3	36.8	133	1.85e-19	84	Uncharacterized protein
740865	assA	-4	JPEC01000003.1_37	F6CLN3	36	111	9.13e-10	59	Pyridoxamine 5'-phosphate oxidase-related FMN-binding protein
740865	assA	+0	JPEC01000003.1_41	B8FEM4	46.3	834	1.3e-245	712	Alkylsuccinate synthase (I), alpha subunit (AssA1)
740865	assA	+1	JPEC01000003.1_42	E4TCS0	37.5	256	3.62e-34	129	Enoyl-CoA hydratase/isomerase
740865	assA	+2	JPEC01000003.1_43	M1IE41	40.4	267	1.88e-64	208	3-hydroxybutyryl-CoA dehydratase
740865	assA	+3	JPEC01000003.1_44	A0A075KH66	24.2	190	4.28e-11	71	Major facilitator superfamily MFS_1
740865	assA	+4	JPEC01000003.1_45	Q8RAJ6	45.5	593	2.08e-146	439	Methylmalonyl-CoA mutase, N-terminal domain/subunit
740865	assA	+5	JPEC01000003.1_46	A0A075KJS9	48.6	496	2.56e-153	452	Succinate CoA transferase
740865	assA	+6	JPEC01000003.1_47	B8NM29	37	359	5.45e-55	193	Uncharacterized protein
740865	assA	+7	JPEC01000003.1_48	F8D326	51.7	524	6.68e-174	506	Propionyl-CoA carboxylase
2.32724e+06	assA	-3	DCUX01000026.1_1	C5D9J3	57.4	101	8.38e-33	123	Acyl-CoA dehydrogenase domain protein
2.32724e+06	assA	-2	DCUX01000026.1_2	Q8RAJ6	48.4	533	3.44e-174	509	Methylmalonyl-CoA mutase, N-terminal domain/subunit
2.32724e+06	assA	-1	DCUX01000026.1_3	A5D2I7	57.9	133	6.66e-45	148	Methylmalonyl-CoA mutase, C-terminal domain/subunit
2.32724e+06	assA	+0	DCUX01000026.1_4	B8FEM4	51	823	2.31e-283	809	Alkylsuccinate synthase (I), alpha subunit (AssA1)
2.32724e+06	assA	+2	DCUX01000026.1_6	A0A1P8F560	35.3	139	8.85e-19	82	Uncharacterized protein
2.32724e+06	assA	+3	DCUX01000026.1_7	F4BW82	32.1	140	6.06e-09	57	Pyridoxamine 5'-phosphate oxidase-related, FMN-binding protein
2.32724e+06	assA	+4	DCUX01000026.1_8	Q8TH37	30.3	376	4e-41	156	Transposase
2.38269e+06	assA	-7	DFZH01000041.1_70	B8FF77	52.8	309	7.22e-113	335	Alkylsuccinate synthase (II) glycyl radical activating enzyme (AssD2')	assD/bssD activating enzyme
2.38269e+06	assA	-6	DFZH01000041.1_71	B8FEM1	54.3	313	7.04e-129	375	Alkylsuccinate synthase (I) glycyl radical activating enzyme (AssD1)	assD/bssD activating enzyme
2.38269e+06	assA	-5	DFZH01000041.1_72	A0A0V8M3G3	38.3	133	1.31e-19	85	Uncharacterized protein
2.38269e+06	assA	-4	DFZH01000041.1_73	F6CLN3	30.8	133	1.8e-09	58	Pyridoxamine 5'-phosphate oxidase-related FMN-binding protein
2.38269e+06	assA	+0	DFZH01000041.1_77	B8FEM4	46.2	834	3.67e-245	711	Alkylsuccinate synthase (I), alpha subunit (AssA1)
2.38269e+06	assA	+1	DFZH01000041.1_78	E4TCS0	37.5	256	3.62e-34	129	Enoyl-CoA hydratase/isomerase
2.38269e+06	assA	+2	DFZH01000041.1_79	M1IE41	40.1	267	3.76e-64	207	3-hydroxybutyryl-CoA dehydratase
2.38269e+06	assA	+3	DFZH01000041.1_80	A0A075KH66	24.2	190	3.21e-11	72	Major facilitator superfamily MFS_1
2.38269e+06	assA	+4	DFZH01000041.1_81	Q8RAJ6	44.9	592	9.38e-145	435	Methylmalonyl-CoA mutase, N-terminal domain/subunit
2.38269e+06	assA	+5	DFZH01000041.1_82	A0A075KJS9	48.6	496	1.28e-153	452	Succinate CoA transferase
2.38269e+06	assA	+6	DFZH01000041.1_83	Q0TZ02	29.5	441	4.23e-54	191	Uncharacterized protein
2.38269e+06	assA	+7	DFZH01000041.1_84	F8D326	51.5	524	4.72e-174	506	Propionyl-CoA carboxylase
3.44556e+06	assA	-4	DMDI01000230.1_1	A0A1Y3PCA1	61.8	68	2.77e-20	88	Acyl-CoA dehydrogenase
3.44556e+06	assA	-3	DMDI01000230.1_2	Q0W3H7	29.7	138	8.17e-09	57	Conserved pyridoxamine 5\'-phosphate oxidase-related protein
3.44556e+06	assA	-2	DMDI01000230.1_3	A0A1P8FA28	37	135	6.11e-19	83	Uncharacterized protein
3.44556e+06	assA	+0	DMDI01000230.1_5	B8FEM4	51	827	2.69e-287	819	Alkylsuccinate synthase (I), alpha subunit (AssA1)
3.44556e+06	assA	+1	DMDI01000230.1_6	A0A290XDX3	36	267	9.09e-37	136	Enoyl-CoA hydratase
3.44556e+06	assA	+2	DMDI01000230.1_7	M1IE41	39.7	267	5.84e-66	212	3-hydroxybutyryl-CoA dehydratase
3.44556e+06	assA	+3	DMDI01000230.1_8	A0A075KH66	27.4	168	3.11e-13	78	Major facilitator superfamily MFS_1
3.44556e+06	assA	+4	DMDI01000230.1_9	Q8RAJ6	48.3	437	1.22e-116	358	Methylmalonyl-CoA mutase, N-terminal domain/subunit
5.4601e+07	assA	-7	BAAHZT010000003.1_84	F8D326	50.6	524	2.69e-173	504	Propionyl-CoA carboxylase
5.4601e+07	assA	-6	BAAHZT010000003.1_85	Q0TZ02	29.9	441	2.86e-55	194	Uncharacterized protein
5.4601e+07	assA	-5	BAAHZT010000003.1_86	A0A075KJS9	49.2	496	5.27e-158	464	Succinate CoA transferase
5.4601e+07	assA	-4	BAAHZT010000003.1_87	Q8RAJ6	44.9	586	6.5e-148	443	Methylmalonyl-CoA mutase, N-terminal domain/subunit
5.4601e+07	assA	-3	BAAHZT010000003.1_88	A0A075KH66	28	164	9.96e-13	76	Major facilitator superfamily MFS_1
5.4601e+07	assA	-2	BAAHZT010000003.1_89	M1IE41	39.3	267	5.84e-66	212	3-hydroxybutyryl-CoA dehydratase
5.4601e+07	assA	-1	BAAHZT010000003.1_90	M4V7D9	35.1	262	7.33e-37	137	Uncharacterized protein
5.4601e+07	assA	+0	BAAHZT010000003.1_91	B8FEM4	46.3	827	1.04e-244	710	Alkylsuccinate synthase (I), alpha subunit (AssA1)
5.4601e+07	assA	+4	BAAHZT010000003.1_95	F6CLN3	33.1	133	2.76e-12	66	Pyridoxamine 5'-phosphate oxidase-related FMN-binding protein
5.4601e+07	assA	+5	BAAHZT010000003.1_96	A0A0V8M3G3	39.1	133	9.28e-20	85	Uncharacterized protein
5.4601e+07	assA	+6	BAAHZT010000003.1_97	B8FEM1	51.1	313	6.79e-122	358	Alkylsuccinate synthase (I) glycyl radical activating enzyme (AssD1)	assD/bssD activating enzyme
5.4601e+07	assA	+7	BAAHZT010000003.1_98	B8FF77	52.4	309	2.28e-114	339	Alkylsuccinate synthase (II) glycyl radical activating enzyme (AssD2')	assD/bssD activating enzyme
5.4601e+07	assA	-7	BAAHZT010000043.1_3	Q96YS7	52.6	137	4.45e-42	142	Methylmalonyl-CoA mutase small subunit
5.4601e+07	assA	-5	BAAHZT010000043.1_5	B8FEM4	50.3	823	3.66e-277	793	Alkylsuccinate synthase (I), alpha subunit (AssA1)
5.4601e+07	assA	-3	BAAHZT010000043.1_7	A0A1P8F560	34.5	139	1.4e-17	79	Uncharacterized protein
5.4601e+07	assA	-2	BAAHZT010000043.1_8	A0A0V8M3G3	36.8	144	1.65e-20	87	Uncharacterized protein
5.4601e+07	assA	+0	BAAHZT010000043.1_10	B8FEM4	73.5	825	0	1326	Alkylsuccinate synthase (I), alpha subunit (AssA1)
5.4601e+07	assA	-4	BAAHZT010000043.1_1	A4IMI9	58.6	157	2.07e-59	194	Probable acyl-coA dehydrogenase
5.4601e+07	assA	-3	BAAHZT010000043.1_2	A0A0F8VCW2	45.9	529	9.97e-171	500	Methylmalonyl-CoA mutase
5.4601e+07	assA	-2	BAAHZT010000043.1_3	Q96YS7	52.6	137	4.45e-42	142	Methylmalonyl-CoA mutase small subunit
5.4601e+07	assA	+0	BAAHZT010000043.1_5	B8FEM4	50.3	823	3.66e-277	793	Alkylsuccinate synthase (I), alpha subunit (AssA1)
5.4601e+07	assA	+2	BAAHZT010000043.1_7	A0A1P8F560	34.5	139	1.4e-17	79	Uncharacterized protein
5.4601e+07	assA	+3	BAAHZT010000043.1_8	A0A0V8M3G3	36.8	144	1.65e-20	87	Uncharacterized protein
5.4601e+07	assA	+5	BAAHZT010000043.1_10	B8FEM4	73.5	825	0	1326	Alkylsuccinate synthase (I), alpha subunit (AssA1)
2.34743e+06	bssA	-1	DDXD01000109.1_1	E1YFQ8	43.3	67	1.52e-16	72	Uncharacterized protein
2.34743e+06	bssA	+0	DDXD01000109.1_2	D2XBH8	56.7	822	0	920	Putative naphthyl-2-methyl-succinate synthase alpha subunit (Fragment)
2.34743e+06	bssA	+2	DDXD01000109.1_4	K0NH37	49.9	405	2.22e-136	402	BbsF: benzylsuccinate CoA-transferase, subunit	bbsEF (CoA transferase)
2.34743e+06	bssA	+3	DDXD01000109.1_5	B9LZZ3	50.3	380	4.87e-134	395	Succinyl:(R)-benzylsuccinate coenzyme A transferase subunit	bbsEF (CoA transferase)
2.38213e+06	bssA	-2	DFZP01000060.1_1	A0L945	51.3	119	2.9e-34	129	RNA-directed DNA polymerase (Reverse transcriptase)
2.38213e+06	bssA	+0	DFZP01000060.1_3	D2XBH8	68.7	814	0	1182	Putative naphthyl-2-methyl-succinate synthase alpha subunit (Fragment)
2.38276e+06	bssA	-5	DFZT01000021.1_1	R4KAJ9	59.2	314	1.38e-127	374	Glycyl-radical enzyme activator family protein	assD/bssD activating enzyme
2.38276e+06	bssA	-3	DFZT01000021.1_3	I6LHT9	45.3	53	6.44e-11	59	Beta subunit of benzylsuccinate synthase	bssB (β subunit)
2.38276e+06	bssA	-1	DFZT01000021.1_5	E1YFR0	61.7	60	5.95e-22	85	Uncharacterized protein
2.38276e+06	bssA	+0	DFZT01000021.1_6	R4KCB7	77.1	862	0	1407	Pyruvate-formate lyase
2.38276e+06	bssA	+1	DFZT01000021.1_7	R4KI65	75.7	70	2.69e-37	125	Uncharacterized protein
2.38276e+06	bssA	+2	DFZT01000021.1_8	R4KKQ2	74.2	62	4.01e-25	102	ATPase family protein associated with various cellular activities (AAA)
2.38276e+06	bssA	+3	DFZT01000021.1_9	A0A1H2UMH8	32.3	347	3.03e-45	164	Heme b synthase
2.38276e+06	bssA	+4	DFZT01000021.1_10	D3S2N8	44.5	364	1.77e-105	321	Radical SAM domain protein	Radical SAM (assB/bssB)
2.38276e+06	bssA	+5	DFZT01000021.1_11	A5D167	87.9	257	8.91e-159	446	RNA polymerase sigma factor
2.38276e+06	bssA	+6	DFZT01000021.1_12	F6CIU3	45.6	195	2.78e-49	168	Stage II sporulation protein R
2.41878e+06	bssA	-7	DIEU01000024.1_61	B9LZZ5	53.6	403	1.49e-148	432	(R)-benzylsuccinyl-CoA dehydrogenase	bbsG (CoA dehydrogenase)
2.41878e+06	bssA	-6	DIEU01000024.1_62	Q39VG8	51.5	404	3.26e-141	414	Succinyl:(R)-benzylsuccinate coenzyme A transferase subunit	bbsEF (CoA transferase)
2.41878e+06	bssA	-5	DIEU01000024.1_63	E1YFR8	47.8	404	5.69e-126	376	Uncharacterized protein
2.41878e+06	bssA	-4	DIEU01000024.1_64	K0NCR9	51.9	324	5.2e-126	370	HbsD1: hydroxybenzylsuccinate synthase activating enzyme	assD/bssD activating enzyme
2.41878e+06	bssA	-2	DIEU01000024.1_66	R4KAI9	49.8	301	1.12e-89	275	Glycyl-radical enzyme activator family protein	assD/bssD activating enzyme
2.41878e+06	bssA	+0	DIEU01000024.1_68	D2XBH8	56.2	828	0	909	Putative naphthyl-2-methyl-succinate synthase alpha subunit (Fragment)
2.41878e+06	bssA	+2	DIEU01000024.1_70	R4KKQ2	59.2	284	4.68e-121	353	ATPase family protein associated with various cellular activities (AAA)
2.41878e+06	bssA	+4	DIEU01000024.1_72	F7V3U2	58.1	391	2.4e-154	446	Acetyl-CoA acetyltransferase
2.41878e+06	bssA	+5	DIEU01000024.1_73	F6CJT8	61.2	67	2.33e-21	87	MaoC domain protein dehydratase
2.41878e+06	bssA	+6	DIEU01000024.1_74	A5D2I8	36.8	136	2.64e-20	86	Methylmalonyl-CoA epimerase
2.41878e+06	bssA	+7	DIEU01000024.1_75	R4KCA3	66	247	1.65e-113	331	Uncharacterized protein
2.46934e+06	bssA	-5	DKFI01000114.1_1	R4KAJ9	60.8	314	5.07e-132	385	Glycyl-radical enzyme activator family protein	assD/bssD activating enzyme
2.46934e+06	bssA	-3	DKFI01000114.1_3	I6LHT9	43.4	53	1.05e-09	56	Beta subunit of benzylsuccinate synthase	bssB (β subunit)
2.46934e+06	bssA	-2	DKFI01000114.1_4	I6LHT9	47.2	53	5.98e-10	56	Beta subunit of benzylsuccinate synthase	bssB (β subunit)
2.46934e+06	bssA	-1	DKFI01000114.1_5	E1YFR0	63.3	60	3.58e-23	88	Uncharacterized protein
2.46934e+06	bssA	+0	DKFI01000114.1_6	R4KCB7	76.6	862	0	1409	Pyruvate-formate lyase
2.46934e+06	bssA	+1	DKFI01000114.1_7	R4KI65	74.6	71	2.7e-35	120	Uncharacterized protein
2.46934e+06	bssA	+2	DKFI01000114.1_8	A0A1H2UMH8	32.3	347	1.54e-45	165	Heme b synthase
2.46934e+06	bssA	+3	DKFI01000114.1_9	D3S2N8	45.5	365	2.1e-101	310	Radical SAM domain protein	Radical SAM (assB/bssB)
2.46934e+06	bssA	+4	DKFI01000114.1_10	A5D167	87.9	257	3.63e-158	445	RNA polymerase sigma factor
2.46934e+06	bssA	+5	DKFI01000114.1_11	F6CIU3	42.7	234	1.3e-52	178	Stage II sporulation protein R
3.44567e+06	bssA	-7	DMCV01000086.1_3	F5YLL7	44.2	242	6.18e-61	211	O-acetylhomoserine (Thiol)-lyase (O-acetylhomoserinesulfhydrylase) (OAH sulfh...
3.44567e+06	bssA	-5	DMCV01000086.1_5	T0IAC7	70	687	0	974	DNA topoisomerase III
3.44567e+06	bssA	-4	DMCV01000086.1_6	B8GIN0	40	310	3.65e-74	236	Beta-lactamase domain protein
3.44567e+06	bssA	-3	DMCV01000086.1_7	I7A1I2	51.3	226	4.97e-71	229	Iron-sulfur cluster carrier protein
3.44567e+06	bssA	-2	DMCV01000086.1_8	Q2RKI4	55.7	472	3.57e-180	520	Amino acid/polyamine/organocation transporter, APC superfamily
3.44567e+06	bssA	-1	DMCV01000086.1_9	E1YFR0	63.3	60	6.96e-21	82	Uncharacterized protein
3.44567e+06	bssA	+0	DMCV01000086.1_10	R4KCB7	76.9	862	0	1406	Pyruvate-formate lyase
3.44567e+06	bssA	+1	DMCV01000086.1_11	R4KI65	73.2	71	6.35e-34	117	Uncharacterized protein
3.44567e+06	bssA	+2	DMCV01000086.1_12	R4KKQ2	74.7	281	7.42e-157	444	ATPase family protein associated with various cellular activities (AAA)
3.44567e+06	bssA	+4	DMCV01000086.1_14	R4KAJ9	54.7	212	3.9e-76	238	Glycyl-radical enzyme activator family protein	assD/bssD activating enzyme
3.44567e+06	bssA	+6	DMCV01000086.1_16	I6LHT9	39.7	68	4.39e-11	59	Beta subunit of benzylsuccinate synthase	bssB (β subunit)
3.44567e+06	bssA	+7	DMCV01000086.1_17	K0NCD2	67.4	43	7.04e-12	65	BssA: benzylsuccinate synthase, alpha subunit
3.45708e+06	bssA	-5	DMIY01000188.1_1	R4KAJ9	52	100	1.61e-26	105	Glycyl-radical enzyme activator family protein	assD/bssD activating enzyme
3.45708e+06	bssA	-3	DMIY01000188.1_3	I6LHT9	43.4	53	1.05e-09	56	Beta subunit of benzylsuccinate synthase	bssB (β subunit)
3.45708e+06	bssA	-2	DMIY01000188.1_4	I6LHT9	47.2	53	5.98e-10	56	Beta subunit of benzylsuccinate synthase	bssB (β subunit)
3.45708e+06	bssA	-1	DMIY01000188.1_5	E1YFR0	65	60	1.03e-22	87	Uncharacterized protein
3.45708e+06	bssA	+0	DMIY01000188.1_6	R4KCB7	74.3	709	0	1135	Pyruvate-formate lyase
3.48533e+06	bssA	-7	DMZI01000037.1_94	I6LHT9	43.4	53	3.27e-07	49	Beta subunit of benzylsuccinate synthase	bssB (β subunit)
3.48533e+06	bssA	-6	DMZI01000037.1_95	I6LHT9	45.3	53	2.69e-10	57	Beta subunit of benzylsuccinate synthase	bssB (β subunit)
3.48533e+06	bssA	-4	DMZI01000037.1_97	R4KAJ9	60.5	314	2.34e-132	386	Glycyl-radical enzyme activator family protein	assD/bssD activating enzyme
3.48533e+06	bssA	-2	DMZI01000037.1_99	R4KKQ2	74.7	281	2.13e-156	442	ATPase family protein associated with various cellular activities (AAA)
3.48533e+06	bssA	-1	DMZI01000037.1_100	R4KI65	74.6	71	1.56e-34	118	Uncharacterized protein
3.48533e+06	bssA	+0	DMZI01000037.1_101	R4KCB7	76.6	862	0	1406	Pyruvate-formate lyase
3.48533e+06	bssA	+1	DMZI01000037.1_102	E1YFR0	61.7	60	2.84e-20	81	Uncharacterized protein
3.48533e+06	bssA	-7	DMZI01000074.1_3	R4KCC3	57.6	139	3.77e-48	157	Putative nucleic-acid-binding protein containing a Zn-ribbon
3.48533e+06	bssA	-6	DMZI01000074.1_4	B9M001	49.2	386	5.59e-117	351	Benzoylsuccinyl-CoA thiolase subunit	bbsB (CoA thiolase)
3.48533e+06	bssA	-5	DMZI01000074.1_5	R4KKQ7	58.4	250	1.08e-105	311	Uncharacterized protein
3.48533e+06	bssA	-4	DMZI01000074.1_6	R4KEX5	65.2	247	1.58e-113	331	Uncharacterized protein
3.48533e+06	bssA	-3	DMZI01000074.1_7	B9LZZ3	50.6	405	7.75e-145	423	Succinyl:(R)-benzylsuccinate coenzyme A transferase subunit	bbsEF (CoA transferase)
3.48533e+06	bssA	-2	DMZI01000074.1_8	K0NH37	49.6	405	2.36e-133	394	BbsF: benzylsuccinate CoA-transferase, subunit	bbsEF (CoA transferase)
3.48533e+06	bssA	-1	DMZI01000074.1_9	K0NC20	41.4	58	1.83e-09	54	BssC: benzylsuccinate synthase, gamma subunit	bssC (γ subunit)
3.48533e+06	bssA	+0	DMZI01000074.1_10	D2XBH8	56.6	822	0	918	Putative naphthyl-2-methyl-succinate synthase alpha subunit (Fragment)
3.48533e+06	bssA	+1	DMZI01000074.1_11	E1YFQ8	44.8	67	1.31e-17	75	Uncharacterized protein
3.48533e+06	bssA	+2	DMZI01000074.1_12	E1YFQ8	44.8	67	1.31e-17	75	Uncharacterized protein
3.48533e+06	bssA	+3	DMZI01000074.1_13	K0NI57	43.6	342	2.9e-99	301	HbsD2: hydroxybenzylsuccinate synthase activating enzyme	assD/bssD activating enzyme
3.48533e+06	bssA	+5	DMZI01000074.1_15	K0NCR9	56.2	324	2.71e-133	389	HbsD1: hydroxybenzylsuccinate synthase activating enzyme	assD/bssD activating enzyme
3.51301e+06	bssA	-3	DOTD01000068.1_1	F6CJK4	74.5	506	5.9e-286	795	Acetate--CoA ligase
3.51301e+06	bssA	-2	DOTD01000068.1_2	Q07JI8	68.6	188	2.09e-89	266	GPR1/FUN34/yaaH family protein
3.51301e+06	bssA	+0	DOTD01000068.1_4	D2XBH8	55.9	821	0	914	Putative naphthyl-2-methyl-succinate synthase alpha subunit (Fragment)
3.51301e+06	bssA	+1	DOTD01000068.1_5	E1YFQ8	46.3	67	1.31e-17	75	Uncharacterized protein
3.51301e+06	bssA	+2	DOTD01000068.1_6	K0NI57	44.4	342	3.31e-98	299	HbsD2: hydroxybenzylsuccinate synthase activating enzyme	assD/bssD activating enzyme
3.51301e+06	bssA	+4	DOTD01000068.1_8	K0NCR9	55.9	324	2.2e-132	386	HbsD1: hydroxybenzylsuccinate synthase activating enzyme	assD/bssD activating enzyme
3.51301e+06	bssA	+7	DOTD01000068.1_11	F6DTZ1	59	83	3.31e-27	101	Spore coat peptide assembly protein cotJB
4.16531e+07	bssA	-5	JBAZGB010000109.1_1	T0I8E3	67.7	62	7.7e-26	96	Mobile element protein
4.16531e+07	bssA	-3	JBAZGB010000109.1_3	A0A127F7P4	34.8	287	7.42e-41	154	General secretion pathway protein A
4.16531e+07	bssA	+0	JBAZGB010000109.1_6	D2XBH8	57.4	822	0	913	Putative naphthyl-2-methyl-succinate synthase alpha subunit (Fragment)

## Sheet: S2a_Genome_Stats
Accession	Genus	Compl. (%)	Contam. (%)	Size (Mb)	GC	N50 (kb)	CDS	Coding density
GCA_000681355.2	SCADC1-2-3	89.8	3.8	2.59	0.43	23.4	2925	0.84
GCA_000740805.1	SCADC1-2-3	69.3	1.5	1.86	0.43	26.2	2137	0.84
GCA_000740855.1	SCADC1-2-3	49.9	2	1.17	0.43	12.8	1386	0.844
GCA_000740865.1	SCADC1-2-3	70.5	3.5	1.7	0.43	19.4	1956	0.841
GCA_002327235.1	SCADC1-2-3	96.6	0.1	2.21	0.43	70.6	2195	0.866
GCA_002382685.1	SCADC1-2-3	92.3	1.1	1.8	0.42	12.5	1981	0.854
GCA_002402825.1	SCADC1-2-3	86.8	0.2	1.82	0.42	87.1	1895	0.867
GCA_002403265.1	SCADC1-2-3	96	1.2	2.18	0.43	84	2190	0.865
GCA_002423065.1	SCADC1-2-3	93.9	0.1	2.24	0.43	48.6	2368	0.855
GCA_003445555.1	SCADC1-2-3	70.4	0.3	1.69	0.43	6	1926	0.852
GCA_003529665.1	SCADC1-2-3	74.1	1.7	1.34	0.42	7.6	1504	0.82
GCA_003535365.1	SCADC1-2-3	77.1	1	1.54	0.43	8.6	1766	0.864
GCA_054600955.1	SCADC1-2-3	98	0.8	2.39	0.43	63.7	2440	0.846
GCA_001508995.1	46-80	90.1	5.5	2.25	0.46	35.2	2225	0.875
GCA_001509075.1	46-80	61.2	4.2	0.71	0.45	67	761	0.894
GCA_002347425.1	46-80	89.2	3.5	1.82	0.46	11	1939	0.881
GCA_002382755.1	46-80	92.9	0.6	1.82	0.46	27.6	1865	0.86
GCA_002418775.1	46-80	92.2	0.2	2.1	0.46	41.6	2068	0.865
GCA_002421505.1	46-80	91.4	0.4	2.48	0.46	22.8	2604	0.855
GCA_002441385.1	46-80	96.8	1	2.08	0.46	20.7	2146	0.867
GCA_002452655.1	46-80	79.3	3.5	2.46	0.45	14	2662	0.863
GCA_002469335.1	46-80	94.3	2.9	2.1	0.46	19.6	2178	0.851
GCA_003445665.1	46-80	96.7	1.9	2.54	0.46	44.7	2528	0.863
GCA_003485325.1	46-80	94.5	3.7	2.12	0.46	42.3	2127	0.847
GCA_003513005.1	46-80	96.9	1.1	2.49	0.46	52.5	2490	0.861
GCA_041653135.1	46-80	94.8	3.9	2.91	0.46	32	3109	0.866
GCA_020725585.1	JAIMBK01	83.1	1.6	2.37	0.54	33.6	2391	0.881
GCA_023511535.1	JAIMBK01	91.5	3.2	3.18	0.55	41.1	3232	0.856
GCA_036822475.1	JAIMBK01	80.5	0.4	2.39	0.55	5.7	2776	0.842
GCA_040753275.1	JAIMBK01	68.5	2.5	2.1	0.56	5.3	2376	0.865
GCA_040755215.1	JAIMBK01	88.7	1.3	3.45	0.55	32.5	3530	0.861
GCA_040755975.1	JAIMBK01	92.8	1.7	3.24	0.55	27.6	3322	0.858
GCA_002382125.1	UBA4053	62	0.1	1.23	0.47	18	1275	0.833
GCA_003457075.1	UBA4053	64.5	0.9	1.11	0.49	5.8	1198	0.885

## Sheet: S2b_Genus_Summary
Genus	n	Compl. (%)	Contam. (%)	Size (Mb)	GC	N50 (kb)	CDS
SCADC1-2-3	13	81.9	1.3	1.9	0.428	36.2	2051
46-80	13	90.0	2.5	2.1	0.458	33.2	2208
JAIMBK01	6	84.2	1.8	2.8	0.550	24.3	2938
UBA4053	2	63.2	0.5	1.2	0.480	11.9	1236

## Sheet: S3_ANI_Matrix
Genome	Genus	GCA_000681355.2	GCA_000740805.1	GCA_000740855.1	GCA_000740865.1	GCA_001508995.1	GCA_001509075.1	GCA_002327235.1	GCA_002347425.1	GCA_002382125.1	GCA_002382685.1	GCA_002382755.1	GCA_002402825.1	GCA_002403265.1	GCA_002418775.1	GCA_002421505.1	GCA_002423065.1	GCA_002441385.1	GCA_002452655.1	GCA_002469335.1	GCA_003445555.1	GCA_003445665.1	GCA_003457075.1	GCA_003485325.1	GCA_003513005.1	GCA_003529665.1	GCA_003535365.1	GCA_020725585.1	GCA_023511535.1	GCA_036822475.1	GCA_040753275.1	GCA_040755215.1	GCA_040755975.1	GCA_041653135.1	GCA_054600955.1
GCA_000681355.2	SCADC1-2-3	100	99.78	99.79	99.83	0	0	86.31	0	0	99.3	0	90.78	86.29	0	0	99.01	0	0	0	89.54	0	0	0	0	99.18	98.75	0	0	0	0	0	0	0	88.98
GCA_000740805.1	SCADC1-2-3	99.78	100	98.6	98.42	0	0	86.54	0	0	99.02	0	90.83	86.61	0	0	99.16	0	0	0	89.28	0	0	0	0	99.24	98.58	0	0	0	0	0	0	0	88.77
GCA_000740855.1	SCADC1-2-3	99.79	98.6	100	99.41	0	0	86.79	0	0	98.46	0	91.1	86.88	0	0	98.75	0	0	0	86.9	0	0	0	0	97.92	98.09	0	0	0	0	0	0	0	89.48
GCA_000740865.1	SCADC1-2-3	99.83	98.42	99.41	100	0	0	87.25	0	0	98.26	0	90.71	87.21	0	0	98.9	0	0	0	89.73	0	0	0	0	99.06	98.51	0	0	0	0	0	0	0	89.25
GCA_001508995.1	46-80	0	0	0	0	100	96.87	0	85.95	0	0	86.11	0	0	90.53	90.42	0	86.04	98.96	86.29	0	99.38	0	87.03	99.62	0	0	0	0	0	0	0	0	86.49	0
GCA_001509075.1	46-80	0	0	0	0	96.87	100	0	84.64	0	0	85.86	0	0	89.93	89.6	0	85.49	97	85.7	0	97.27	0	90.8	97.1	0	0	0	0	0	0	0	0	86.89	0
GCA_002327235.1	SCADC1-2-3	86.31	86.54	86.79	87.25	0	0	100	0	0	88.14	0	86.25	99.99	0	0	86.47	0	0	0	92.28	0	0	0	0	88.9	88.17	0	0	0	0	0	0	0	89.91
GCA_002347425.1	46-80	0	0	0	0	85.95	84.64	0	100	0	0	99.8	0	0	86.22	85.54	0	99.69	87.08	99.74	0	86.9	0	87.46	86.89	0	0	0	0	0	0	0	0	86.26	0
GCA_002382125.1	UBA4053	0	0	0	0	0	0	0	0	100	0	0	0	0	0	0	0	0	0	0	0	0	99.57	0	0	0	0	0	0	0	0	0	0	0	0
GCA_002382685.1	SCADC1-2-3	99.3	99.02	98.46	98.26	0	0	88.14	0	0	100	0	91.7	88.18	0	0	99.43	0	0	0	89.01	0	0	0	0	99.8	99.71	0	0	0	0	0	0	0	89.11
GCA_002382755.1	46-80	0	0	0	0	86.11	85.86	0	99.8	0	0	100	0	0	85.99	85.58	0	99.57	87.13	99.72	0	86.74	0	87.46	86.8	0	0	0	0	0	0	0	0	86.27	0
GCA_002402825.1	SCADC1-2-3	90.78	90.83	91.1	90.71	0	0	86.25	0	0	91.7	0	100	86.08	0	0	90.84	0	0	0	88.64	0	0	0	0	92.1	91.4	0	0	0	0	0	0	0	86.8
GCA_002403265.1	SCADC1-2-3	86.29	86.61	86.88	87.21	0	0	99.99	0	0	88.18	0	86.08	100	0	0	86.3	0	0	0	92.56	0	0	0	0	88.75	88.19	0	0	0	0	0	0	0	89.95
GCA_002418775.1	46-80	0	0	0	0	90.53	89.93	0	86.22	0	0	85.99	0	0	100	99.93	0	85.5	90.51	85.42	0	90.1	0	86.1	90.45	0	0	0	0	0	0	0	0	86.44	0
GCA_002421505.1	46-80	0	0	0	0	90.42	89.6	0	85.54	0	0	85.58	0	0	99.93	100	0	85.12	90.43	85.02	0	90.62	0	86.31	90.5	0	0	0	0	0	0	0	0	86.65	0
GCA_002423065.1	SCADC1-2-3	99.01	99.16	98.75	98.9	0	0	86.47	0	0	99.43	0	90.84	86.3	0	0	100	0	0	0	89.65	0	0	0	0	99.17	98.81	0	0	0	0	0	0	0	88.37
GCA_002441385.1	46-80	0	0	0	0	86.04	85.49	0	99.69	0	0	99.57	0	0	85.5	85.12	0	100	86.39	99.85	0	86.85	0	87.13	86.87	0	0	0	0	0	0	0	0	86.52	0
GCA_002452655.1	46-80	0	0	0	0	98.96	97	0	87.08	0	0	87.13	0	0	90.51	90.43	0	86.39	100	86.12	0	99.02	0	86.56	99.06	0	0	0	0	0	0	0	0	87	0
GCA_002469335.1	46-80	0	0	0	0	86.29	85.7	0	99.74	0	0	99.72	0	0	85.42	85.02	0	99.85	86.12	100	0	87.12	0	87.49	87.28	0	0	0	0	0	0	0	0	86.22	0
GCA_003445555.1	SCADC1-2-3	89.54	89.28	86.9	89.73	0	0	92.28	0	0	89.01	0	88.64	92.56	0	0	89.65	0	0	0	100	0	0	0	0	88.52	88.8	0	0	0	0	0	0	0	93.25
GCA_003445665.1	46-80	0	0	0	0	99.38	97.27	0	86.9	0	0	86.74	0	0	90.1	90.62	0	86.85	99.02	87.12	0	100	0	86.71	99.92	0	0	0	0	0	0	0	0	86.76	0
GCA_003457075.1	UBA4053	0	0	0	0	0	0	0	0	99.57	0	0	0	0	0	0	0	0	0	0	0	0	100	0	0	0	0	0	0	0	0	0	0	0	0
GCA_003485325.1	46-80	0	0	0	0	87.03	90.8	0	87.46	0	0	87.46	0	0	86.1	86.31	0	87.13	86.56	87.49	0	86.71	0	100	86.72	0	0	0	0	0	0	0	0	87.82	0
GCA_003513005.1	46-80	0	0	0	0	99.62	97.1	0	86.89	0	0	86.8	0	0	90.45	90.5	0	86.87	99.06	87.28	0	99.92	0	86.72	100	0	0	0	0	0	0	0	0	87.1	0
GCA_003529665.1	SCADC1-2-3	99.18	99.24	97.92	99.06	0	0	88.9	0	0	99.8	0	92.1	88.75	0	0	99.17	0	0	0	88.52	0	0	0	0	100	99.35	0	0	0	0	0	0	0	89.42
GCA_003535365.1	SCADC1-2-3	98.75	98.58	98.09	98.51	0	0	88.17	0	0	99.71	0	91.4	88.19	0	0	98.81	0	0	0	88.8	0	0	0	0	99.35	100	0	0	0	0	0	0	0	88.9
GCA_020725585.1	JAIMBK01	0	0	0	0	0	0	0	0	0	0	0	0	0	0	0	0	0	0	0	0	0	0	0	0	0	0	100	0	0	0	0	0	0	0
GCA_023511535.1	JAIMBK01	0	0	0	0	0	0	0	0	0	0	0	0	0	0	0	0	0	0	0	0	0	0	0	0	0	0	0	100	93.37	94.97	0	0	0	0
GCA_036822475.1	JAIMBK01	0	0	0	0	0	0	0	0	0	0	0	0	0	0	0	0	0	0	0	0	0	0	0	0	0	0	0	93.37	100	93.9	0	0	0	0
GCA_040753275.1	JAIMBK01	0	0	0	0	0	0	0	0	0	0	0	0	0	0	0	0	0	0	0	0	0	0	0	0	0	0	0	94.97	93.9	100	0	0	0	0
GCA_040755215.1	JAIMBK01	0	0	0	0	0	0	0	0	0	0	0	0	0	0	0	0	0	0	0	0	0	0	0	0	0	0	0	0	0	0	100	94.51	0	0
GCA_040755975.1	JAIMBK01	0	0	0	0	0	0	0	0	0	0	0	0	0	0	0	0	0	0	0	0	0	0	0	0	0	0	0	0	0	0	94.51	100	0	0
GCA_041653135.1	46-80	0	0	0	0	86.49	86.89	0	86.26	0	0	86.27	0	0	86.44	86.65	0	86.52	87	86.22	0	86.76	0	87.82	87.1	0	0	0	0	0	0	0	0	100	0
GCA_054600955.1	SCADC1-2-3	88.98	88.77	89.48	89.25	0	0	89.91	0	0	89.11	0	86.8	89.95	0	0	88.37	0	0	0	93.25	0	0	0	0	89.42	88.9	0	0	0	0	0	0	0	100

## Sheet: S3b_ANI_Summary
Genus 1	Genus 2	Type	n pairs	Mean ANI	Min ANI	Max ANI
46-80	46-80	Intra-genus	78	89.72	84.64	99.93
JAIMBK01	JAIMBK01	Intra-genus	4	94.19	93.37	94.97
SCADC1-2-3	SCADC1-2-3	Intra-genus	78	92.67	86.08	99.99
UBA4053	UBA4053	Intra-genus	1	99.57	99.57	99.57

## Sheet: S4a_Indicator_KOs
KO	Function	Target genus	Target prevalence	Max other prevalence	SCADC1-2-3 prev.	46-80 prev.	JAIMBK01 prev.	UBA4053 prev.
K03821	poly(R)-hydroxyalkanoic acid synthase subunit PhaC	SCADC1-2-3	0.923	0.077	0.923	0.077	0	0
K07023	HD domain	SCADC1-2-3	0.923	0.167	0.923	0	0.167	0
K07166	Belongs to the UPF0237 family	SCADC1-2-3	0.923	0	0.923	0	0	0
K13953	Alcohol dehydrogenase GroES-like domain	SCADC1-2-3	0.923	0	0.923	0	0	0
K01092	Inositol monophosphatase	SCADC1-2-3	0.846	0.077	0.846	0.077	0	0
K03387	Pyridine nucleotide-disulphide oxidoreductase	SCADC1-2-3	0.846	0	0.846	0	0	0
K05364	Cell division protein FtsI penicillin-binding protein	SCADC1-2-3	0.846	0	0.846	0	0	0
K16164	COG0179 2-keto-4-pentenoate hydratase 2-oxohepta-3-ene-1,7-dioic acid hydratase (catechol pathway)	SCADC1-2-3	0.846	0	0.846	0	0	0
K00560	Catalyzes the reductive methylation of 2'-deoxyuridine- 5'-monophosphate (dUMP) to 2'-deoxythymidine-5'-monophosphate (dTMP) while utilizing 5,10-methylenetetrahydrofolate (mTHF) as the methyl donor and reductant in the reaction, yielding dihydrofolate (DHF) as a by-product. This enzymatic reaction provides an intracellular de novo source of dTMP, an essential precursor for DNA biosynthesis	46-80	0.923	0	0	0.923	0	0
K00929	Belongs to the acetokinase family	46-80	0.923	0	0	0.923	0	0
K01533	ATPase, P-type (transporting), HAD superfamily, subfamily IC	46-80	0.923	0.154	0.154	0.923	0	0
K03593	Binds and transfers iron-sulfur (Fe-S) clusters to target apoproteins. Can hydrolyze ATP	46-80	0.923	0.167	0	0.923	0.167	0
K09928	Uncharacterized protein conserved in bacteria (DUF2062)	46-80	0.923	0	0	0.923	0	0
K18348	Catalyzes the interconversion of L-alanine and D- alanine. May also act on other amino acids	46-80	0.923	0	0	0.923	0	0
K05587	Respiratory-chain NADH dehydrogenase domain 51 kDa subunit	46-80	0.846	0	0	0.846	0	0
K07007	HI0933 family	46-80	0.846	0	0	0.846	0	0
K07030	TIGRFAM DAK2 domain fusion protein YloV	46-80	0.846	0	0	0.846	0	0
K07071	PFAM NAD dependent epimerase dehydratase family	46-80	0.846	0	0	0.846	0	0
K00024	Catalyzes the reversible oxidation of malate to oxaloacetate	JAIMBK01	1	0	0	0	1	0
K00180	PFAM pyruvate ferredoxin flavodoxin oxidoreductase	JAIMBK01	1	0	0	0	1	0
K00330	NDH-1 shuttles electrons from NADH, via FMN and iron- sulfur (Fe-S) centers, to quinones in the respiratory chain. The immediate electron acceptor for the enzyme in this species is believed to be a menaquinone. Couples the redox reaction to proton translocation (for every two electrons transferred, four hydrogen ions are translocated across the cytoplasmic membrane), and thus conserves the redox …	JAIMBK01	1	0	0	0	1	0
K00332	NDH-1 shuttles electrons from NADH, via FMN and iron- sulfur (Fe-S) centers, to quinones in the respiratory chain. The immediate electron acceptor for the enzyme in this species is believed to be a menaquinone. Couples the redox reaction to proton translocation (for every two electrons transferred, four hydrogen ions are translocated across the cytoplasmic membrane), and thus conserves the redox …	JAIMBK01	1	0	0	0	1	0
K00394	reductase alpha subunit	JAIMBK01	1	0	0	0	1	0
K00395	reductase beta subunit	JAIMBK01	1	0	0	0	1	0
K00632	Belongs to the thiolase family	JAIMBK01	1	0	0	0	1	0
K00958	PUA-like domain	JAIMBK01	1	0	0	0	1	0
K01810	Belongs to the GPI family	JAIMBK01	1	0	0	0	1	0
K01912	COG1541 Coenzyme F390 synthetase	JAIMBK01	1	0.077	0.077	0.077	1	0
K01961	TIGRFAM acetyl-CoA carboxylase, biotin carboxylase	JAIMBK01	1	0	0	0	1	0
K02415	Controls the rotational direction of flagella during chemotaxis	JAIMBK01	1	0.077	0.077	0	1	0
K02481	response regulator receiver	JAIMBK01	1	0	0	0	1	0
K02907	Ribosomal protein L30p/L7e	JAIMBK01	1	0	0	0	1	0
K03324	PFAM Na Picotransporter	JAIMBK01	1	0	0	0	1	0
K03523	PFAM BioY	JAIMBK01	1	0	0	0	1	0
K05299	Molybdopterin oxidoreductase Fe4S4 region	JAIMBK01	1	0	0	0	1	0
K05895	PFAM Precorrin-6x reductase CbiJ CobK	JAIMBK01	1	0	0	0	1	0
K06413	PFAM AAA ATPase central domain protein	JAIMBK01	1	0.154	0	0.154	1	0
K06873	DRTGG domain protein	JAIMBK01	1	0	0	0	1	0
K06951	PFAM Metal-dependent phosphohydrolase, HD	JAIMBK01	1	0	0	0	1	0
K07080	TRAP transporter solute receptor, TAXI family	JAIMBK01	1	0	0	0	1	0
K07161	containing von Willebrand factor type A (VWA) domain	JAIMBK01	1	0	0	0	1	0
K07516	3-hydroxyacyl-CoA dehydrogenase, NAD binding domain	JAIMBK01	1	0	0	0	1	0
K07709	His Kinase A (phosphoacceptor) domain	JAIMBK01	1	0	0	0	1	0
K07710	His Kinase A (phosphoacceptor) domain	JAIMBK01	1	0.077	0	0.077	1	0
K07714	response regulator receiver	JAIMBK01	1	0	0	0	1	0
K10943	response regulator receiver	JAIMBK01	1	0	0	0	1	0
K11261	Prokaryotic dksA/traR C4-type zinc finger	JAIMBK01	1	0.154	0	0.154	1	0
K11473	4Fe-4S dicluster domain	JAIMBK01	1	0	0	0	1	0
K13770	Bacterial regulatory proteins, tetR family	JAIMBK01	1	0	0	0	1	0
K13810	Belongs to the GPI family	JAIMBK01	1	0	0	0	1	0
K00179	Catalyzes the ferredoxin-dependent oxidative decarboxylation of arylpyruvates	JAIMBK01	0.833	0	0	0	0.833	0
K00343	NDH-1 shuttles electrons from NADH, via FMN and iron- sulfur (Fe-S) centers, to quinones in the respiratory chain. The immediate electron acceptor for the enzyme in this species is believed to be a menaquinone. Couples the redox reaction to proton translocation (for every two electrons transferred, four hydrogen ions are translocated across the cytoplasmic membrane), and thus conserves the redox …	JAIMBK01	0.833	0	0	0	0.833	0
K00390	Phosphoadenosine phosphosulfate reductase	JAIMBK01	0.833	0.077	0.077	0.077	0.833	0
K00688	Protein of unknown function (DUF3417)	JAIMBK01	0.833	0	0	0	0.833	0
K01118	Catalyzes the reductive cleavage of azo bond in aromatic azo compounds to the corresponding amines. Requires NADH, but not NADPH, as an electron donor for its activity	JAIMBK01	0.833	0	0	0	0.833	0
K01644	Belongs to the HpcH HpaI aldolase family	JAIMBK01	0.833	0	0	0	0.833	0
K01681	Aconitase family (aconitate hydratase)	JAIMBK01	0.833	0	0	0	0.833	0
K01965	Carbamoyl-phosphate synthetase large chain domain protein	JAIMBK01	0.833	0.077	0.077	0	0.833	0
K02398	bacterial-type flagellum organization	JAIMBK01	0.833	0.154	0	0.154	0.833	0
K02414	bacterial-type flagellum assembly	JAIMBK01	0.833	0	0	0	0.833	0
K02523	Belongs to the FPP GGPP synthase family	JAIMBK01	0.833	0	0	0	0.833	0
K03216	Belongs to the class IV-like SAM-binding methyltransferase superfamily. RNA methyltransferase TrmH family. TrmL subfamily	JAIMBK01	0.833	0	0	0	0.833	0
K03307	Belongs to the sodium solute symporter (SSF) (TC 2.A.21) family	JAIMBK01	0.833	0	0	0	0.833	0
K03721	PFAM Bacterial regulatory protein, Fis family	JAIMBK01	0.833	0	0	0	0.833	0
K03980	Involved in peptidoglycan biosynthesis. Transports lipid-linked peptidoglycan precursors from the inner to the outer leaflet of the cytoplasmic membrane	JAIMBK01	0.833	0.077	0	0.077	0.833	0
K04767	PFAM CBS domain	JAIMBK01	0.833	0	0	0	0.833	0
K05739	YIEGIA protein	JAIMBK01	0.833	0	0	0	0.833	0
K05979	Belongs to the ComB family	JAIMBK01	0.833	0.077	0	0.077	0.833	0
K06298	Sporulation and spore germination	JAIMBK01	0.833	0.077	0	0.077	0.833	0
K06338	Glycosyl transferase 4-like domain	JAIMBK01	0.833	0	0	0	0.833	0
K06714	PFAM Bacterial regulatory protein, Fis family	JAIMBK01	0.833	0	0	0	0.833	0
K06934	Domain of unknown function (DUF296)	JAIMBK01	0.833	0	0	0	0.833	0
K06940	PFAM Uncharacterised protein family (UPF0153)	JAIMBK01	0.833	0	0	0	0.833	0
K07005	Pyridoxamine 5'-phosphate oxidase	JAIMBK01	0.833	0	0	0	0.833	0
K07057	Involved in the biosynthesis of branched-chain polyamines, which support the growth of thermophiles under high- temperature conditions. Catalyzes the sequential condensation of spermidine with the aminopropyl groups of decarboxylated S- adenosylmethionines to produce N(4)-bis(aminopropyl)spermidine via N(4)-aminopropylspermidine	JAIMBK01	0.833	0	0	0	0.833	0
K07113	COG3030 Protein affecting phage T7 exclusion by the F plasmid	JAIMBK01	0.833	0	0	0	0.833	0
K07182	Putative nucleotidyltransferase substrate binding domain	JAIMBK01	0.833	0	0	0	0.833	0
K07576	exonuclease of the beta-lactamase fold involved in RNA	JAIMBK01	0.833	0	0	0	0.833	0
K07700	Signal transduction histidine kinase regulating citrate malate	JAIMBK01	0.833	0	0	0	0.833	0
K09766	Uncharacterized protein conserved in bacteria (DUF2225)	JAIMBK01	0.833	0	0	0	0.833	0
K09787	Might take part in the signal recognition particle (SRP) pathway. This is inferred from the conservation of its genetic proximity to ftsY ffh. May be a regulatory protein	JAIMBK01	0.833	0	0	0	0.833	0
K11180	Nitrite and sulphite reductase 4Fe-4S domain	JAIMBK01	0.833	0	0	0	0.833	0
K11181	Nitrite and sulphite reductase 4Fe-4S domain	JAIMBK01	0.833	0	0	0	0.833	0
K11691	Signal transduction histidine kinase regulating citrate malate	JAIMBK01	0.833	0	0	0	0.833	0
K11928	Sodium:solute symporter family	JAIMBK01	0.833	0	0	0	0.833	0
K12995	Glycosyl transferase 4-like domain	JAIMBK01	0.833	0	0	0	0.833	0
K14392	symporter activity	JAIMBK01	0.833	0	0	0	0.833	0
K15358	amidohydrolase family	JAIMBK01	0.833	0	0	0	0.833	0
K16783	PFAM Cobalt transport protein	JAIMBK01	0.833	0	0	0	0.833	0
K17363	PFAM fumarate reductase succinate dehydrogenase flavoprotein	JAIMBK01	0.833	0	0	0	0.833	0
K18814	PFAM O-Antigen	JAIMBK01	0.833	0	0	0	0.833	0
K20447	Aldehyde oxidase and xanthine dehydrogenase, a/b hammerhead domain	JAIMBK01	0.833	0	0	0	0.833	0
K20448	Aerobic-type carbon monoxide dehydrogenase, large subunit CoxL CutL-like protein	JAIMBK01	0.833	0	0	0	0.833	0
K20449	4Fe-4S binding domain	JAIMBK01	0.833	0	0	0	0.833	0
K21555	helix_turn_helix, cAMP Regulatory protein	JAIMBK01	0.833	0	0	0	0.833	0
K22338	NADH ubiquinone oxidoreductase	JAIMBK01	0.833	0	0	0	0.833	0
K00205	4 iron, 4 sulfur cluster binding	UBA4053	1	0	0	0	0	1
K00991	Catalyzes the formation of 4-diphosphocytidyl-2-C- methyl-D-erythritol from CTP and 2-C-methyl-D-erythritol 4- phosphate (MEP)	UBA4053	1	0.154	0	0.154	0	1
K02573	4 iron, 4 sulfur cluster binding	UBA4053	1	0	0	0	0	1
K04115	BadF/BadG/BcrA/BcrD ATPase family	UBA4053	1	0	0	0	0	1
K08679	Polysaccharide biosynthesis protein	UBA4053	1	0.154	0	0.154	0	1
K09680	Protein of unknown function DUF89	UBA4053	1	0	0	0	0	1

## Sheet: S4b_Unique_KOs
KO	Function	Target genus	Target prevalence	Max other prevalence	SCADC1-2-3 prev.	46-80 prev.	JAIMBK01 prev.	UBA4053 prev.
K03821	poly(R)-hydroxyalkanoic acid synthase subunit PhaC	SCADC1-2-3	0.923	0.077	0.923	0.077	0	0
K07023	HD domain	SCADC1-2-3	0.923	0.167	0.923	0	0.167	0
K07166	Belongs to the UPF0237 family	SCADC1-2-3	0.923	0	0.923	0	0	0
K13953	Alcohol dehydrogenase GroES-like domain	SCADC1-2-3	0.923	0	0.923	0	0	0
K19091	CRISPR-associated endoribonuclease Cas6	SCADC1-2-3	0.923	0.385	0.923	0.385	0.167	0
K00219	NADH flavin oxidoreductase NADH oxidase family	SCADC1-2-3	0.846	0.333	0.846	0	0.333	0
K01092	Inositol monophosphatase	SCADC1-2-3	0.846	0.077	0.846	0.077	0	0
K03387	Pyridine nucleotide-disulphide oxidoreductase	SCADC1-2-3	0.846	0	0.846	0	0	0
K05364	Cell division protein FtsI penicillin-binding protein	SCADC1-2-3	0.846	0	0.846	0	0	0
K16164	COG0179 2-keto-4-pentenoate hydratase 2-oxohepta-3-ene-1,7-dioic acid hydratase (catechol pathway)	SCADC1-2-3	0.846	0	0.846	0	0	0
K00027	Malic enzyme, NAD binding domain	SCADC1-2-3	0.769	0.333	0.769	0	0.333	0
K02071	ATPase activity	SCADC1-2-3	0.769	0	0.769	0	0	0
K02474	Belongs to the UDP-glucose GDP-mannose dehydrogenase family	SCADC1-2-3	0.769	0.462	0.769	0.462	0.167	0
K09157	UPF0210 protein	SCADC1-2-3	0.769	0	0.769	0	0	0
K11963	ABC transporter related	SCADC1-2-3	0.769	0	0.769	0	0	0
K18118	succinate CoA transferase	SCADC1-2-3	0.769	0.167	0.769	0	0.167	0
K18285	Radical SAM enzyme that catalyzes the addition of the adenosyl radical to the double bond of 3- (1- carboxyvinyl)oxy benzoate, leading to aminodeoxyfutalosine (AFL), a key intermediate in the formation of menaquinone (MK, vitamin K2) from chorismate	SCADC1-2-3	0.769	0.167	0.769	0	0.167	0
K01596	phosphoenolpyruvate carboxykinase (GTP) activity	SCADC1-2-3	0.692	0	0.692	0	0	0
K01711	Catalyzes the conversion of GDP-D-mannose to GDP-4- dehydro-6-deoxy-D-mannose	SCADC1-2-3	0.692	0.333	0.692	0.154	0.333	0
K01760	PFAM Cys Met metabolism, pyridoxal phosphate-dependent enzyme	SCADC1-2-3	0.692	0.462	0.692	0.462	0.167	0
K02586	PFAM oxidoreductase nitrogenase, component 1	SCADC1-2-3	0.692	0.385	0.692	0.385	0.167	0
K06167	Metallo-beta-lactamase superfamily	SCADC1-2-3	0.692	0	0.692	0	0	0
K07493	MULE transposase domain	SCADC1-2-3	0.692	0.167	0.692	0.077	0.167	0
K07544	CoA-transferase family III	SCADC1-2-3	0.692	0	0.692	0	0	0
K07669	PFAM response regulator receiver	SCADC1-2-3	0.692	0	0.692	0	0	0
K11779	Radical SAM enzyme that catalyzes the cyclization of dehypoxanthine futalosine (DHFL) into cyclic dehypoxanthine futalosine (CDHFL), a step in the biosynthesis of menaquinone (MK, vitamin K2)	SCADC1-2-3	0.692	0.333	0.692	0	0.333	0
K11782	Catalyzes the dehydration of chorismate into 3- (1- carboxyvinyl)oxy benzoate, a step in the biosynthesis of menaquinone (MK, vitamin K2)	SCADC1-2-3	0.692	0.167	0.692	0	0.167	0
K11784	Radical SAM enzyme that catalyzes the cyclization of dehypoxanthine futalosine (DHFL) into cyclic dehypoxanthine futalosine (CDHFL), a step in the biosynthesis of menaquinone (MK, vitamin K2)	SCADC1-2-3	0.692	0.333	0.692	0	0.333	0
K16052	Mechanosensitive ion channel	SCADC1-2-3	0.692	0.167	0.692	0	0.167	0
K17992	Ferredoxin	SCADC1-2-3	0.692	0	0.692	0	0	0
K00008	PFAM Alcohol dehydrogenase GroES domain protein	SCADC1-2-3	0.615	0.167	0.615	0	0.167	0
K05524	4 iron, 4 sulfur cluster binding	SCADC1-2-3	0.615	0	0.615	0	0	0
K05787	regulation of translation	SCADC1-2-3	0.615	0.077	0.615	0.077	0	0
K06894	Alpha-2-Macroglobulin	SCADC1-2-3	0.615	0	0.615	0	0	0
K07033	PFAM SufBD protein	SCADC1-2-3	0.615	0.231	0.615	0.231	0	0
K07066	Domain of unknown function (DUF3368)	SCADC1-2-3	0.615	0.077	0.615	0.077	0	0
K11717	Aminotransferase class-V	SCADC1-2-3	0.615	0	0.615	0	0	0
K13274	Belongs to the peptidase S8 family	SCADC1-2-3	0.615	0.462	0.615	0.462	0.167	0
K14645	Belongs to the peptidase S8 family	SCADC1-2-3	0.615	0.231	0.615	0.231	0.167	0
K15790	iron-sulfur transferase activity	SCADC1-2-3	0.615	0.077	0.615	0.077	0	0
K19116	TIGRFAM CRISPR-associated protein Cas5	SCADC1-2-3	0.615	0.077	0.615	0.077	0	0
K19142	TIGRFAM CRISPR-associated RAMP protein, Cmr6 family	SCADC1-2-3	0.615	0.333	0.615	0.308	0.333	0
K19157	Bacterial toxin of type II toxin-antitoxin system, YafQ	SCADC1-2-3	0.615	0.385	0.615	0.385	0	0
K20037	Catalyzes activation of the choline trimethylamine-lyase CutC under anaerobic conditions by generation of an organic free radical on a glycine residue, via	SCADC1-2-3	0.615	0.167	0.615	0.077	0.167	0
K21395	Bacterial extracellular solute-binding protein, family 7	SCADC1-2-3	0.615	0.167	0.615	0	0.167	0
K03563	Could accelerate the degradation of some genes transcripts potentially through selective RNA binding	SCADC1-2-3	0.538	0.167	0.538	0	0.167	0
K03809	FMN binding	SCADC1-2-3	0.538	0	0.538	0	0	0
K07257	Cytidylyltransferase	SCADC1-2-3	0.538	0.167	0.538	0.077	0.167	0
K09015	PFAM SufBD protein	SCADC1-2-3	0.538	0	0.538	0	0	0
K09122	Mut7-C RNAse domain	SCADC1-2-3	0.538	0.333	0.538	0.077	0.333	0
K13626	Binds to the C-terminal region of flagellin, which is implicated in polymerization, and participates in the assembly of the flagellum	SCADC1-2-3	0.538	0	0.538	0	0	0
K19072	Oxidoreductase	SCADC1-2-3	0.538	0	0.538	0	0	0
K22227	SMART Elongator protein 3 MiaB NifB	SCADC1-2-3	0.538	0.333	0.538	0	0.333	0
K00560	Catalyzes the reductive methylation of 2'-deoxyuridine- 5'-monophosphate (dUMP) to 2'-deoxythymidine-5'-monophosphate (dTMP) while utilizing 5,10-methylenetetrahydrofolate (mTHF) as the methyl donor and reductant in the reaction, yielding dihydrofolate (DHF) as a by-product. This enzymatic reaction provides an intracellular de novo source of dTMP, an essential precursor for DNA biosynthesis	46-80	0.923	0	0	0.923	0	0
K00634	PFAM Phosphate acetyl butaryl transferase	46-80	0.923	0.333	0	0.923	0.333	0
K00929	Belongs to the acetokinase family	46-80	0.923	0	0	0.923	0	0
K01533	ATPase, P-type (transporting), HAD superfamily, subfamily IC	46-80	0.923	0.154	0.154	0.923	0	0
K01835	phosphoglucomutase phosphomannomutase alpha beta alpha domain II	46-80	0.923	0.333	0	0.923	0.333	0
K03593	Binds and transfers iron-sulfur (Fe-S) clusters to target apoproteins. Can hydrolyze ATP	46-80	0.923	0.167	0	0.923	0.167	0
K09928	Uncharacterized protein conserved in bacteria (DUF2062)	46-80	0.923	0	0	0.923	0	0
K15555	Abc transporter	46-80	0.923	0.308	0.308	0.923	0	0
K18331	Respiratory-chain NADH dehydrogenase domain 51 kDa subunit	46-80	0.923	0.385	0.385	0.923	0.333	0
K18348	Catalyzes the interconversion of L-alanine and D- alanine. May also act on other amino acids	46-80	0.923	0	0	0.923	0	0
K03546	ATPase involved in DNA repair	46-80	0.846	0.462	0.462	0.846	0.333	0
K03768	PPIases accelerate the folding of proteins. It catalyzes the cis-trans isomerization of proline imidic peptide bonds in oligopeptides	46-80	0.846	0.308	0.308	0.846	0	0
K05587	Respiratory-chain NADH dehydrogenase domain 51 kDa subunit	46-80	0.846	0	0	0.846	0	0
K07007	HI0933 family	46-80	0.846	0	0	0.846	0	0
K07030	TIGRFAM DAK2 domain fusion protein YloV	46-80	0.846	0	0	0.846	0	0
K07071	PFAM NAD dependent epimerase dehydratase family	46-80	0.846	0	0	0.846	0	0
K09807	Protein of unknown function (DUF541)	46-80	0.846	0.333	0.077	0.846	0.333	0
K01843	Radical SAM	46-80	0.769	0.167	0.077	0.769	0.167	0
K03943	Thioredoxin-like [2Fe-2S] ferredoxin	46-80	0.769	0.167	0	0.769	0.167	0
K07646	Osmosensitive K channel His kinase sensor domain	46-80	0.769	0.462	0.462	0.769	0.167	0
K07667	Transcriptional regulatory protein, C terminal	46-80	0.769	0.333	0.231	0.769	0.333	0
K21935	PFAM GCN5-related N-acetyltransferase	46-80	0.769	0.077	0.077	0.769	0	0
K00641	alpha/beta hydrolase fold	46-80	0.692	0	0	0.692	0	0
K03813	Belongs to the NadC ModD family	46-80	0.692	0.077	0.077	0.692	0	0
K06147	ABC transporter	46-80	0.692	0.385	0.385	0.692	0	0
K16874	3-octaprenyl-4-hydroxybenzoate carboxy-lyase	46-80	0.692	0.333	0	0.692	0.333	0
K17462	COG0500 SAM-dependent methyltransferases	46-80	0.692	0.077	0.077	0.692	0	0
K18006	Iron hydrogenase small subunit	46-80	0.692	0.308	0.308	0.692	0	0
K19814	TIGRFAM lysine 2,3-aminomutase YodO family protein	46-80	0.692	0.167	0.154	0.692	0.167	0
K00549	Catalyzes the transfer of a methyl group from 5- methyltetrahydrofolate to homocysteine resulting in methionine formation	46-80	0.615	0	0	0.615	0	0
K01740	Cys/Met metabolism PLP-dependent enzyme	46-80	0.615	0	0	0.615	0	0
K03227	Role in flagellar biosynthesis	46-80	0.615	0	0	0.615	0	0
K05592	Belongs to the DEAD box helicase family	46-80	0.615	0.231	0.231	0.615	0	0
K06148	ABC-type multidrug transport system ATPase and permease	46-80	0.615	0.167	0	0.615	0.167	0
K06177	Responsible for synthesis of pseudouridine from uracil	46-80	0.615	0	0	0.615	0	0
K06196	cytochrome c biogenesis protein, transmembrane region	46-80	0.615	0.077	0.077	0.615	0	0
K08068	PFAM UDP-N-acetylglucosamine 2-epimerase	46-80	0.615	0.308	0.308	0.615	0	0
K13006	Bacterial transferase hexapeptide (six repeats)	46-80	0.615	0	0	0.615	0	0
K13012	sugar transferase	46-80	0.615	0	0	0.615	0	0
K14475	Chagasin family peptidase inhibitor I42	46-80	0.615	0	0	0.615	0	0
K15669	PFAM Nucleotidyl transferase	46-80	0.615	0.308	0.308	0.615	0	0
K18429	PFAM UDP-N-acetylglucosamine 2-epimerase	46-80	0.615	0.308	0.308	0.615	0	0
K18430	PFAM N-acetylneuraminic acid synthase	46-80	0.615	0.385	0.385	0.615	0.167	0
K18431	PFAM acylneuraminate cytidylyltransferase	46-80	0.615	0.231	0.231	0.615	0	0
K18843	Toxin-antitoxin system, antitoxin component, HicB family	46-80	0.615	0.333	0.077	0.615	0.333	0
K18914	acid phosphatase activity	46-80	0.615	0	0	0.615	0	0
K21814	acid phosphatase activity	46-80	0.615	0	0	0.615	0	0
K22390	acid phosphatase activity	46-80	0.615	0	0	0.615	0	0
K00852	COG COG0524 Sugar kinases, ribokinase family	46-80	0.538	0.167	0	0.538	0.167	0
K00878	Catalyzes the phosphorylation of the hydroxyl group of 4-methyl-5-beta-hydroxyethylthiazole (THZ)	46-80	0.538	0	0	0.538	0	0
K00996	Exopolysaccharide biosynthesis polyprenyl glycosylphosphotransferase	46-80	0.538	0	0	0.538	0	0
K02056	COG COG1129 ABC-type sugar transport system, ATPase component	46-80	0.538	0	0	0.538	0	0
K02472	PFAM UDP-glucose GDP-mannose dehydrogenase	46-80	0.538	0	0	0.538	0	0
K02587	Belongs to the NifD NifK NifE NifN family	46-80	0.538	0.462	0.462	0.538	0.167	0
K07098	Calcineurin-like phosphoesterase superfamily domain	46-80	0.538	0.167	0	0.538	0.167	0
K08978	EamA-like transporter family	46-80	0.538	0	0	0.538	0	0
K10439	ABC-type sugar transport system periplasmic component	46-80	0.538	0	0	0.538	0	0
K10440	Belongs to the binding-protein-dependent transport system permease family	46-80	0.538	0	0	0.538	0	0
K10549	ABC-type sugar transport system periplasmic component	46-80	0.538	0	0	0.538	0	0
K12267	Has an important function as a repair enzyme for proteins that have been inactivated by oxidation. Catalyzes the reversible oxidation-reduction of methionine sulfoxide in proteins to methionine	46-80	0.538	0	0	0.538	0	0
K13730	leucine-rich repeat-containing protein typical subtype	46-80	0.538	0	0	0.538	0	0
K13795	4 iron, 4 sulfur cluster binding	46-80	0.538	0.333	0	0.538	0.333	0
K15511	4 iron, 4 sulfur cluster binding	46-80	0.538	0.333	0	0.538	0.333	0
K15977	-	46-80	0.538	0.167	0	0.538	0.167	0
K17947	ADP-glyceromanno-heptose 6-epimerase activity	46-80	0.538	0	0	0.538	0	0
K20451	PrpF protein	46-80	0.538	0	0	0.538	0	0
K00024	Catalyzes the reversible oxidation of malate to oxaloacetate	JAIMBK01	1	0	0	0	1	0
K00104	FAD linked oxidases, C-terminal domain	JAIMBK01	1	0.231	0	0.231	1	0
K00180	PFAM pyruvate ferredoxin flavodoxin oxidoreductase	JAIMBK01	1	0	0	0	1	0
K00330	NDH-1 shuttles electrons from NADH, via FMN and iron- sulfur (Fe-S) centers, to quinones in the respiratory chain. The immediate electron acceptor for the enzyme in this species is believed to be a menaquinone. Couples the redox reaction to proton translocation (for every two electrons transferred, four hydrogen ions are translocated across the cytoplasmic membrane), and thus conserves the redox …	JAIMBK01	1	0	0	0	1	0
K00332	NDH-1 shuttles electrons from NADH, via FMN and iron- sulfur (Fe-S) centers, to quinones in the respiratory chain. The immediate electron acceptor for the enzyme in this species is believed to be a menaquinone. Couples the redox reaction to proton translocation (for every two electrons transferred, four hydrogen ions are translocated across the cytoplasmic membrane), and thus conserves the redox …	JAIMBK01	1	0	0	0	1	0
K00394	reductase alpha subunit	JAIMBK01	1	0	0	0	1	0
K00395	reductase beta subunit	JAIMBK01	1	0	0	0	1	0
K00632	Belongs to the thiolase family	JAIMBK01	1	0	0	0	1	0
K00876	Phosphoribulokinase / Uridine kinase family	JAIMBK01	1	0.385	0	0.385	1	0
K00958	PUA-like domain	JAIMBK01	1	0	0	0	1	0
K01810	Belongs to the GPI family	JAIMBK01	1	0	0	0	1	0
K01912	COG1541 Coenzyme F390 synthetase	JAIMBK01	1	0.077	0.077	0.077	1	0
K01961	TIGRFAM acetyl-CoA carboxylase, biotin carboxylase	JAIMBK01	1	0	0	0	1	0
K02415	Controls the rotational direction of flagella during chemotaxis	JAIMBK01	1	0.077	0.077	0	1	0
K02418	PFAM Flagellar biosynthesis protein, FliO	JAIMBK01	1	0.462	0	0.462	1	0
K02481	response regulator receiver	JAIMBK01	1	0	0	0	1	0
K02907	Ribosomal protein L30p/L7e	JAIMBK01	1	0	0	0	1	0
K03324	PFAM Na Picotransporter	JAIMBK01	1	0	0	0	1	0
K03523	PFAM BioY	JAIMBK01	1	0	0	0	1	0
K05299	Molybdopterin oxidoreductase Fe4S4 region	JAIMBK01	1	0	0	0	1	0
K05521	PFAM ADP-ribosylation Crystallin J1	JAIMBK01	1	0.385	0.154	0.385	1	0
K05895	PFAM Precorrin-6x reductase CbiJ CobK	JAIMBK01	1	0	0	0	1	0
K06413	PFAM AAA ATPase central domain protein	JAIMBK01	1	0.154	0	0.154	1	0
K06873	DRTGG domain protein	JAIMBK01	1	0	0	0	1	0
K06929	CoA binding domain	JAIMBK01	1	0.231	0.231	0	1	0
K06951	PFAM Metal-dependent phosphohydrolase, HD	JAIMBK01	1	0	0	0	1	0
K07080	TRAP transporter solute receptor, TAXI family	JAIMBK01	1	0	0	0	1	0
K07161	containing von Willebrand factor type A (VWA) domain	JAIMBK01	1	0	0	0	1	0
K07516	3-hydroxyacyl-CoA dehydrogenase, NAD binding domain	JAIMBK01	1	0	0	0	1	0
K07709	His Kinase A (phosphoacceptor) domain	JAIMBK01	1	0	0	0	1	0
K07710	His Kinase A (phosphoacceptor) domain	JAIMBK01	1	0.077	0	0.077	1	0
K07714	response regulator receiver	JAIMBK01	1	0	0	0	1	0
K08097	PFAM (2R)-phospho-3-sulfolactate synthase ComA	JAIMBK01	1	0.308	0	0.308	1	0
K08221	PFAM Major Facilitator Superfamily	JAIMBK01	1	0.385	0	0.385	1	0
K10747	PFAM ATP dependent DNA ligase	JAIMBK01	1	0.462	0	0.462	1	0
K10943	response regulator receiver	JAIMBK01	1	0	0	0	1	0
K11261	Prokaryotic dksA/traR C4-type zinc finger	JAIMBK01	1	0.154	0	0.154	1	0
K11473	4Fe-4S dicluster domain	JAIMBK01	1	0	0	0	1	0
K13770	Bacterial regulatory proteins, tetR family	JAIMBK01	1	0	0	0	1	0
K13810	Belongs to the GPI family	JAIMBK01	1	0	0	0	1	0
K18244	Acyl-CoA dehydrogenase, C-terminal domain	JAIMBK01	1	0.462	0.462	0.154	1	0
K19578	PFAM Major Facilitator Superfamily	JAIMBK01	1	0.385	0	0.385	1	0
K00179	Catalyzes the ferredoxin-dependent oxidative decarboxylation of arylpyruvates	JAIMBK01	0.833	0	0	0	0.833	0
K00261	Belongs to the Glu Leu Phe Val dehydrogenases family	JAIMBK01	0.833	0.385	0.231	0.385	0.833	0
K00333	NADH-ubiquinone oxidoreductase chain 49kDa	JAIMBK01	0.833	0.308	0.308	0	0.833	0
K00338	PFAM 4Fe-4S ferredoxin, iron-sulfur binding domain protein	JAIMBK01	0.833	0.308	0.308	0	0.833	0
K00343	NDH-1 shuttles electrons from NADH, via FMN and iron- sulfur (Fe-S) centers, to quinones in the respiratory chain. The immediate electron acceptor for the enzyme in this species is believed to be a menaquinone. Couples the redox reaction to proton translocation (for every two electrons transferred, four hydrogen ions are translocated across the cytoplasmic membrane), and thus conserves the redox …	JAIMBK01	0.833	0	0	0	0.833	0
K00390	Phosphoadenosine phosphosulfate reductase	JAIMBK01	0.833	0.077	0.077	0.077	0.833	0
K00688	Protein of unknown function (DUF3417)	JAIMBK01	0.833	0	0	0	0.833	0
K00995	Belongs to the CDP-alcohol phosphatidyltransferase class-I family	JAIMBK01	0.833	0.308	0	0.308	0.833	0
K01118	Catalyzes the reductive cleavage of azo bond in aromatic azo compounds to the corresponding amines. Requires NADH, but not NADPH, as an electron donor for its activity	JAIMBK01	0.833	0	0	0	0.833	0
K01644	Belongs to the HpcH HpaI aldolase family	JAIMBK01	0.833	0	0	0	0.833	0
K01681	Aconitase family (aconitate hydratase)	JAIMBK01	0.833	0	0	0	0.833	0
K01907	TIGRFAM Acetoacetyl-CoA synthase	JAIMBK01	0.833	0.231	0.231	0.077	0.833	0
K01916	Catalyzes the ATP-dependent amidation of deamido-NAD to form NAD. Uses ammonia as a nitrogen source	JAIMBK01	0.833	0.385	0.077	0.385	0.833	0
K01962	malonyl-CoA biosynthetic process	JAIMBK01	0.833	0.385	0	0.385	0.833	0
K01963	malonyl-CoA biosynthetic process	JAIMBK01	0.833	0.385	0	0.385	0.833	0
K01965	Carbamoyl-phosphate synthetase large chain domain protein	JAIMBK01	0.833	0.077	0.077	0	0.833	0
K02398	bacterial-type flagellum organization	JAIMBK01	0.833	0.154	0	0.154	0.833	0
K02414	bacterial-type flagellum assembly	JAIMBK01	0.833	0	0	0	0.833	0
K02482	phosphorelay sensor kinase activity	JAIMBK01	0.833	0.231	0	0.231	0.833	0
K02523	Belongs to the FPP GGPP synthase family	JAIMBK01	0.833	0	0	0	0.833	0
K02550	PFAM L-lactate permease	JAIMBK01	0.833	0.385	0	0.385	0.833	0
K03216	Belongs to the class IV-like SAM-binding methyltransferase superfamily. RNA methyltransferase TrmH family. TrmL subfamily	JAIMBK01	0.833	0	0	0	0.833	0
K03303	PFAM L-lactate permease	JAIMBK01	0.833	0.385	0	0.385	0.833	0
K03307	Belongs to the sodium solute symporter (SSF) (TC 2.A.21) family	JAIMBK01	0.833	0	0	0	0.833	0
K03710	UTRA	JAIMBK01	0.833	0.231	0.231	0	0.833	0
K03721	PFAM Bacterial regulatory protein, Fis family	JAIMBK01	0.833	0	0	0	0.833	0
K03980	Involved in peptidoglycan biosynthesis. Transports lipid-linked peptidoglycan precursors from the inner to the outer leaflet of the cytoplasmic membrane	JAIMBK01	0.833	0.077	0	0.077	0.833	0
K04767	PFAM CBS domain	JAIMBK01	0.833	0	0	0	0.833	0
K05739	YIEGIA protein	JAIMBK01	0.833	0	0	0	0.833	0
K05979	Belongs to the ComB family	JAIMBK01	0.833	0.077	0	0.077	0.833	0
K06041	Domain in cystathionine beta-synthase and other proteins.	JAIMBK01	0.833	0.231	0.231	0	0.833	0
K06298	Sporulation and spore germination	JAIMBK01	0.833	0.077	0	0.077	0.833	0
K06338	Glycosyl transferase 4-like domain	JAIMBK01	0.833	0	0	0	0.833	0
K06714	PFAM Bacterial regulatory protein, Fis family	JAIMBK01	0.833	0	0	0	0.833	0
K06934	Domain of unknown function (DUF296)	JAIMBK01	0.833	0	0	0	0.833	0
K06940	PFAM Uncharacterised protein family (UPF0153)	JAIMBK01	0.833	0	0	0	0.833	0
K07005	Pyridoxamine 5'-phosphate oxidase	JAIMBK01	0.833	0	0	0	0.833	0
K07011	Glycosyl transferase family 21	JAIMBK01	0.833	0.231	0	0.231	0.833	0
K07057	Involved in the biosynthesis of branched-chain polyamines, which support the growth of thermophiles under high- temperature conditions. Catalyzes the sequential condensation of spermidine with the aminopropyl groups of decarboxylated S- adenosylmethionines to produce N(4)-bis(aminopropyl)spermidine via N(4)-aminopropylspermidine	JAIMBK01	0.833	0	0	0	0.833	0
K07113	COG3030 Protein affecting phage T7 exclusion by the F plasmid	JAIMBK01	0.833	0	0	0	0.833	0
K07182	Putative nucleotidyltransferase substrate binding domain	JAIMBK01	0.833	0	0	0	0.833	0
K07220	Phosphate transport regulator related to PhoU	JAIMBK01	0.833	0.308	0	0.308	0.833	0
K07228	PFAM TrkA-C domain	JAIMBK01	0.833	0.231	0.077	0.231	0.833	0
K07315	Sigma factor PP2C-like phosphatases	JAIMBK01	0.833	0.308	0	0.308	0.833	0
K07576	exonuclease of the beta-lactamase fold involved in RNA	JAIMBK01	0.833	0	0	0	0.833	0
K07700	Signal transduction histidine kinase regulating citrate malate	JAIMBK01	0.833	0	0	0	0.833	0
K09766	Uncharacterized protein conserved in bacteria (DUF2225)	JAIMBK01	0.833	0	0	0	0.833	0
K09787	Might take part in the signal recognition particle (SRP) pathway. This is inferred from the conservation of its genetic proximity to ftsY ffh. May be a regulatory protein	JAIMBK01	0.833	0	0	0	0.833	0
K09819	ABC 3 transport family	JAIMBK01	0.833	0.308	0.308	0	0.833	0
K11180	Nitrite and sulphite reductase 4Fe-4S domain	JAIMBK01	0.833	0	0	0	0.833	0
K11181	Nitrite and sulphite reductase 4Fe-4S domain	JAIMBK01	0.833	0	0	0	0.833	0
K11527	transcription factor binding	JAIMBK01	0.833	0.231	0	0.231	0.833	0
K11690	transporter, DctM subunit	JAIMBK01	0.833	0.462	0	0.462	0.833	0
K11691	Signal transduction histidine kinase regulating citrate malate	JAIMBK01	0.833	0	0	0	0.833	0
K11928	Sodium:solute symporter family	JAIMBK01	0.833	0	0	0	0.833	0
K12995	Glycosyl transferase 4-like domain	JAIMBK01	0.833	0	0	0	0.833	0
K14392	symporter activity	JAIMBK01	0.833	0	0	0	0.833	0
K15358	amidohydrolase family	JAIMBK01	0.833	0	0	0	0.833	0
K16011	TIGRFAM mannose-1-phosphate guanylyltransferase mannose-6-phosphate isomerase	JAIMBK01	0.833	0.308	0.308	0	0.833	0
K16783	PFAM Cobalt transport protein	JAIMBK01	0.833	0	0	0	0.833	0
K17363	PFAM fumarate reductase succinate dehydrogenase flavoprotein	JAIMBK01	0.833	0	0	0	0.833	0
K18330	PFAM NADH dehydrogenase (ubiquinone) 24 kDa subunit	JAIMBK01	0.833	0.231	0.077	0.231	0.833	0
K18814	PFAM O-Antigen	JAIMBK01	0.833	0	0	0	0.833	0
K20447	Aldehyde oxidase and xanthine dehydrogenase, a/b hammerhead domain	JAIMBK01	0.833	0	0	0	0.833	0
K20448	Aerobic-type carbon monoxide dehydrogenase, large subunit CoxL CutL-like protein	JAIMBK01	0.833	0	0	0	0.833	0
K20449	4Fe-4S binding domain	JAIMBK01	0.833	0	0	0	0.833	0
K21555	helix_turn_helix, cAMP Regulatory protein	JAIMBK01	0.833	0	0	0	0.833	0
K22338	NADH ubiquinone oxidoreductase	JAIMBK01	0.833	0	0	0	0.833	0
K00036	Catalyzes the oxidation of glucose 6-phosphate to 6- phosphogluconolactone	JAIMBK01	0.667	0	0	0	0.667	0
K00329	epimerase	JAIMBK01	0.667	0	0	0	0.667	0
K00331	PFAM NADH ubiquinone oxidoreductase 20 kDa subunit	JAIMBK01	0.667	0.308	0.308	0	0.667	0
K00337	PFAM respiratory-chain NADH dehydrogenase, subunit 1	JAIMBK01	0.667	0.308	0.308	0	0.667	0
K00339	Belongs to the complex I subunit 6 family	JAIMBK01	0.667	0	0	0	0.667	0
K00340	NDH-1 shuttles electrons from NADH, via FMN and iron- sulfur (Fe-S) centers, to quinones in the respiratory chain. The immediate electron acceptor for the enzyme in this species is believed to be a menaquinone. Couples the redox reaction to proton translocation (for every two electrons transferred, four hydrogen ions are translocated across the cytoplasmic membrane), and thus conserves the redox …	JAIMBK01	0.667	0	0	0	0.667	0
K00341	NADH-Ubiquinone oxidoreductase (complex I), chain 5	JAIMBK01	0.667	0	0	0	0.667	0
K00342	TIGRFAM proton-translocating NADH-quinone oxidoreductase, chain M	JAIMBK01	0.667	0	0	0	0.667	0
K00356	epimerase	JAIMBK01	0.667	0	0	0	0.667	0
K00389	Domain of unknown function (DUF202)	JAIMBK01	0.667	0	0	0	0.667	0
K00433	PFAM alpha beta hydrolase fold	JAIMBK01	0.667	0.308	0	0.308	0.667	0
K00483	gamma-aminobutyrate metabolism dehydratase isomerase	JAIMBK01	0.667	0	0	0	0.667	0
K00557	Belongs to the class I-like SAM-binding methyltransferase superfamily. RNA M5U methyltransferase family	JAIMBK01	0.667	0	0	0	0.667	0
K00584	Tetrahydromethanopterin S-methyltransferase MtrH subunit	JAIMBK01	0.667	0	0	0	0.667	0
K00860	Catalyzes the synthesis of activated sulfate	JAIMBK01	0.667	0	0	0	0.667	0
K01464	COG0044 Dihydroorotase and related cyclic amidohydrolases	JAIMBK01	0.667	0	0	0	0.667	0
K01640	HMGL-like	JAIMBK01	0.667	0	0	0	0.667	0
K01896	PFAM AMP-dependent synthetase	JAIMBK01	0.667	0	0	0	0.667	0
K02028	COG1126 ABC-type polar amino acid transport system, ATPase component	JAIMBK01	0.667	0	0	0	0.667	0
K02031	Belongs to the ABC transporter superfamily	JAIMBK01	0.667	0.231	0	0.231	0.667	0
K02033	ABC-type dipeptide oligopeptide nickel transport systems, permease components	JAIMBK01	0.667	0.308	0	0.308	0.667	0
K02034	PFAM binding-protein-dependent transport systems inner membrane component	JAIMBK01	0.667	0.308	0	0.308	0.667	0
K02454	General secretory system II, protein E domain protein	JAIMBK01	0.667	0.154	0.077	0.154	0.667	0
K02479	Psort location Cytoplasmic, score	JAIMBK01	0.667	0	0	0	0.667	0
K02617	Bacterial transferase hexapeptide	JAIMBK01	0.667	0	0	0	0.667	0
K02688	PFAM Bacterial regulatory protein, Fis family	JAIMBK01	0.667	0	0	0	0.667	0
K03154	Mut7-C ubiquitin	JAIMBK01	0.667	0	0	0	0.667	0
K03271	SIS domain	JAIMBK01	0.667	0.231	0	0.231	0.667	0
K03272	ADP-L-glycero-beta-D-manno-heptose biosynthetic process	JAIMBK01	0.667	0	0	0	0.667	0
K03446	TIGRFAM drug resistance transporter, EmrB QacA subfamily	JAIMBK01	0.667	0.385	0.385	0.385	0.667	0
K03620	Cytochrome b/b6/petB	JAIMBK01	0.667	0	0	0	0.667	0
K03716	TIGRFAM spore photoproduct lyase	JAIMBK01	0.667	0.154	0.077	0.154	0.667	0
K03769	PFAM PpiC-type peptidyl-prolyl cis-trans isomerase	JAIMBK01	0.667	0	0	0	0.667	0
K03776	Chemotaxis sensory transducer	JAIMBK01	0.667	0.077	0.077	0	0.667	0
K04065	BON domain	JAIMBK01	0.667	0	0	0	0.667	0
K05575	TIGRFAM proton-translocating NADH-quinone oxidoreductase, chain M	JAIMBK01	0.667	0	0	0	0.667	0
K05576	NDH-1 shuttles electrons from NADH, via FMN and iron- sulfur (Fe-S) centers, to quinones in the respiratory chain. The immediate electron acceptor for the enzyme in this species is believed to be a menaquinone. Couples the redox reaction to proton translocation (for every two electrons transferred, four hydrogen ions are translocated across the cytoplasmic membrane), and thus conserves the redox …	JAIMBK01	0.667	0	0	0	0.667	0
K05578	Belongs to the complex I subunit 6 family	JAIMBK01	0.667	0	0	0	0.667	0
K05580	NDH-1 shuttles electrons from NADH, via FMN and iron- sulfur (Fe-S) centers, to quinones in the respiratory chain. The immediate electron acceptor for the enzyme in this species is believed to be ubiquinone. Couples the redox reaction to proton translocation (for every two electrons transferred, four hydrogen ions are translocated across the cytoplasmic membrane), and thus conserves the redox ene…	JAIMBK01	0.667	0	0	0	0.667	0
K05799	PFAM Bacterial regulatory proteins, gntR family	JAIMBK01	0.667	0	0	0	0.667	0
K06306	PFAM Glycosyl hydrolases family 18	JAIMBK01	0.667	0.077	0	0.077	0.667	0
K07064	Toxic component of a toxin-antitoxin (TA) module. An RNase	JAIMBK01	0.667	0	0	0	0.667	0
K07139	PFAM Radical SAM	JAIMBK01	0.667	0.231	0	0.231	0.667	0
K07141	MobA-Related Protein	JAIMBK01	0.667	0.385	0.077	0.385	0.667	0
K07250	Belongs to the class-III pyridoxal-phosphate-dependent aminotransferase family	JAIMBK01	0.667	0.077	0	0.077	0.667	0
K07533	PFAM PpiC-type peptidyl-prolyl cis-trans isomerase	JAIMBK01	0.667	0	0	0	0.667	0
K07692	Response regulator receiver	JAIMBK01	0.667	0.154	0.154	0	0.667	0
K07729	Helix-turn-helix XRE-family like proteins	JAIMBK01	0.667	0.385	0	0.385	0.667	0
K08084	Tfp pilus assembly protein FimT	JAIMBK01	0.667	0.077	0.077	0	0.667	0
K10896	ERCC4 domain	JAIMBK01	0.667	0	0	0	0.667	0
K13811	Catalyzes the synthesis of activated sulfate	JAIMBK01	0.667	0	0	0	0.667	0
K14393	Belongs to the sodium solute symporter (SSF) (TC 2.A.21) family	JAIMBK01	0.667	0	0	0	0.667	0
K14534	gamma-aminobutyrate metabolism dehydratase isomerase	JAIMBK01	0.667	0	0	0	0.667	0
K16651	GHMP kinase	JAIMBK01	0.667	0	0	0	0.667	0
K18702	CoA-transferase family III	JAIMBK01	0.667	0.077	0	0.077	0.667	0
K18967	Response regulator receiver	JAIMBK01	0.667	0	0	0	0.667	0
K19075	CRISPR-associated regulatory protein, DevR family	JAIMBK01	0.667	0.385	0.231	0.385	0.667	0
K19333	regulatory protein IclR	JAIMBK01	0.667	0	0	0	0.667	0
K19954	Iron-containing alcohol dehydrogenase	JAIMBK01	0.667	0	0	0	0.667	0
K20025	Benzoyl-CoA reductase 2-hydroxyglutaryl-CoA dehydratase subunit, BcrC BadD HgdB	JAIMBK01	0.667	0	0	0	0.667	0
K20026	Benzoyl-CoA reductase 2-hydroxyglutaryl-CoA dehydratase subunit, BcrC BadD HgdB	JAIMBK01	0.667	0	0	0	0.667	0
K20626	Benzoyl-CoA reductase 2-hydroxyglutaryl-CoA dehydratase subunit, BcrC BadD HgdB	JAIMBK01	0.667	0	0	0	0.667	0
K20627	Benzoyl-CoA reductase 2-hydroxyglutaryl-CoA dehydratase subunit, BcrC BadD HgdB	JAIMBK01	0.667	0	0	0	0.667	0
K20903	Benzoyl-CoA reductase 2-hydroxyglutaryl-CoA dehydratase subunit, BcrC BadD HgdB	JAIMBK01	0.667	0	0	0	0.667	0
K20904	2-hydroxyglutaryl-CoA dehydratase, D-component	JAIMBK01	0.667	0.385	0	0.385	0.667	0
K21559	4Fe-4S binding domain	JAIMBK01	0.667	0	0	0	0.667	0
K22205	S-adenosyl-l-methionine hydroxide adenosyltransferase	JAIMBK01	0.667	0.385	0.385	0	0.667	0
K00033	6-phosphogluconate dehydrogenase, C-terminal domain	JAIMBK01	0.5	0	0	0	0.5	0
K00086	alcohol dehydrogenase	JAIMBK01	0.5	0	0	0	0.5	0
K00260	Belongs to the Glu Leu Phe Val dehydrogenases family	JAIMBK01	0.5	0.385	0	0.385	0.5	0
K00627	S-acyltransferase activity	JAIMBK01	0.5	0.462	0.462	0	0.5	0
K00782	LUD domain	JAIMBK01	0.5	0	0	0	0.5	0
K01007	Pyruvate phosphate dikinase, PEP pyruvate binding	JAIMBK01	0.5	0.462	0	0.462	0.5	0
K01473	COG0145 N-methylhydantoinase A acetone carboxylase, beta subunit	JAIMBK01	0.5	0	0	0	0.5	0
K01474	Hydantoinase B/oxoprolinase	JAIMBK01	0.5	0	0	0	0.5	0
K01620	Threonine aldolase	JAIMBK01	0.5	0	0	0	0.5	0
K01761	PFAM Cys Met metabolism	JAIMBK01	0.5	0	0	0	0.5	0
K01799	Asp/Glu/Hydantoin racemase	JAIMBK01	0.5	0	0	0	0.5	0
K01821	Tautomerase enzyme	JAIMBK01	0.5	0	0	0	0.5	0
K02019	Bacterial regulatory helix-turn-helix protein, lysR family	JAIMBK01	0.5	0.385	0	0.385	0.5	0
K02029	PFAM Extracellular solute-binding protein, family 3	JAIMBK01	0.5	0.077	0	0.077	0.5	0
K02030	PFAM Extracellular solute-binding protein, family 3	JAIMBK01	0.5	0.154	0	0.154	0.5	0
K02032	Belongs to the ABC transporter superfamily	JAIMBK01	0.5	0.231	0	0.231	0.5	0
K02230	PFAM CobN Magnesium Chelatase	JAIMBK01	0.5	0.154	0.154	0	0.5	0
K02246	Putative Competence protein ComGF	JAIMBK01	0.5	0.154	0.154	0	0.5	0
K02279	Flp pilus assembly protein RcpC/CpaB	JAIMBK01	0.5	0.154	0	0.154	0.5	0
K02363	AMP-binding enzyme C-terminal domain	JAIMBK01	0.5	0	0	0	0.5	0
K02475	transcriptional regulatory protein	JAIMBK01	0.5	0	0	0	0.5	0
K02651	PFAM Flp Fap pilin component	JAIMBK01	0.5	0	0	0	0.5	0
K02911	Belongs to the bacterial ribosomal protein bL32 family	JAIMBK01	0.5	0	0	0	0.5	0
K03273	Nucleotidyl transferase	JAIMBK01	0.5	0.154	0	0.154	0.5	0
K03282	Channel that opens in response to stretch forces in the membrane lipid bilayer. May participate in the regulation of osmotic pressure changes within the cell	JAIMBK01	0.5	0.462	0	0.462	0.5	0
K03386	Redoxin	JAIMBK01	0.5	0.154	0	0.154	0.5	0
K03529	nuclear chromosome segregation	JAIMBK01	0.5	0	0	0	0.5	0
K03577	Bacterial regulatory proteins, tetR family	JAIMBK01	0.5	0	0	0	0.5	0
K03924	Associated with various cellular activities	JAIMBK01	0.5	0.462	0.385	0.462	0.5	0
K04116	AMP-binding enzyme C-terminal domain	JAIMBK01	0.5	0	0	0	0.5	0
K04564	Destroys radicals which are normally produced within the cells and which are toxic to biological systems	JAIMBK01	0.5	0.077	0	0.077	0.5	0
K06200	PFAM Carbon starvation protein CstA	JAIMBK01	0.5	0	0	0	0.5	0
K06206	Belongs to the SfsA family	JAIMBK01	0.5	0	0	0	0.5	0
K06350	Allophanate hydrolase subunit 2	JAIMBK01	0.5	0	0	0	0.5	0
K06885	Metal dependent phosphohydrolases with conserved 'HD' motif.	JAIMBK01	0.5	0.462	0.462	0.385	0.5	0
K07150	Na channel or	JAIMBK01	0.5	0	0	0	0.5	0
K07160	Belongs to the UPF0271 (lamB) family	JAIMBK01	0.5	0	0	0	0.5	0
K07484	COG3436 Transposase and inactivated derivatives	JAIMBK01	0.5	0.154	0.154	0.077	0.5	0
K07723	Transcriptional regulator	JAIMBK01	0.5	0	0	0	0.5	0
K08295	AMP-binding enzyme C-terminal domain	JAIMBK01	0.5	0	0	0	0.5	0
K08352	Belongs to the prokaryotic molybdopterin-containing oxidoreductase family	JAIMBK01	0.5	0	0	0	0.5	0
K08369	PFAM General substrate transporter	JAIMBK01	0.5	0	0	0	0.5	0
K08998	Could be involved in insertion of integral membrane proteins into the membrane	JAIMBK01	0.5	0.308	0.308	0	0.5	0
K09004	PFAM DsrE DsrF-like family	JAIMBK01	0.5	0	0	0	0.5	0
K09684	transcriptional regulator	JAIMBK01	0.5	0	0	0	0.5	0
K10027	COG1233 Phytoene dehydrogenase and related proteins	JAIMBK01	0.5	0.385	0.385	0	0.5	0
K10823	Belongs to the ABC transporter superfamily	JAIMBK01	0.5	0	0	0	0.5	0
K11615	transcriptional regulatory protein	JAIMBK01	0.5	0	0	0	0.5	0
K11688	COG1638 TRAP-type C4-dicarboxylate transport system, periplasmic component	JAIMBK01	0.5	0.385	0	0.385	0.5	0
K11689	Trap-type c4-dicarboxylate transport system, small permease component	JAIMBK01	0.5	0.231	0	0.231	0.5	0
K11692	transcriptional regulatory protein	JAIMBK01	0.5	0	0	0	0.5	0
K11712	transcriptional regulatory protein	JAIMBK01	0.5	0	0	0	0.5	0
K12138	HycBCDEFG is part of the formate hydrogenlyase system which is involved in the cleaving of formate to dihydrogen and carbon dioxide	JAIMBK01	0.5	0	0	0	0.5	0
K12139	HycBCDEFG is part of the formate hydrogenlyase system which is involved in the cleaving of formate to dihydrogen and carbon dioxide	JAIMBK01	0.5	0	0	0	0.5	0
K12140	Hydrogenase 4 membrane	JAIMBK01	0.5	0	0	0	0.5	0
K12141	plastoquinone (Complex I)	JAIMBK01	0.5	0	0	0	0.5	0
K12508	AMP-binding enzyme C-terminal domain	JAIMBK01	0.5	0	0	0	0.5	0
K13280	Peptidase S24-like	JAIMBK01	0.5	0.154	0.154	0.077	0.5	0
K13479	CO dehydrogenase flavoprotein C-terminal domain	JAIMBK01	0.5	0	0	0	0.5	0
K13525	Protein tyrosine kinase	JAIMBK01	0.5	0	0	0	0.5	0
K13566	PFAM Nitrilase cyanide hydratase and apolipoprotein N-acyltransferase	JAIMBK01	0.5	0.077	0	0.077	0.5	0
K13766	Belongs to the enoyl-CoA hydratase isomerase family	JAIMBK01	0.5	0	0	0	0.5	0
K14126	Nickel-dependent hydrogenase	JAIMBK01	0.5	0	0	0	0.5	0
K14162	DNA polymerase III alpha subunit	JAIMBK01	0.5	0	0	0	0.5	0
K14205	Catalyzes the transfer of a lysyl group from L-lysyl- tRNA(Lys) to membrane-bound phosphatidylglycerol (PG), which produces lysylphosphatidylglycerol (LPG), a major component of the bacterial membrane with a positive net charge. LPG synthesis contributes to bacterial virulence as it is involved in the resistance mechanism against cationic antimicrobial peptides (CAMP) produces by the host's immun…	JAIMBK01	0.5	0.385	0.231	0.385	0.5	0
K14445	Sodium:sulfate symporter transmembrane region	JAIMBK01	0.5	0.077	0	0.077	0.5	0
K15232	Belongs to the succinate malate CoA ligase beta subunit family	JAIMBK01	0.5	0	0	0	0.5	0
K15829	HycBCDEFG is part of the formate hydrogenlyase system which is involved in the cleaving of formate to dihydrogen and carbon dioxide	JAIMBK01	0.5	0	0	0	0.5	0
K18013	beta-keto acid cleavage enzyme	JAIMBK01	0.5	0	0	0	0.5	0
K19003	PFAM Glycosyl transferase family 2	JAIMBK01	0.5	0	0	0	0.5	0
K19090	TIGRFAM CRISPR-associated protein Cas5 family	JAIMBK01	0.5	0.385	0.231	0.385	0.5	0
K19824	Rubrerythrin	JAIMBK01	0.5	0	0	0	0.5	0
K20534	Glycosyltransferase	JAIMBK01	0.5	0.462	0.462	0.308	0.5	0
K21307	Belongs to the prokaryotic molybdopterin-containing oxidoreductase family	JAIMBK01	0.5	0	0	0	0.5	0
K21405	helix_turn_helix, Lux Regulon	JAIMBK01	0.5	0.154	0	0.154	0.5	0
K21600	negative regulation of transcription, DNA-templated	JAIMBK01	0.5	0	0	0	0.5	0
K21672	Dihydrodipicolinate reductase, N-terminus	JAIMBK01	0.5	0	0	0	0.5	0
K21903	PFAM regulatory protein, ArsR	JAIMBK01	0.5	0.154	0.154	0	0.5	0
K00205	4 iron, 4 sulfur cluster binding	UBA4053	1	0	0	0	0	1
K00991	Catalyzes the formation of 4-diphosphocytidyl-2-C- methyl-D-erythritol from CTP and 2-C-methyl-D-erythritol 4- phosphate (MEP)	UBA4053	1	0.154	0	0.154	0	1
K01186	PFAM Uncharacterised BCR, COG1649	UBA4053	1	0.231	0.231	0	0	1
K01197	PFAM Uncharacterised BCR, COG1649	UBA4053	1	0.231	0.231	0	0	1
K02573	4 iron, 4 sulfur cluster binding	UBA4053	1	0	0	0	0	1
K04115	BadF/BadG/BcrA/BcrD ATPase family	UBA4053	1	0	0	0	0	1
K05988	PFAM Uncharacterised BCR, COG1649	UBA4053	1	0.308	0.308	0	0	1
K06720	Catalyzes the circularization of gamma-N-acetyl- alpha,gamma-diaminobutyric acid (ADABA) to ectoine (1,4,5,6- tetrahydro-2-methyl-4-pyrimidine carboxylic acid), which is an excellent osmoprotectant	UBA4053	1	0.462	0.462	0	0	1
K08679	Polysaccharide biosynthesis protein	UBA4053	1	0.154	0	0.154	0	1
K09680	Protein of unknown function DUF89	UBA4053	1	0	0	0	0	1
K09986	Protein of unknown function (DUF1285)	UBA4053	1	0.231	0.231	0	0	1
K12527	Dihydroprymidine dehydrogenase domain II, 4Fe-4S cluster	UBA4053	1	0.231	0	0.231	0.167	1
K14059	Belongs to the 'phage' integrase family	UBA4053	1	0.462	0.385	0.462	0.167	1
K18197	PFAM Uncharacterised BCR, COG1649	UBA4053	1	0.231	0.231	0	0	1
K19066	PFAM Acyl-CoA dehydrogenase	UBA4053	1	0.333	0	0	0.333	1
K19067	PFAM Acyl-CoA dehydrogenase	UBA4053	1	0.333	0	0	0.333	1
K20276	pathogenesis	UBA4053	1	0.462	0.462	0.385	0.167	1
K01176	PFAM Alpha amylase, catalytic domain	UBA4053	0.5	0.167	0	0	0.167	0.5
K01179	Belongs to the glycosyl hydrolase 30 family	UBA4053	0.5	0.308	0.308	0.308	0	0.5
K01768	CHASE2	UBA4053	0.5	0.462	0.462	0.231	0	0.5
K02025	PFAM binding-protein-dependent transport systems inner membrane component	UBA4053	0.5	0.231	0	0.231	0	0.5
K02046	PFAM Binding-protein-dependent transport system inner membrane component	UBA4053	0.5	0.462	0.462	0.154	0	0.5
K02068	PFAM ABC transporter related	UBA4053	0.5	0.167	0.154	0	0.167	0.5
K02655	Prokaryotic N-terminal methylation motif	UBA4053	0.5	0.077	0.077	0	0	0.5
K07004	5'-nucleotidase, C-terminal domain	UBA4053	0.5	0.167	0.154	0	0.167	0.5
K07133	Psort location Cytoplasmic, score	UBA4053	0.5	0.333	0	0.077	0.333	0.5
K07172	SpoVT / AbrB like domain	UBA4053	0.5	0.333	0.308	0.154	0.333	0.5
K07284	COG3764 Sortase (surface protein transpeptidase)	UBA4053	0.5	0.231	0.231	0	0	0.5
K07480	transposition, DNA-mediated	UBA4053	0.5	0.308	0.308	0	0	0.5
K07814	response regulator	UBA4053	0.5	0.333	0	0.077	0.333	0.5
K08256	Glycosyl transferases group 1	UBA4053	0.5	0.154	0	0.154	0	0.5
K08358	4Fe-4S dicluster domain	UBA4053	0.5	0.077	0	0.077	0	0.5
K09768	Belongs to the UPF0178 family	UBA4053	0.5	0.385	0.385	0.077	0.167	0.5
K12137	PFAM NADH Ubiquinone plastoquinone (complex I)	UBA4053	0.5	0.167	0	0	0.167	0.5
K18122	Acetyl-CoA hydrolase/transferase N-terminal domain	UBA4053	0.5	0.167	0	0.077	0.167	0.5
K18831	Addiction module antidote protein, HigA	UBA4053	0.5	0.385	0	0.385	0	0.5
K19048	transposition, DNA-mediated	UBA4053	0.5	0.231	0.231	0	0	0.5
K19158	YoeB-like toxin of bacterial type II toxin-antitoxin system	UBA4053	0.5	0.385	0	0.385	0	0.5
K20859	DNA polymerase alpha chain like domain	UBA4053	0.5	0.154	0.154	0	0	0.5

## Sheet: S4c_Core_KOs
KO	Function	SCADC1-2-3 prev.	46-80 prev.	JAIMBK01 prev.	UBA4053 prev.
K00003	PFAM Homoserine dehydrogenase	0.769	1	1	1
K00013	Catalyzes the sequential NAD-dependent oxidations of L- histidinol to L-histidinaldehyde and then to L-histidine	0.615	1	0.833	1
K00014	Involved in the biosynthesis of the chorismate, which leads to the biosynthesis of aromatic amino acids. Catalyzes the reversible NADPH linked reduction of 3-dehydroshikimate (DHSA) to yield shikimate (SA)	0.769	0.923	1	0.5
K00030	PFAM isocitrate isopropylmalate dehydrogenase	0.769	0.846	1	0.5
K00053	Involved in the biosynthesis of branched-chain amino acids (BCAA). Catalyzes an alkyl-migration followed by a ketol- acid reduction of (S)-2-acetolactate (S2AL) to yield (R)-2,3- dihydroxy-isovalerate. In the isomerase reaction, S2AL is rearranged via a Mg-dependent methyl migration to produce 3- hydroxy-3-methyl-2-ketobutyrate (HMKB). In the reductase reaction, this 2-ketoacid undergoes a metal-…	0.692	0.923	0.833	1
K00057	PFAM NAD-dependent glycerol-3-phosphate dehydrogenase	0.846	1	1	1
K00058	D-isomer specific 2-hydroxyacid dehydrogenase catalytic	0.769	0.846	1	0.5
K00059	PFAM Short-chain dehydrogenase reductase SDR	1	1	1	1
K00074	3-hydroxyacyl-CoA dehydrogenase, C-terminal domain	0.923	1	1	1
K00075	Cell wall formation	0.846	0.769	1	0.5
K00088	Catalyzes the conversion of inosine 5'-phosphate (IMP) to xanthosine 5'-phosphate (XMP), the first committed and rate- limiting step in the de novo synthesis of guanine nucleotides, and therefore plays an important role in the regulation of cell growth	0.923	0.923	0.833	0.5
K00099	Catalyzes the NADP-dependent rearrangement and reduction of 1-deoxy-D-xylulose-5-phosphate (DXP) to 2-C-methyl-D-erythritol 4-phosphate (MEP)	0.769	0.846	0.833	1
K00123	Pyridine nucleotide-disulphide oxidoreductase	0.615	1	1	0.5
K00133	Catalyzes the NADPH-dependent formation of L-aspartate- semialdehyde (L-ASA) by the reductive dephosphorylation of L- aspartyl-4-phosphate	0.923	0.923	1	0.5
K00134	Belongs to the glyceraldehyde-3-phosphate dehydrogenase family	0.923	0.923	1	0.5
K00147	Catalyzes the NADPH-dependent reduction of L-glutamate 5-phosphate into L-glutamate 5-semialdehyde and phosphate. The product spontaneously undergoes cyclization to form 1-pyrroline-5- carboxylate	0.846	0.923	0.833	0.5
K00174	ferredoxin oxidoreductase	1	0.923	1	1
K00175	PFAM Thiamine pyrophosphate	1	0.923	1	1
K00177	TIGRFAM 2-oxoacid acceptor oxidoreductase, gamma subunit, pyruvate 2-ketoisovalerate	1	0.923	1	1
K00194	CO dehydrogenase acetyl-CoA synthase delta subunit	0.615	0.846	0.833	1
K00197	CO dehydrogenase acetyl-CoA synthase delta subunit	0.538	0.923	0.833	1
K00215	Catalyzes the conversion of 4-hydroxy- tetrahydrodipicolinate (HTPA) to tetrahydrodipicolinate	0.846	0.846	1	1
K00239	TIGRFAM succinate dehydrogenase or fumarate reductase, flavoprotein	0.615	0.923	1	0.5
K00278	Catalyzes the oxidation of L-aspartate to iminoaspartate	0.923	1	0.833	1
K00459	enoyl-(acyl-carrier-protein) reductase II	0.769	0.923	1	1
K00528	Iron-sulfur cluster binding domain of dihydroorotate dehydrogenase B	0.769	0.846	1	0.5
K00548	Pterin binding enzyme	0.769	0.846	0.833	1
K00554	Belongs to the RNA methyltransferase TrmD family	0.846	0.923	0.833	1
K00566	Catalyzes the 2-thiolation of uridine at the wobble position (U34) of tRNA, leading to the formation of s(2)U34	0.923	0.923	1	1
K00590	Belongs to the N(4) N(6)-methyltransferase family	0.846	0.846	0.5	0.5
K00600	Catalyzes the reversible interconversion of serine and glycine with tetrahydrofolate (THF) serving as the one-carbon carrier. This reaction serves as the major source of one-carbon groups required for the biosynthesis of purines, thymidylate, methionine, and other important biomolecules. Also exhibits THF- independent aldolase activity toward beta-hydroxyamino acids, producing glycine and aldehyd…	0.769	0.846	1	1
K00602	Bifunctional purine biosynthesis protein PurH	0.692	1	1	0.5
K00604	Attaches a formyl group to the free amino group of methionyl-tRNA(fMet). The formyl group appears to play a dual role in the initiator identity of N-formylmethionyl-tRNA by promoting its recognition by IF2 and preventing the misappropriation of this tRNA by the elongation apparatus	0.846	1	1	0.5
K00606	Catalyzes the reversible reaction in which hydroxymethyl group from 5,10-methylenetetrahydrofolate is transferred onto alpha-ketoisovalerate to form ketopantoate	0.769	1	1	1
K00609	Belongs to the ATCase OTCase family	0.692	1	1	0.5
K00611	Reversibly catalyzes the transfer of the carbamoyl group from carbamoyl phosphate (CP) to the N(epsilon) atom of ornithine (ORN) to produce L-citrulline	0.846	0.923	0.833	0.5
K00615	Transketolase, central region	1	0.846	1	1
K00616	Transaldolase is important for the balance of metabolites in the pentose-phosphate pathway	1	0.846	1	0.5
K00620	Catalyzes two activities which are involved in the cyclic version of arginine biosynthesis the synthesis of N- acetylglutamate from glutamate and acetyl-CoA as the acetyl donor, and of ornithine by transacetylation between N(2)-acetylornithine and glutamate	0.846	0.769	0.667	0.5
K00626	Thiolase, C-terminal domain	1	1	1	1
K00640	Bacterial transferase hexapeptide (six repeats)	0.769	0.692	1	0.5
K00645	malonyl CoA-acyl carrier protein transacylase	0.769	0.923	1	0.5
K00648	Catalyzes the condensation reaction of fatty acid synthesis by the addition to an acyl acceptor of two carbons from malonyl-ACP. Catalyzes the first condensation reaction which initiates fatty acid synthesis and may therefore play a role in governing the total rate of fatty acid production. Possesses both acetoacetyl-ACP synthase and acetyl transacylase activities. Its substrate specificity deter…	0.769	1	1	0.5
K00655	PFAM Phospholipid glycerol acyltransferase	0.923	0.923	1	1
K00697	PFAM Glycosyl transferase, family 20	1	0.923	1	0.5
K00760	Belongs to the purine pyrimidine phosphoribosyltransferase family	0.846	0.846	1	1
K00762	Catalyzes the transfer of a ribosyl phosphate group from 5-phosphoribose 1-diphosphate to orotate, leading to the formation of orotidine monophosphate (OMP)	0.769	0.846	1	0.5
K00763	Catalyzes the synthesis of beta-nicotinate D- ribonucleotide from nicotinate and 5-phospho-D-ribose 1-phosphate at the expense of ATP	0.769	0.923	1	1
K00764	Catalyzes the formation of phosphoribosylamine from phosphoribosylpyrophosphate (PRPP) and glutamine	0.846	0.846	0.667	0.5
K00766	Catalyzes the transfer of the phosphoribosyl group of 5- phosphorylribose-1-pyrophosphate (PRPP) to anthranilate to yield N-(5'-phosphoribosyl)-anthranilate (PRA)	1	1	0.833	0.5
K00767	Belongs to the NadC ModD family	0.923	1	1	1
K00772	Phosphorylase superfamily	0.846	1	1	0.5
K00788	Condenses 4-methyl-5-(beta-hydroxyethyl)thiazole monophosphate (THZ-P) and 2-methyl-4-amino-5-hydroxymethyl pyrimidine pyrophosphate (HMP-PP) to form thiamine monophosphate (TMP)	0.923	0.923	0.833	0.5
K00789	Catalyzes the formation of S-adenosylmethionine (AdoMet) from methionine and ATP. The overall synthetic reaction is composed of two sequential steps, AdoMet formation and the subsequent tripolyphosphate hydrolysis which occurs prior to release of AdoMet from the enzyme	0.615	0.923	1	0.5
K00790	Cell wall formation. Adds enolpyruvyl to UDP-N- acetylglucosamine	0.846	0.923	1	1
K00791	Catalyzes the transfer of a dimethylallyl group onto the adenine at position 37 in tRNAs that read codons beginning with uridine, leading to the formation of N6-(dimethylallyl)adenosine (i(6)A)	0.923	0.923	1	0.5
K00793	TIGRFAM riboflavin synthase, alpha subunit	0.923	1	1	0.5
K00794	Catalyzes the formation of 6,7-dimethyl-8- ribityllumazine by condensation of 5-amino-6-(D- ribitylamino)uracil with 3,4-dihydroxy-2-butanone 4-phosphate. This is the penultimate step in the biosynthesis of riboflavin	0.692	0.846	1	0.5
K00796	dihydropteroate synthase	1	1	0.833	0.5
K00800	Catalyzes the transfer of the enolpyruvyl moiety of phosphoenolpyruvate (PEP) to the 5-hydroxyl of shikimate-3- phosphate (S3P) to produce enolpyruvyl shikimate-3-phosphate and inorganic phosphate	0.923	0.923	1	1
K00806	Catalyzes the condensation of isopentenyl diphosphate (IPP) with allylic pyrophosphates generating different type of terpenoids	0.846	0.769	1	1
K00812	PFAM Aminotransferase class I and II	0.692	1	1	1
K00817	Belongs to the class-II pyridoxal-phosphate-dependent aminotransferase family. Histidinol-phosphate aminotransferase subfamily	0.769	1	1	0.5
K00821	PFAM Aminotransferase class-III	1	1	1	1
K00826	Belongs to the class-IV pyridoxal-phosphate-dependent aminotransferase family	0.769	0.846	0.833	1
K00845	PFAM ROK family protein	0.769	1	0.833	0.5
K00859	Catalyzes the phosphorylation of the 3'-hydroxyl group of dephosphocoenzyme A to form coenzyme A	0.923	0.846	1	0.5
K00872	Catalyzes the ATP-dependent phosphorylation of L- homoserine to L-homoserine phosphate	0.769	1	1	1
K00927	Belongs to the phosphoglycerate kinase family	1	0.923	1	0.5
K00928	Belongs to the aspartokinase family	0.923	0.923	1	1
K00930	Belongs to the acetylglutamate kinase family. ArgB subfamily	0.769	0.846	0.833	0.5
K00931	Catalyzes the transfer of a phosphate group to glutamate to form L-glutamate 5-phosphate	0.923	0.846	1	0.5
K00939	Catalyzes the reversible transfer of the terminal phosphate group between ATP and AMP. Plays an important role in cellular energy homeostasis and in adenine nucleotide metabolism	0.769	0.923	1	0.5
K00942	Essential for recycling GMP and indirectly, cGMP	0.923	0.923	0.833	1
K00943	Phosphorylation of dTMP to form dTDP in both de novo and salvage pathways of dTTP synthesis	0.846	0.923	1	1
K00945	Belongs to the cytidylate kinase family. Type 1 subfamily	0.923	0.769	1	1
K00946	Catalyzes the ATP-dependent phosphorylation of thiamine- monophosphate (TMP) to form thiamine-pyrophosphate (TPP), the active form of vitamin B1	0.692	0.923	0.667	0.5
K00948	Involved in the biosynthesis of the central metabolite phospho-alpha-D-ribosyl-1-pyrophosphate (PRPP) via the transfer of pyrophosphoryl group from ATP to 1-hydroxyl of ribose-5-phosphate (Rib-5-P)	0.769	0.923	1	1
K00950	PFAM 7,8-Dihydro-6-hydroxymethylpterin-pyrophosphokinase, HPPK	1	1	1	1
K00951	In eubacteria ppGpp (guanosine 3'-diphosphate 5-' diphosphate) is a mediator of the stringent response that coordinates a variety of cellular activities in response to changes in nutritional abundance	0.846	0.923	0.833	0.5
K00954	Reversibly transfers an adenylyl group from ATP to 4'- phosphopantetheine, yielding dephospho-CoA (dPCoA) and pyrophosphate	1	1	1	1
K00962	Involved in mRNA degradation. Catalyzes the phosphorolysis of single-stranded polyribonucleotides processively in the 3'- to 5'-direction	0.923	0.923	0.833	1
K00963	TIGRFAM UTP--glucose-1-phosphate uridylyltransferase	1	0.923	1	1
K00966	alpha beta alpha domain I	0.846	0.923	0.833	0.5
K00969	Catalyzes the reversible adenylation of nicotinate mononucleotide (NaMN) to nicotinic acid adenine dinucleotide (NaAD)	0.692	0.923	0.833	0.5
K00970	metal-dependent phosphohydrolase HD sub	1	0.846	1	0.5
K00974	tRNA nucleotidyltransferase poly(A) polymerase	1	0.846	1	0.5
K00981	Belongs to the CDS family	0.769	0.846	1	1
K00997	Transfers the 4'-phosphopantetheine moiety from coenzyme A to a Ser of acyl-carrier-protein	0.923	1	1	0.5
K01000	First step of the lipid cycle reactions in the biosynthesis of the cell wall peptidoglycan	0.769	0.846	1	0.5
K01006	Belongs to the PEP-utilizing enzyme family	0.923	0.923	1	0.5
K01008	Synthesizes selenophosphate from selenide and ATP	0.692	0.923	1	1
K01012	PFAM Radical SAM	0.769	0.923	0.667	1
K01042	Converts seryl-tRNA(Sec) to selenocysteinyl-tRNA(Sec) required for selenoprotein biosynthesis	0.769	0.923	0.833	0.5
K01056	The natural substrate for this enzyme may be peptidyl- tRNAs which drop off the ribosome during protein synthesis	0.769	0.846	0.833	0.5
K01087	Removes the phosphate from trehalose 6-phosphate to produce free trehalose	0.923	0.692	1	1
K01091	TIGRFAM HAD-superfamily hydrolase, subfamily IA, variant 3	0.615	1	1	0.5
K01104	Low molecular weight phosphotyrosine protein phosphatase	0.692	1	1	1
K01151	PFAM Xylose isomerase-like TIM barrel	1	0.769	1	0.5
K01159	Nuclease that resolves Holliday junction intermediates in genetic recombination. Cleaves the cruciform structure in supercoiled DNA by nicking to strands with the same polarity at sites symmetrically opposed at the junction in the homologous arms and leaves a 5'-terminal phosphate and a 3'-terminal hydroxyl group	0.846	0.846	1	1
K01262	PFAM peptidase M24	0.769	1	0.833	1
K01265	TIGRFAM methionine aminopeptidase, type I	0.769	1	0.833	1
K01271	PFAM peptidase M24	0.769	1	0.833	1
K01338	ATP-dependent serine protease that mediates the selective degradation of mutant and abnormal proteins as well as certain short-lived regulatory proteins. Required for cellular homeostasis and for survival from DNA damage and developmental changes induced by stress. Degrades polypeptides processively to yield small peptide fragments that are 5 to 10 amino acids long. Binds to DNA in a double-stran…	1	1	1	1
K01356	Represses a number of genes involved in the response to DNA damage (SOS response), including recA and lexA. In the presence of single-stranded DNA, RecA interacts with LexA causing an autocatalytic cleavage which disrupts the DNA-binding part of LexA, leading to derepression of the SOS regulon and eventually DNA repair	0.692	0.923	1	0.5
K01358	Cleaves peptides in various proteins in a process that requires ATP hydrolysis. Has a chymotrypsin-like activity. Plays a major role in the degradation of misfolded proteins	0.846	0.923	0.833	0.5
K01409	Required for the formation of a threonylcarbamoyl group on adenosine at position 37 (t(6)A37) in tRNAs that read codons beginning with adenine. Is involved in the transfer of the threonylcarbamoyl moiety of threonylcarbamoyl-AMP (TC-AMP) to the N6 group of A37, together with TsaE and TsaB. TsaD likely plays a direct catalytic role in this reaction	0.692	1	1	1
K01419	Protease subunit of a proteasome-like degradation complex believed to be a general protein degrading machinery	0.923	1	1	0.5
K01448	PFAM cell wall hydrolase autolysin	1	1	1	1
K01449	Cell wall hydrolase	1	0.923	1	1
K01462	Removes the formyl group from the N-terminal Met of newly synthesized proteins. Requires at least a dipeptide for an efficient rate of reaction. N-terminal L-methionine is a prerequisite for activity but the enzyme has broad specificity at other positions	0.846	1	0.833	1
K01465	Belongs to the metallo-dependent hydrolases superfamily. DHOase family. Class I DHOase subfamily	0.769	1	0.833	0.5
K01486	Belongs to the metallo-dependent hydrolases superfamily. Adenine deaminase family	0.615	1	0.833	0.5
K01493	PFAM Cytidine and deoxycytidylate deaminase zinc-binding region	0.846	0.846	0.833	1
K01495	PFAM GTP cyclohydrolase I	0.923	0.846	1	0.5
K01496	belongs to the PRA-CH family	0.846	1	1	0.5
K01512	Acylphosphatase	0.615	1	0.667	1
K01520	This enzyme is involved in nucleotide metabolism it produces dUMP, the immediate precursor of thymidine nucleotides and it decreases the intracellular concentration of dUTP so that uracil cannot be incorporated into DNA	0.923	0.615	0.833	0.5
K01524	Ppx GppA phosphatase	0.846	1	0.833	0.5
K01567	PFAM Polysaccharide deacetylase	0.846	1	0.833	0.5
K01572	TIGRFAM sodium ion-translocating decarboxylase, beta subunit	0.846	0.923	0.833	0.5
K01579	Catalyzes the pyruvoyl-dependent decarboxylation of aspartate to produce beta-alanine	0.769	1	1	1
K01582	Orn Lys Arg decarboxylase major	0.923	0.923	1	1
K01583	Orn Lys Arg decarboxylase major	0.923	0.923	1	1
K01585	Orn Lys Arg decarboxylase major	0.923	0.923	1	1
K01586	Specifically catalyzes the decarboxylation of meso- diaminopimelate (meso-DAP) to L-lysine	0.923	0.846	0.667	0.5
K01588	Catalyzes the conversion of N5-carboxyaminoimidazole ribonucleotide (N5-CAIR) to 4-carboxy-5-aminoimidazole ribonucleotide (CAIR)	0.846	0.846	1	1
K01591	Catalyzes the decarboxylation of orotidine 5'- monophosphate (OMP) to uridine 5'-monophosphate (UMP)	0.923	0.769	0.833	0.5
K01598	Catalyzes two steps in the biosynthesis of coenzyme A. In the first step cysteine is conjugated to 4'-phosphopantothenate to form 4-phosphopantothenoylcysteine, in the latter compound is decarboxylated to form 4'-phosphopantotheine	0.923	1	1	1
K01609	Belongs to the TrpC family	0.923	1	0.833	0.5
K01611	Catalyzes the decarboxylation of S-adenosylmethionine to S-adenosylmethioninamine (dcAdoMet), the propylamine donor required for the synthesis of the polyamines spermine and spermidine from the diamine putrescine	0.769	0.846	1	0.5
K01624	Fructose-1,6-bisphosphate aldolase, class II	1	0.769	1	0.5
K01649	Belongs to the alpha-IPM synthase homocitrate synthase family	1	1	1	1
K01653	TIGRFAM Acetolactate synthase, small subunit	0.923	0.846	1	0.5
K01657	Part of a heterotetrameric complex that catalyzes the two-step biosynthesis of anthranilate, an intermediate in the biosynthesis of L-tryptophan. In the first step, the glutamine- binding beta subunit (TrpG) of anthranilate synthase (AS) provides the glutamine amidotransferase activity which generates ammonia as a substrate that, along with chorismate, is used in the second step, catalyzed by the…	0.923	1	0.833	1
K01658	TIGRFAM glutamine amidotransferase of anthranilate synthase	0.846	0.923	0.833	0.5
K01664	TIGRFAM glutamine amidotransferase of anthranilate synthase	0.923	0.923	0.833	0.5
K01665	Part of a heterotetrameric complex that catalyzes the two-step biosynthesis of anthranilate, an intermediate in the biosynthesis of L-tryptophan. In the first step, the glutamine- binding beta subunit (TrpG) of anthranilate synthase (AS) provides the glutamine amidotransferase activity which generates ammonia as a substrate that, along with chorismate, is used in the second step, catalyzed by the…	0.923	1	0.833	1
K01693	PFAM Imidazoleglycerol-phosphate dehydratase	0.769	1	0.833	1
K01695	The alpha subunit is responsible for the aldol cleavage of indoleglycerol phosphate to indole and glyceraldehyde 3- phosphate	0.846	0.846	1	0.5
K01696	The beta subunit is responsible for the synthesis of L- tryptophan from indole and L-serine	0.692	0.615	1	0.5
K01698	Belongs to the ALAD family	0.692	0.846	0.833	0.5
K01703	Catalyzes the isomerization between 2-isopropylmalate and 3-isopropylmalate, via the formation of 2-isopropylmaleate	0.846	0.923	0.667	0.5
K01704	Catalyzes the isomerization between 2-isopropylmalate and 3-isopropylmalate, via the formation of 2-isopropylmaleate	0.846	1	0.5	0.5
K01710	dehydratase	0.769	0.692	0.667	0.5
K01714	Catalyzes the condensation of (S)-aspartate-beta- semialdehyde (S)-ASA and pyruvate to 4-hydroxy- tetrahydrodipicolinate (HTPA)	0.923	0.923	1	1
K01715	Belongs to the enoyl-CoA hydratase isomerase family	0.769	0.923	1	1
K01735	Catalyzes the conversion of 3-deoxy-D-arabino- heptulosonate 7-phosphate (DAHP) to dehydroquinate (DHQ)	0.846	1	0.667	1
K01736	Catalyzes the anti-1,4-elimination of the C-3 phosphate and the C-6 proR hydrogen from 5-enolpyruvylshikimate-3-phosphate (EPSP) to yield chorismate, which is the branch point compound that serves as the starting substrate for the three terminal pathways of aromatic amino acid biosynthesis. This reaction introduces a second double bond into the aromatic ring system	0.769	0.923	1	1
K01737	PFAM 6-pyruvoyl tetrahydropterin	0.923	0.923	0.833	0.5
K01756	Belongs to the lyase 1 family. Adenylosuccinate lyase subfamily	0.846	0.923	0.833	0.5
K01770	Involved in the biosynthesis of isopentenyl diphosphate (IPP) and dimethylallyl diphosphate (DMAPP), two major building blocks of isoprenoid compounds. Catalyzes the conversion of 4- diphosphocytidyl-2-C-methyl-D-erythritol 2-phosphate (CDP-ME2P) to 2-C-methyl-D-erythritol 2,4-cyclodiphosphate (ME-CPP) with a corresponding release of cytidine 5-monophosphate (CMP)	1	1	1	1
K01776	Provides the (R)-glutamate required for cell wall biosynthesis	0.923	0.846	1	1
K01778	Catalyzes the stereoinversion of LL-2,6- diaminoheptanedioate (L,L-DAP) to meso-diaminoheptanedioate (meso- DAP), a precursor of L-lysine and an essential component of the bacterial peptidoglycan	0.769	1	1	1
K01783	Belongs to the ribulose-phosphate 3-epimerase family	0.923	0.923	1	0.5
K01784	PFAM NAD-dependent epimerase dehydratase	1	0.923	0.833	1
K01791	Belongs to the UDP-N-acetylglucosamine 2-epimerase family	0.923	0.923	0.667	0.5
K01803	Involved in the gluconeogenesis. Catalyzes stereospecifically the conversion of dihydroxyacetone phosphate (DHAP) to D-glyceraldehyde-3-phosphate (G3P)	1	0.923	1	0.5
K01808	PFAM Ribose galactose isomerase	0.692	0.846	0.833	1
K01814	TIGRFAM Phosphoribosylformimino-5-aminoimidazole carboxamide ribotide isomerase	0.769	1	1	1
K01817	Belongs to the TrpF family	0.923	1	0.667	0.5
K01839	Phosphotransfer between the C1 and C5 carbon atoms of pentose	0.923	0.846	1	0.5
K01845	PFAM Aminotransferase class-III	0.692	0.846	0.833	0.5
K01866	Catalyzes the attachment of tyrosine to tRNA(Tyr) in a two-step reaction tyrosine is first activated by ATP to form Tyr- AMP and then transferred to the acceptor end of tRNA(Tyr)	0.615	1	0.667	1
K01867	TIGRFAM Tryptophanyl-tRNA synthetase	1	0.846	1	0.5
K01868	Catalyzes the attachment of threonine to tRNA(Thr) in a two-step reaction L-threonine is first activated by ATP to form Thr-AMP and then transferred to the acceptor end of tRNA(Thr)	0.615	0.923	0.833	1
K01869	Belongs to the class-I aminoacyl-tRNA synthetase family	0.615	0.923	1	0.5
K01872	Catalyzes the attachment of alanine to tRNA(Ala) in a two-step reaction alanine is first activated by ATP to form Ala- AMP and then transferred to the acceptor end of tRNA(Ala). Also edits incorrectly charged Ser-tRNA(Ala) and Gly-tRNA(Ala) via its editing domain	1	0.923	0.833	1
K01874	Is required not only for elongation of protein synthesis but also for the initiation of all mRNA translation through initiator tRNA(fMet) aminoacylation	0.923	0.923	1	0.5
K01876	L-aspartate is first activated by ATP to form Asp-AMP and then transferred to the acceptor end of tRNA(Asp	0.769	1	0.667	0.5
K01878	PFAM glycyl-tRNA synthetase alpha subunit	0.769	0.923	0.833	1
K01879	Glycyl-tRNA synthetase beta subunit	0.769	1	0.833	1
K01881	Catalyzes the attachment of proline to tRNA(Pro) in a two-step reaction proline is first activated by ATP to form Pro- AMP and then transferred to the acceptor end of tRNA(Pro). As ProRS can inadvertently accommodate and process non-cognate amino acids such as alanine and cysteine, to avoid such errors it has two additional distinct editing activities against alanine. One activity is designated a…	0.923	0.846	1	1
K01883	Belongs to the class-I aminoacyl-tRNA synthetase family	0.923	1	1	0.5
K01885	Catalyzes the attachment of glutamate to tRNA(Glu) in a two-step reaction glutamate is first activated by ATP to form Glu-AMP and then transferred to the acceptor end of tRNA(Glu)	0.769	0.846	1	0.5
K01887	TIGRFAM Arginyl-tRNA synthetase	0.923	0.846	1	0.5
K01889	Belongs to the class-II aminoacyl-tRNA synthetase family. Phe-tRNA synthetase alpha subunit type 1 subfamily	0.846	0.846	1	0.5
K01890	Belongs to the phenylalanyl-tRNA synthetase beta subunit family. Type 1 subfamily	0.615	0.923	1	1
K01892	tRNA synthetase class II core domain (G, H, P, S and T)	0.769	1	0.833	0.5
K01895	Catalyzes the conversion of acetate into acetyl-CoA (AcCoA), an essential intermediate at the junction of anabolic and catabolic pathways. AcsA undergoes a two-step reaction. In the first half reaction, AcsA combines acetate with ATP to form acetyl-adenylate (AcAMP) intermediate. In the second half reaction, it can then transfer the acetyl group from AcAMP to the sulfhydryl group of CoA, forming …	1	0.923	1	0.5
K01897	Acyl-CoA synthetase (AMP-forming) AMP-acid ligase II	0.769	1	1	1
K01905	ATP-grasp domain	0.923	0.923	1	1
K01915	TIGRFAM glutamine synthetase, type I	1	1	1	0.5
K01918	Catalyzes the condensation of pantoate with beta-alanine in an ATP-dependent reaction via a pantoyl-adenylate intermediate	0.769	1	1	1
K01921	Belongs to the D-alanine--D-alanine ligase family	0.846	1	0.833	1
K01923	phosphoribosylaminoimidazolesuccinocarboxamide synthase activity	0.923	0.923	1	1
K01924	Belongs to the MurCDEF family	0.846	0.846	1	0.5
K01925	Cell wall formation. Catalyzes the addition of glutamate to the nucleotide precursor UDP-N-acetylmuramoyl-L-alanine (UMA)	0.538	0.769	1	0.5
K01928	Catalyzes the addition of meso-diaminopimelic acid to the nucleotide precursor UDP-N-acetylmuramoyl-L-alanyl-D-glutamate (UMAG) in the biosynthesis of bacterial cell-wall peptidoglycan	0.846	0.923	1	0.5
K01929	Involved in cell wall formation. Catalyzes the final step in the synthesis of UDP-N-acetylmuramoyl-pentapeptide, the precursor of murein	0.769	0.846	0.833	0.5
K01933	PFAM AIR synthase related protein	0.692	0.923	1	0.5
K01934	PFAM 5-formyltetrahydrofolate cyclo-ligase	0.692	0.538	0.833	1
K01937	Catalyzes the ATP-dependent amination of UTP to CTP with either L-glutamine or ammonia as the source of nitrogen. Regulates intracellular CTP levels through interactions with the four ribonucleotide triphosphates	1	0.923	0.833	0.5
K01939	Plays an important role in the de novo pathway of purine nucleotide biosynthesis. Catalyzes the first committed step in the biosynthesis of AMP from IMP	1	0.923	0.833	0.5
K01940	Belongs to the argininosuccinate synthase family. Type 1 subfamily	0.846	0.615	1	0.5
K01945	Belongs to the GARS family	0.615	1	0.833	1
K01950	Catalyzes the ATP-dependent amidation of deamido-NAD to form NAD. Uses L-glutamine as a nitrogen source	0.846	0.923	1	0.5
K01951	Catalyzes the synthesis of GMP from XMP	0.846	0.769	1	1
K01952	Part of the phosphoribosylformylglycinamidine synthase complex involved in the purines biosynthetic pathway. Catalyzes the ATP-dependent conversion of formylglycinamide ribonucleotide (FGAR) and glutamine to yield formylglycinamidine ribonucleotide (FGAM) and glutamate. The FGAM synthase complex is composed of three subunits. PurQ produces an ammonia molecule by converting glutamine to glutamate.…	0.846	0.846	1	0.5
K01953	Asparagine synthase	0.846	1	1	0.5
K01966	acetyl-CoA carboxylase, carboxyltransferase component (subunits alpha and beta)	1	1	1	1
K01972	DNA ligase that catalyzes the formation of phosphodiester linkages between 5'-phosphoryl and 3'-hydroxyl groups in double-stranded DNA using NAD as a coenzyme and as the energy source for the reaction. It is essential for DNA replication and repair of damaged DNA	0.923	1	0.667	0.5
K01975	Hydrolyzes RNA 2',3'-cyclic phosphodiester to an RNA 2'- phosphomonoester	0.923	1	0.5	0.5
K01990	AAA domain, putative AbiEii toxin, Type IV TA system	1	1	1	0.5
K01992	PFAM ABC-2 type transporter	1	0.923	1	0.5
K01993	PFAM secretion protein HlyD family protein	0.692	0.692	0.5	0.5
K02003	ABC transporter	0.923	0.846	0.833	0.5
K02004	ABC-type antimicrobial peptide transport system, permease component	1	0.923	0.833	0.5
K02005	Belongs to the membrane fusion protein (MFP) (TC 8.A.1) family	0.923	0.923	0.833	0.5
K02036	Part of the ABC transporter complex PstSACB involved in phosphate import. Responsible for energy coupling to the transport system	1	0.923	1	0.5
K02037	probably responsible for the translocation of the substrate across the membrane	1	1	0.833	0.5
K02038	PFAM binding-protein-dependent transport systems inner membrane component	1	1	0.667	1
K02039	Plays a role in the regulation of phosphate uptake	1	0.846	1	0.5
K02040	TIGRFAM phosphate binding protein	1	0.923	1	1
K02051	ABC-type nitrate sulfonate bicarbonate transport system, periplasmic component	0.846	0.923	1	0.5
K02076	PFAM ferric-uptake regulator	0.769	0.615	0.833	0.5
K02078	Carrier of the growing fatty acid chain in fatty acid biosynthesis	0.769	1	1	0.5
K02086	PFAM Replication initiation and membrane attachment protein (DnaB)	0.923	1	1	0.5
K02182	Acyl-CoA synthetase (AMP-forming) AMP-acid ligase II	0.769	0.923	1	1
K02226	Belongs to the phosphoglycerate mutase family	0.846	0.769	1	1
K02237	TIGRFAM Competence protein ComEA, helix-hairpin-helix	0.769	0.846	1	0.5
K02238	PFAM Metallo-beta-lactamase superfamily	0.769	1	1	1
K02242	PFAM Phosphoribosyltransferase	0.615	1	0.833	0.5
K02313	it binds specifically double-stranded DNA at a 9 bp consensus (dnaA box) 5'-TTATC CA A CA A-3'. DnaA binds to ATP and to acidic phospholipids	0.615	0.769	0.833	0.5
K02314	Participates in initiation and elongation during chromosome replication	0.769	1	0.833	1
K02315	SMART AAA ATPase	1	1	0.833	1
K02316	RNA polymerase that catalyzes the synthesis of short RNA molecules used as primers for DNA polymerase during DNA replication	0.923	1	1	1
K02335	In addition to polymerase activity, this DNA polymerase exhibits 5'-3' exonuclease activity	0.846	0.923	1	1
K02337	DNA polymerase III alpha subunit	1	1	1	0.5
K02338	Confers DNA tethering and processivity to DNA polymerases and other proteins. Acts as a clamp, forming a ring around DNA (a reaction catalyzed by the clamp-loading complex) which diffuses in an ATP-independent manner freely and bidirectionally along dsDNA. Initially characterized for its ability to contact the catalytic subunit of DNA polymerase III (Pol III), a complex, multichain enzyme respons…	0.692	0.769	1	0.5
K02340	TIGRFAM DNA polymerase III, delta subunit	0.692	0.923	1	0.5
K02341	TIGRFAM DNA polymerase III, delta prime subunit	1	0.923	1	1
K02343	DNA polymerase III is a complex, multichain enzyme responsible for most of the replicative synthesis in bacteria. This DNA polymerase also exhibits 3' to 5' exonuclease activity	0.923	0.769	0.833	0.5
K02355	TIGRFAM Translation elongation factor	1	1	1	1
K02356	Involved in peptide bond synthesis. Stimulates efficient translation and peptide-bond synthesis on native or reconstituted 70S ribosomes in vitro. Probably functions indirectly by altering the affinity of the ribosome for aminoacyl-tRNA, thus increasing their reactivity as acceptors for peptidyl transferase	0.692	1	0.833	1
K02357	Associates with the EF-Tu.GDP complex and induces the exchange of GDP to GTP. It remains bound to the aminoacyl-tRNA.EF- Tu.GTP complex up to the GTP hydrolysis stage on the ribosome	0.846	0.846	0.833	0.5
K02358	This protein promotes the GTP-dependent binding of aminoacyl-tRNA to the A-site of ribosomes during protein biosynthesis	0.923	0.923	0.667	1
K02371	enoyl-(acyl-carrier-protein) reductase II	0.846	1	1	1
K02379	Required for formate dehydrogenase (FDH) activity. Acts as a sulfur carrier protein that transfers sulfur from IscS to the molybdenum cofactor prior to its insertion into FDH	0.769	0.923	1	1
K02392	basal body rod protein	0.769	0.615	1	0.5
K02404	Flagellar biosynthetic protein FlhF	0.692	0.615	1	0.5
K02405	TIGRFAM RNA polymerase sigma factor, FliA WhiG	0.692	0.615	1	0.5
K02416	flagellar motor switch protein FliM	0.692	0.615	1	0.5
K02417	PFAM surface presentation of antigens (SPOA)	0.769	0.615	1	0.5
K02428	Pyrophosphatase that catalyzes the hydrolysis of nucleoside triphosphates to their monophosphate derivatives, with a high preference for the non-canonical purine nucleotides XTP (xanthosine triphosphate), dITP (deoxyinosine triphosphate) and ITP. Seems to function as a house-cleaning enzyme that removes non-canonical purine nucleotides from the nucleotide pool, thus preventing their incorporation…	1	1	1	1
K02433	Allows the formation of correctly charged Gln-tRNA(Gln) through the transamidation of misacylated Glu-tRNA(Gln) in organisms which lack glutaminyl-tRNA synthetase. The reaction takes place in the presence of glutamine and ATP through an activated gamma-phospho-Glu-tRNA(Gln)	0.846	1	1	1
K02434	Allows the formation of correctly charged Asn-tRNA(Asn) or Gln-tRNA(Gln) through the transamidation of misacylated Asp- tRNA(Asn) or Glu-tRNA(Gln) in organisms which lack either or both of asparaginyl-tRNA or glutaminyl-tRNA synthetases. The reaction takes place in the presence of glutamine and ATP through an activated phospho-Asp-tRNA(Asn) or phospho-Glu-tRNA(Gln)	0.846	0.846	1	1
K02435	Allows the formation of correctly charged Asn-tRNA(Asn) or Gln-tRNA(Gln) through the transamidation of misacylated Asp- tRNA(Asn) or Glu-tRNA(Gln) in organisms which lack either or both of asparaginyl-tRNA or glutaminyl-tRNA synthetases. The reaction takes place in the presence of glutamine and ATP through an activated phospho-Asp-tRNA(Asn) or phospho-Glu-tRNA(Gln)	0.769	0.923	0.833	0.5
K02456	general secretion pathway protein	0.846	0.538	0.5	0.5
K02469	A type II topoisomerase that negatively supercoils closed circular double-stranded (ds) DNA in an ATP-dependent manner to modulate DNA topology and maintain chromosomes in an underwound state. Negative supercoiling favors strand separation, and DNA replication, transcription, recombination and repair, all of which involve strand separation. Also able to catalyze the interconversion of other topol…	0.769	0.846	1	0.5
K02483	PFAM response regulator receiver	0.923	1	1	1
K02490	response regulator receiver	1	0.923	1	0.5
K02493	Methylates the class 1 translation termination release factors RF1 PrfA and RF2 PrfB on the glutamine residue of the universally conserved GGQ motif	1	0.923	0.833	1
K02499	TIGRFAM MazG family protein	0.769	0.923	0.833	1
K02500	IGPS catalyzes the conversion of PRFAR and glutamine to IGP, AICAR and glutamate. The HisF subunit catalyzes the cyclization activity that produces IGP and AICAR from PRFAR using the ammonia provided by the HisH subunit	0.846	1	1	1
K02501	IGPS catalyzes the conversion of PRFAR and glutamine to IGP, AICAR and glutamate. The HisH subunit provides the glutamine amidotransferase activity that produces the ammonia necessary to HisF for the synthesis of IGP and AICAR	0.846	1	1	1
K02518	One of the essential components for the initiation of protein synthesis. Stabilizes the binding of IF-2 and IF-3 on the 30S subunit to which N-formylmethionyl-tRNA(fMet) subsequently binds. Helps modulate mRNA selection, yielding the 30S pre- initiation complex (PIC). Upon addition of the 50S ribosomal subunit IF-1, IF-2 and IF-3 are released leaving the mature 70S translation initation complex	0.769	1	1	1
K02519	One of the essential components for the initiation of protein synthesis. Protects formylmethionyl-tRNA from spontaneous hydrolysis and promotes its binding to the 30S ribosomal subunits. Also involved in the hydrolysis of GTP during the formation of the 70S ribosomal complex	0.923	0.846	1	0.5
K02520	IF-3 binds to the 30S ribosomal subunit and shifts the equilibrum between 70S ribosomes and their 50S and 30S subunits in favor of the free subunits, thus enhancing the availability of 30S subunits on which protein synthesis initiation begins	0.923	0.923	0.833	0.5
K02528	Specifically dimethylates two adjacent adenosines (A1518 and A1519) in the loop of a conserved hairpin near the 3'-end of 16S rRNA in the 30S particle. May play a critical role in biogenesis of 30S subunits	0.846	1	1	0.5
K02594	Belongs to the alpha-IPM synthase homocitrate synthase family	0.923	0.846	0.833	0.5
K02600	Participates in both transcription termination and antitermination	0.923	0.846	1	0.5
K02601	Participates in transcription elongation, termination and antitermination	0.692	1	0.833	1
K02626	PFAM Pyruvoyl-dependent arginine decarboxylase	1	1	1	0.5
K02654	Cleaves type-4 fimbrial leader sequence and methylates the N-terminal (generally Phe) residue	0.846	0.692	0.833	0.5
K02662	Type IV pilus assembly protein PilM	0.769	0.615	0.833	0.5
K02663	PFAM Fimbrial assembly	0.769	0.538	0.5	0.5
K02825	Also displays a weak uracil phosphoribosyltransferase activity which is not physiologically significant	0.846	1	0.833	0.5
K02834	One of several proteins that assist in the late maturation steps of the functional core of the 30S ribosomal subunit. Associates with free 30S ribosomal subunits (but not with 30S subunits that are part of 70S ribosomes or polysomes). Required for efficient processing of 16S rRNA. May interact with the 5'-terminal helix region of 16S rRNA	0.923	0.846	0.833	0.5
K02835	Peptide chain release factor 1 directs the termination of translation in response to the peptide chain termination codons UAG and UAA	1	0.923	1	1
K02836	Peptide chain release factor 2 directs the termination of translation in response to the peptide chain termination codons UGA and UAA	0.923	0.769	0.833	1
K02838	Responsible for the release of ribosomes from messenger RNA at the termination of protein biosynthesis. May increase the efficiency of translation by recycling ribosomes from one round of translation to another	0.846	0.846	1	0.5
K02851	PFAM Glycosyl transferase family 4	1	0.846	1	1
K02860	An accessory protein needed during the final step in the assembly of 30S ribosomal subunit, possibly for assembly of the head region. Probably interacts with S19. Essential for efficient processing of 16S rRNA. May be needed both before and after RbfA during the maturation of 16S rRNA. It has affinity for free ribosomal 30S subunits but not for 70S ribosomes	0.846	0.923	0.667	1
K02863	Binds directly to 23S rRNA. The L1 stalk is quite mobile in the ribosome, and is involved in E site tRNA release	0.692	1	1	1
K02864	Forms part of the ribosomal stalk, playing a central role in the interaction of the ribosome with GTP-bound translation factors	0.692	0.923	0.833	1
K02867	Forms part of the ribosomal stalk which helps the ribosome interact with GTP-bound translation factors	0.692	1	1	1
K02871	This protein is one of the early assembly proteins of the 50S ribosomal subunit, although it is not seen to bind rRNA by itself. It is important during the early stages of 50S assembly	0.846	1	1	1
K02874	Binds to 23S rRNA. Forms part of two intersubunit bridges in the 70S ribosome	0.692	0.923	1	0.5
K02876	Binds to the 23S rRNA	0.846	1	1	0.5
K02878	Binds 23S rRNA and is also seen to make contacts with the A and possibly P site tRNAs	0.923	0.923	1	0.5
K02879	PFAM ribosomal protein L17	0.846	1	0.833	1
K02881	This is one of the proteins that binds and probably mediates the attachment of the 5S RNA into the large ribosomal subunit, where it forms part of the central protuberance	0.769	0.923	1	0.5
K02884	This protein is located at the 30S-50S ribosomal subunit interface and may play a role in the structure and function of the aminoacyl-tRNA binding site	0.923	0.846	1	1
K02886	One of the primary rRNA binding proteins. Required for association of the 30S and 50S subunits to form the 70S ribosome, for tRNA binding and peptide bond formation. It has been suggested to have peptidyltransferase activity	0.923	0.923	0.833	0.5
K02887	Binds directly to 23S ribosomal RNA and is necessary for the in vitro assembly process of the 50S ribosomal subunit. It is not involved in the protein synthesizing functions of that subunit	0.923	0.923	0.833	0.5
K02890	The globular domain of the protein is located near the polypeptide exit tunnel on the outside of the subunit, while an extended beta-hairpin is found that lines the wall of the exit tunnel in the center of the 70S ribosome	0.923	0.923	0.833	1
K02892	One of the early assembly proteins it binds 23S rRNA. One of the proteins that surrounds the polypeptide exit tunnel on the outside of the ribosome. Forms the main docking site for trigger factor binding to the ribosome	0.923	0.923	0.833	1
K02895	One of the proteins that surrounds the polypeptide exit tunnel on the outside of the subunit	0.846	0.923	1	0.5
K02902	Belongs to the bacterial ribosomal protein bL28 family	0.769	0.923	1	1
K02904	Belongs to the universal ribosomal protein uL29 family	0.923	0.923	1	0.5
K02906	One of the primary rRNA binding proteins, it binds directly near the 3'-end of the 23S rRNA, where it nucleates assembly of the 50S subunit	0.923	0.923	0.833	1
K02909	Binds the 23S rRNA	1	0.846	1	0.5
K02926	Forms part of the polypeptide exit tunnel	0.923	0.923	0.833	1
K02931	This is 1 of the proteins that binds and probably mediates the attachment of the 5S RNA into the large ribosomal subunit, where it forms part of the central protuberance. In the 70S ribosome it contacts protein S13 of the 30S subunit (bridge B1b), connecting the 2 subunits	0.846	0.923	1	0.5
K02933	This protein binds to the 23S rRNA, and is important in its secondary structure. It is located near the subunit interface in the base of the L7 L12 stalk, and near the tRNA binding site of the peptidyltransferase center	0.846	0.923	1	0.5
K02935	Forms part of the ribosomal stalk which helps the ribosome interact with GTP-bound translation factors. Is thus essential for accurate translation	0.692	0.923	1	1
K02939	Binds to the 23S rRNA	0.923	1	1	1
K02945	Catalyzes the conversion of 1-hydroxy-2-methyl-2-(E)- butenyl 4-diphosphate (HMBPP) into a mixture of isopentenyl diphosphate (IPP) and dimethylallyl diphosphate (DMAPP). Acts in the terminal step of the DOXP MEP pathway for isoprenoid precursor biosynthesis	0.846	0.923	0.833	1
K02946	Involved in the binding of tRNA to the ribosomes	0.923	1	0.833	1
K02948	Located on the platform of the 30S subunit, it bridges several disparate RNA helices of the 16S rRNA. Forms part of the Shine-Dalgarno cleft in the 70S ribosome	0.846	1	1	1
K02950	Interacts with and stabilizes bases of the 16S rRNA that are involved in tRNA selection in the A site and with the mRNA backbone. Located at the interface of the 30S and 50S subunits, it traverses the body of the 30S subunit contacting proteins on the other side and probably holding the rRNA structure together. The combined cluster of proteins S8, S12 and S17 appears to hold together the shoulder…	0.846	0.923	0.833	1
K02952	Located at the top of the head of the 30S subunit, it contacts several helices of the 16S rRNA. In the 70S ribosome it contacts the 23S rRNA (bridge B1a) and protein L5 of the 50S subunit (bridge B1b), connecting the 2 subunits	0.769	1	1	1
K02956	Forms an intersubunit bridge (bridge B4) with the 23S rRNA of the 50S subunit in the ribosome	0.769	0.846	1	1
K02959	Belongs to the bacterial ribosomal protein bS16 family	0.846	0.923	0.833	1
K02961	One of the primary rRNA binding proteins, it binds specifically to the 5'-end of 16S ribosomal RNA	0.923	0.923	1	0.5
K02963	Binds as a heterodimer with protein S6 to the central domain of the 16S rRNA, where it helps stabilize the platform of the 30S subunit	1	1	0.833	1
K02965	Protein S19 forms a complex with S13 that binds strongly to the 16S ribosomal RNA	0.923	0.923	0.833	0.5
K02967	Belongs to the universal ribosomal protein uS2 family	0.846	0.846	1	1
K02968	Binds directly to 16S ribosomal RNA	0.692	0.923	0.833	0.5
K02982	Binds the lower part of the 30S subunit head. Binds mRNA in the 70S ribosome, positioning it for translation	0.923	0.923	1	0.5
K02986	One of the primary rRNA binding proteins, it binds directly to 16S rRNA where it nucleates assembly of the body of the 30S subunit	0.846	1	0.833	0.5
K02988	Located at the back of the 30S subunit body where it stabilizes the conformation of the head with respect to the body	0.769	0.923	1	0.5
K02990	Binds together with S18 to 16S ribosomal RNA	1	0.923	1	1
K02992	One of the primary rRNA binding proteins, it binds directly to 16S rRNA where it nucleates assembly of the head domain of the 30S subunit. Is located at the subunit interface close to the decoding center, probably blocks exit of the E-site tRNA	0.923	0.923	0.833	1
K02994	One of the primary rRNA binding proteins, it binds directly to 16S rRNA central domain where it helps coordinate assembly of the platform of the 30S subunit	0.846	0.923	1	0.5
K02996	Belongs to the universal ribosomal protein uS9 family	0.846	1	1	1
K03040	DNA-dependent RNA polymerase catalyzes the transcription of DNA into RNA using the four ribonucleoside triphosphates as substrates	0.769	1	0.833	1
K03043	DNA-dependent RNA polymerase catalyzes the transcription of DNA into RNA using the four ribonucleoside triphosphates as substrates	0.769	0.846	0.667	1
K03046	DNA-dependent RNA polymerase catalyzes the transcription of DNA into RNA using the four ribonucleoside triphosphates as substrates	0.846	0.846	0.833	1
K03070	Part of the Sec protein translocase complex. Interacts with the SecYEG preprotein conducting channel. Has a central role in coupling the hydrolysis of ATP to the transfer of proteins into and across the cell membrane, serving as an ATP-driven molecular motor driving the stepwise translocation of polypeptide chains across the membrane	0.923	0.846	0.833	0.5
K03073	Essential subunit of the Sec protein translocation channel SecYEG. Clamps together the 2 halves of SecY. May contact the channel plug during translocation	0.615	1	0.833	1
K03074	Part of the Sec protein translocase complex. Interacts with the SecYEG preprotein conducting channel. SecDF uses the proton motive force (PMF) to complete protein translocation after the ATP-dependent function of SecA	0.769	1	1	0.5
K03076	The central subunit of the protein translocation channel SecYEG. Consists of two halves formed by TMs 1-5 and 6-10. These two domains form a lateral gate at the front which open onto the bilayer between TMs 2 and 7, and are clamped together by SecE at the back. The channel is closed by both a pore ring composed of hydrophobic SecY resides and a short helix (helix 2A) on the extracellular side of …	0.923	1	1	1
K03086	Sigma factors are initiation factors that promote the attachment of RNA polymerase to specific initiation sites and are then released. This sigma factor is the primary sigma factor during exponential growth	0.769	1	1	0.5
K03088	Belongs to the sigma-70 factor family. ECF subfamily	0.923	0.923	1	1
K03090	Sigma factors are initiation factors that promote the attachment of RNA polymerase to specific initiation sites and are then released	0.769	0.769	1	0.5
K03091	Sigma factors are initiation factors that promote the attachment of RNA polymerase to specific initiation sites and are then released	1	1	1	1
K03093	Sigma factors are initiation factors that promote the attachment of RNA polymerase to specific initiation sites and are then released	0.769	0.692	1	0.5
K03100	Belongs to the peptidase S26 family	0.923	0.923	1	0.5
K03101	This protein specifically catalyzes the removal of signal peptides from prolipoproteins	0.923	0.923	0.833	0.5
K03106	Involved in targeting and insertion of nascent membrane proteins into the cytoplasmic membrane. Binds to the hydrophobic signal sequence of the ribosome-nascent chain (RNC) as it emerges from the ribosomes. The SRP-RNC complex is then targeted to the cytoplasmic membrane where it interacts with the SRP receptor FtsY	0.846	1	0.833	1
K03111	Plays an important role in DNA replication, recombination and repair. Binds to ssDNA and to an array of partner proteins to recruit them to their sites of action during DNA metabolism	0.846	0.923	0.833	1
K03116	protein secretion	0.846	1	0.5	0.5
K03118	Part of the twin-arginine translocation (Tat) system that transports large folded proteins containing a characteristic twin-arginine motif in their signal peptide across membranes	0.615	0.923	0.667	0.5
K03146	Involved in the biosynthesis of the thiazole moiety of thiamine. Catalyzes the conversion of NAD and glycine to adenosine diphosphate 5-(2-hydroxyethyl)-4-methylthiazole-2-carboxylate (ADT), an adenylated thiazole intermediate, using free sulfide as a source of sulfur	1	0.846	0.833	0.5
K03147	Catalyzes the synthesis of the hydroxymethylpyrimidine phosphate (HMP-P) moiety of thiamine from aminoimidazole ribotide (AIR) in a radical S-adenosyl-L-methionine (SAM)-dependent reaction	1	0.923	0.833	0.5
K03168	Releases the supercoiling and torsional tension of DNA, which is introduced during the DNA replication and transcription, by transiently cleaving and rejoining one strand of the DNA duplex. Introduces a single-strand break via transesterification at a target site in duplex DNA. The scissile phosphodiester is attacked by the catalytic tyrosine of the enzyme, resulting in the formation of a DNA-(5'…	0.846	1	0.833	1
K03169	Releases the supercoiling and torsional tension of DNA, which is introduced during the DNA replication and transcription, by transiently cleaving and rejoining one strand of the DNA duplex. Introduces a single-strand break via transesterification at a target site in duplex DNA. The scissile phosphodiester is attacked by the catalytic tyrosine of the enzyme, resulting in the formation of a DNA-(5'…	0.615	0.923	0.833	0.5
K03177	Responsible for synthesis of pseudouridine from uracil- 55 in the psi GC loop of transfer RNAs	0.923	0.846	0.833	0.5
K03179	PFAM UbiA prenyltransferase	0.769	0.692	1	0.5
K03182	Belongs to the UbiD family	0.769	0.692	1	1
K03183	Methyltransferase required for the conversion of demethylmenaquinol (DMKH2) to menaquinol (MKH2)	0.846	0.923	1	0.5
K03217	Membrane protein insertase, YidC Oxa1 family	0.769	0.769	0.667	0.5
K03218	Belongs to the class IV-like SAM-binding methyltransferase superfamily. RNA methyltransferase TrmH family	1	1	1	0.5
K03284	Mg2 transporter protein	0.923	0.846	1	0.5
K03320	Ammonium Transporter Family	0.846	0.923	1	0.5
K03408	PFAM CheW domain protein	0.692	0.538	1	0.5
K03413	response regulator receiver	0.692	0.615	1	0.5
K03424	TIGRFAM hydrolase, TatD family	0.846	1	0.833	0.5
K03431	Catalyzes the conversion of glucosamine-6-phosphate to glucosamine-1-phosphate	0.692	0.615	1	0.5
K03437	RNA 2'-O ribose methyltransferase substrate binding	0.846	1	1	0.5
K03466	DNA segregation ATPase FtsK SpoIIIE	1	0.846	0.833	0.5
K03469	Endonuclease that specifically degrades the RNA of RNA- DNA hybrids	1	0.846	1	0.5
K03470	Endonuclease that specifically degrades the RNA of RNA- DNA hybrids	0.923	0.923	1	0.5
K03495	NAD-binding protein involved in the addition of a carboxymethylaminomethyl (cmnm) group at the wobble position (U34) of certain tRNAs, forming tRNA-cmnm(5)s(2)U34	0.923	0.769	1	0.5
K03498	TIGRFAM Potassium uptake protein TrkH	0.923	0.769	1	0.5
K03499	PFAM TrkA-N domain	0.923	1	1	0.5
K03501	Specifically methylates the N7 position of a guanine in 16S rRNA	0.923	0.615	1	0.5
K03517	Catalyzes the condensation of iminoaspartate with dihydroxyacetone phosphate to form quinolinate	0.692	1	0.833	1
K03521	Electron transfer flavoprotein	1	0.923	0.833	1
K03522	electron transfer flavoprotein, alpha subunit	1	0.923	1	1
K03524	Acts both as a biotin-- acetyl-CoA-carboxylase ligase and a repressor	0.923	0.923	0.833	1
K03525	Catalyzes the phosphorylation of pantothenate (Pan), the first step in CoA biosynthesis	0.923	0.923	1	1
K03526	Converts 2C-methyl-D-erythritol 2,4-cyclodiphosphate (ME-2,4cPP) into 1-hydroxy-2-methyl-2-(E)-butenyl 4-diphosphate	0.692	0.846	1	1
K03527	Catalyzes the conversion of 1-hydroxy-2-methyl-2-(E)- butenyl 4-diphosphate (HMBPP) into a mixture of isopentenyl diphosphate (IPP) and dimethylallyl diphosphate (DMAPP). Acts in the terminal step of the DOXP MEP pathway for isoprenoid precursor biosynthesis	0.846	0.923	0.833	1
K03530	regulation of translation	0.923	0.923	0.667	1
K03536	RNaseP catalyzes the removal of the 5'-leader sequence from pre-tRNA to produce the mature 5'-terminus. It can also cleave other RNA substrates such as 4.5S RNA. The protein component plays an auxiliary but essential role in vivo by binding to the 5'-leader sequence and broadening the substrate specificity of the ribozyme	0.846	0.769	0.667	0.5
K03543	PFAM secretion protein HlyD family protein	0.538	0.923	0.5	0.5
K03544	ATP-dependent specificity component of the Clp protease. It directs the protease to specific substrates. Can perform chaperone functions in the absence of ClpP	0.692	0.846	0.833	0.5
K03545	Involved in protein export. Acts as a chaperone by maintaining the newly synthesized protein in an open conformation. Functions as a peptidyl-prolyl cis-trans isomerase	0.769	0.846	0.833	0.5
K03550	The RuvA-RuvB complex in the presence of ATP renatures cruciform structure in supercoiled DNA with palindromic sequence, indicating that it may promote strand exchange reactions in homologous recombination. RuvAB is a helicase that mediates the Holliday junction migration by localized denaturation and reannealing. RuvA stimulates, in the presence of DNA, the weak ATPase activity of RuvB	0.923	0.846	1	1
K03551	The RuvA-RuvB complex in the presence of ATP renatures cruciform structure in supercoiled DNA with palindromic sequence, indicating that it may promote strand exchange reactions in homologous recombination. RuvAB is a helicase that mediates the Holliday junction migration by localized denaturation and reannealing	0.923	0.923	0.833	1
K03553	Can catalyze the hydrolysis of ATP in the presence of single-stranded DNA, the ATP-dependent uptake of single-stranded DNA by duplex DNA, and the ATP-dependent hybridization of homologous single-stranded DNAs. It interacts with LexA causing its activation and leading to its autocatalytic cleavage	0.923	0.846	1	0.5
K03568	PFAM peptidase U62 modulator of DNA gyrase	0.923	1	0.833	0.5
K03569	TIGRFAM Cell shape determining protein MreB Mrl	1	0.923	1	0.5
K03570	Involved in formation and maintenance of cell shape	0.923	0.538	1	0.5
K03571	shape-determining protein MreD	0.846	0.538	1	0.5
K03581	DNA-dependent ATPase and ATP-dependent 5'-3' DNA helicase. Has no activity on blunt DNA or DNA with 3'-overhangs, requires at least 10 bases of 5'-ssDNA for helicase activity	0.846	0.923	1	0.5
K03584	Involved in DNA repair and RecF pathway recombination	0.692	0.923	1	1
K03587	Cell division protein FtsI penicillin-binding protein	0.923	0.846	1	0.5
K03588	Belongs to the SEDS family	1	0.846	1	0.5
K03592	metallopeptidase activity	0.846	1	0.833	1
K03596	Required for accurate and efficient protein synthesis under certain stress conditions. May act as a fidelity factor of the translation reaction, by catalyzing a one-codon backward translocation of tRNAs on improperly translocated ribosomes. Back- translocation proceeds from a post-translocation (POST) complex to a pre-translocation (PRE) complex, thus giving elongation factor G a second chance to…	0.846	0.846	0.833	0.5
K03605	hydrogenase maturation protease	0.769	0.923	0.667	0.5
K03610	Cell division inhibitor that blocks the formation of polar Z ring septums. Rapidly oscillates between the poles of the cell to destabilize FtsZ filaments that have formed before they mature into polar Z rings. Prevents FtsZ polymerization	0.923	0.769	1	1
K03621	Catalyzes the reversible formation of acyl-phosphate (acyl-PO(4)) from acyl- acyl-carrier-protein (acyl-ACP). This enzyme utilizes acyl-ACP as fatty acyl donor, but not acyl-CoA	0.538	1	1	0.5
K03624	Necessary for efficient RNA polymerase transcription elongation past template-encoded arresting sites. The arresting sites in DNA have the property of trapping a certain fraction of elongating RNA polymerases that pass through, resulting in locked ternary complexes. Cleavage of the nascent transcript by cleavage factors such as GreA or GreB allows the resumption of elongation from the new 3'termi…	0.538	0.923	1	1
K03625	Involved in transcription antitermination. Required for transcription of ribosomal RNA (rRNA) genes. Binds specifically to the boxA antiterminator sequence of the ribosomal RNA (rrn) operons	0.923	1	1	0.5
K03628	Facilitates transcription termination by a mechanism that involves Rho binding to the nascent RNA, activation of Rho's RNA-dependent ATPase activity, and release of the mRNA from the DNA template	1	1	1	0.5
K03630	Belongs to the UPF0758 family	0.923	0.846	1	1
K03637	Catalyzes the conversion of (8S)-3',8-cyclo-7,8- dihydroguanosine 5'-triphosphate to cyclic pyranopterin monophosphate (cPMP)	0.769	0.923	0.833	0.5
K03639	Catalyzes the cyclization of GTP to (8S)-3',8-cyclo-7,8- dihydroguanosine 5'-triphosphate	0.846	0.923	0.5	0.5
K03650	Exhibits a very high intrinsic GTPase hydrolysis rate. Involved in the addition of a carboxymethylaminomethyl (cmnm) group at the wobble position (U34) of certain tRNAs, forming tRNA- cmnm(5)s(2)U34	0.923	0.769	0.833	0.5
K03652	Belongs to the DNA glycosylase MPG family	0.846	0.769	0.833	1
K03655	Putative DNA-binding domain	0.538	0.923	1	1
K03664	Required for rescue of stalled ribosomes mediated by trans-translation. Binds to transfer-messenger RNA (tmRNA), required for stable association of tmRNA with ribosomes. tmRNA and SmpB together mimic tRNA shape, replacing the anticodon stem-loop with SmpB. tmRNA is encoded by the ssrA gene	0.923	0.769	1	0.5
K03666	RNA chaperone that binds small regulatory RNA (sRNAs) and mRNAs to facilitate mRNA translational regulation in response to envelope stress, environmental stress and changes in metabolite concentrations. Also binds with high specificity to tRNAs	0.846	1	1	0.5
K03667	this subunit has chaperone activity. The binding of ATP and its subsequent hydrolysis by HslU are essential for unfolding of protein substrates subsequently hydrolyzed by HslV. HslU recognizes the N-terminal part of its protein substrates and unfolds these before they are guided to HslV for hydrolysis	0.923	1	1	0.5
K03671	Belongs to the thioredoxin family	1	0.923	1	0.5
K03685	Digests double-stranded RNA. Involved in the processing of primary rRNA transcript to yield the immediate precursors to the large and small rRNAs (23S and 16S). Processes some mRNAs, and tRNAs when they are encoded in the rRNA operon. Processes pre- crRNA and tracrRNA of type II CRISPR loci if present in the organism	0.769	1	0.833	0.5
K03686	ATP binding to DnaK triggers the release of the substrate protein, thus completing the reaction cycle. Several rounds of ATP-dependent interactions between DnaJ, DnaK and GrpE are required for fully efficient folding. Also involved, together with DnaK and GrpE, in the DNA replication of plasmids through activation of initiation proteins	0.846	1	0.833	0.5
K03687	Participates actively in the response to hyperosmotic and heat shock by preventing the aggregation of stress-denatured proteins, in association with DnaK and GrpE. It is the nucleotide exchange factor for DnaK and may function as a thermosensor. Unfolded proteins bind initially to DnaJ	0.769	1	0.833	1
K03688	pfam abc1	0.692	0.923	0.667	1
K03695	Part of a stress-induced multi-chaperone system, it is involved in the recovery of the cell from heat-induced damage, in cooperation with DnaK, DnaJ and GrpE	0.769	0.923	0.667	0.5
K03696	Belongs to the ClpA ClpB family	0.923	0.923	1	1
K03701	The UvrABC repair system catalyzes the recognition and processing of DNA lesions. UvrA is an ATPase and a DNA-binding protein. A damage recognition complex composed of 2 UvrA and 2 UvrB subunits scans DNA for abnormalities. When the presence of a lesion has been verified by UvrB, the UvrA molecules dissociate	0.769	1	1	0.5
K03702	damaged site, the DNA wraps around one UvrB monomer. DNA wrap is dependent on ATP binding by UvrB and probably causes local melting of the DNA helix, facilitating insertion of UvrB beta-hairpin between the DNA strands. Then UvrB probes one DNA strand for the presence of a lesion. If a lesion is found the UvrA subunits dissociate and the UvrB-DNA preincision complex is formed. This complex is subs…	0.769	0.846	0.833	0.5
K03703	The UvrABC repair system catalyzes the recognition and processing of DNA lesions. UvrC both incises the 5' and 3' sides of the lesion. The N-terminal half is responsible for the 3' incision and the C-terminal half is responsible for the 5' incision	0.692	1	1	0.5
K03704	Cold-shock protein	0.692	0.846	1	0.5
K03705	Negative regulator of class I heat shock genes (grpE- dnaK-dnaJ and groELS operons). Prevents heat-shock induction of these operons	0.769	1	1	1
K03706	DNA-binding protein that represses the expression of many genes that are induced as cells make the transition from rapid exponential growth to stationary phase. It is a GTP-binding protein that senses the intracellular GTP concentration as an indicator of nutritional limitations. At low GTP concentration it no longer binds GTP and stop to act as a transcriptional repressor	0.923	1	1	0.5
K03708	PFAM Firmicute transcriptional repressor of class III stress genes	0.923	0.846	0.833	0.5
K03723	Couples transcription and DNA repair by recognizing RNA polymerase (RNAP) stalled at DNA lesions. Mediates ATP-dependent release of RNAP and its truncated transcript from the DNA, and recruitment of nucleotide excision repair machinery to the damaged site	0.692	0.923	0.833	1
K03733	Belongs to the 'phage' integrase family. XerC subfamily	0.846	1	1	1
K03741	Belongs to the low molecular weight phosphotyrosine protein phosphatase family	0.538	0.615	0.667	0.5
K03742	Belongs to the CinA family	0.923	0.923	1	1
K03743	Belongs to the CinA family	0.923	0.923	1	1
K03750	TIGRFAM molybdenum cofactor synthesis	0.769	0.846	1	1
K03753	Molybdopterin-guanine dinucleotide biosynthesis	0.923	0.846	0.833	0.5
K03786	Catalyzes a trans-dehydration via an enolate intermediate	0.538	1	0.667	1
K03787	Nucleotidase that shows phosphatase activity on nucleoside 5'-monophosphates	0.846	0.769	0.833	0.5
K03789	This enzyme acetylates the N-terminal alanine of ribosomal protein S18	0.923	0.923	0.833	0.5
K03797	Belongs to the peptidase S41A family	0.846	0.923	1	0.5
K03798	Acts as a processive, ATP-dependent zinc metallopeptidase for both cytoplasmic and membrane proteins. Plays a role in the quality control of integral membrane proteins	0.846	0.846	0.667	0.5
K03799	Belongs to the peptidase M48B family	0.769	0.923	0.833	1
K03833	Elongation factor Tu domain 2	0.923	0.923	1	0.5
K03856	PFAM DAHP synthetase I	0.846	0.923	0.833	1
K03977	GTPase that plays an essential role in the late steps of ribosome biogenesis	0.846	1	1	0.5
K03979	An essential GTPase which binds GTP, GDP and possibly (p)ppGpp with moderate affinity, with high nucleotide exchange rates and a fairly low GTP hydrolysis rate. Plays a role in control of the cell cycle, stress response, ribosome biogenesis and in those bacteria that undergo differentiation, in morphogenesis control	0.923	0.846	1	0.5
K04042	Catalyzes the last two sequential reactions in the de novo biosynthetic pathway for UDP-N-acetylglucosamine (UDP- GlcNAc). The C-terminal domain catalyzes the transfer of acetyl group from acetyl coenzyme A to glucosamine-1-phosphate (GlcN-1-P) to produce N-acetylglucosamine-1-phosphate (GlcNAc-1-P), which is converted into UDP-GlcNAc by the transfer of uridine 5- monophosphate (from uridine 5-tr…	0.769	0.923	1	1
K04043	Heat shock 70 kDa protein	1	1	0.833	1
K04066	Involved in the restart of stalled replication forks. Recognizes and binds the arrested nascent DNA chain at stalled replication forks. It can open the DNA duplex, via its helicase activity, and promote assembly of the primosome and loading of the major replicative helicase DnaB onto DNA	0.846	1	0.833	1
K04069	PFAM Radical SAM	1	1	1	1
K04075	Ligates lysine onto the cytidine present at position 34 of the AUA codon-specific tRNA(Ile) that contains the anticodon CAU, in an ATP-dependent manner. Cytidine is converted to lysidine, thus changing the amino acid specificity of the tRNA from methionine to isoleucine	0.923	1	0.833	0.5
K04076	Belongs to the peptidase S16 family	1	1	1	1
K04077	Prevents misfolding and promotes the refolding and proper assembly of unfolded polypeptides generated under stress conditions	0.846	0.769	0.833	1
K04078	Binds to Cpn60 in the presence of Mg-ATP and suppresses the ATPase activity of the latter	0.846	0.769	1	0.5
K04085	Belongs to the sulfur carrier protein TusA family	0.846	0.923	0.667	1
K04096	DNA protecting protein DprA	0.769	0.923	1	0.5
K04485	DNA-dependent ATPase involved in processing of recombination intermediates, plays a role in repairing DNA breaks. Stimulates the branch migration of RecA-mediated strand transfer reactions, allowing the 3' invading strand to extend heteroduplex DNA faster. Binds ssDNA in the presence of ADP but not other nucleotides, has ATPase activity that is stimulated by ssDNA and various branched DNA structu…	1	0.923	0.833	1
K04486	histidinol phosphate phosphatase	1	1	1	0.5
K04487	Master enzyme that delivers sulfur to a number of partners involved in Fe-S cluster assembly, tRNA modification or cofactor biosynthesis. Catalyzes the removal of elemental sulfur atoms from cysteine to produce alanine. Functions as a sulfur delivery protein for Fe-S cluster synthesis onto IscU, an Fe-S scaffold assembly protein, as well as other S acceptor proteins	1	0.923	1	0.5
K04517	PFAM Prephenate dehydrogenase	0.846	0.923	0.833	0.5
K04518	PFAM Prephenate dehydratase	0.923	1	0.833	1
K04562	Belongs to the ParA family	0.615	0.615	1	0.5
K04567	Belongs to the class-II aminoacyl-tRNA synthetase family	0.615	0.846	1	1
K04651	nickel cation binding	0.769	0.923	0.667	0.5
K04653	HupF/HypC family	0.923	0.846	0.667	1
K04654	Hydrogenase expression formation protein hypD	0.846	0.846	0.833	1
K04655	hydrogenase expression formation protein HypE	0.846	0.846	0.833	1
K04656	Belongs to the carbamoyltransferase HypF family	0.846	0.846	0.667	1
K04751	Belongs to the P(II) protein family	0.923	0.923	1	0.5
K04752	Belongs to the P(II) protein family	0.846	0.923	1	0.5
K04758	Fe2 transport system protein A	0.923	0.846	1	1
K04759	Ferrous iron transport protein B	1	0.846	1	1
K04763	Tyrosine recombinase XerD	0.923	1	1	1
K04766	Acetyltransferase (GNAT) family	0.846	0.769	1	0.5
K04769	stage V sporulation protein T	0.692	0.923	0.667	1
K04771	PDZ domain (Also known as DHR or GLGF)	0.923	0.923	0.833	1
K04773	signal peptide peptidase SppA, 36K type	0.923	0.923	1	0.5
K05366	TIGRFAM penicillin-binding protein, 1A	1	0.923	0.833	1
K05515	Penicillin-binding protein, dimerisation domain	0.923	0.846	1	1
K05516	ATP binding to DnaK triggers the release of the substrate protein, thus completing the reaction cycle. Several rounds of ATP-dependent interactions between DnaJ, DnaK and GrpE are required for fully efficient folding. Also involved, together with DnaK and GrpE, in the DNA replication of plasmids through activation of initiation proteins	0.615	0.923	0.5	1
K05589	PFAM Septum formation initiator	0.692	1	0.833	0.5
K05808	Required for dimerization of active 70S ribosomes into 100S ribosomes in stationary phase	0.923	0.846	0.833	0.5
K05919	Desulfoferrodoxin ferrous iron-binding	0.692	1	0.5	0.5
K05939	Acyl-CoA synthetase (AMP-forming) AMP-acid ligase II	0.769	0.923	1	1
K05946	Catalyzes the conversion of GlcNAc-PP-undecaprenol into ManNAc-GlcNAc-PP-undecaprenol, the first committed lipid intermediate in the de novo synthesis of teichoic acid	0.692	0.923	1	0.5
K06001	The beta subunit is responsible for the synthesis of L- tryptophan from indole and L-serine	0.769	0.923	1	0.5
K06012	Initiates the rapid degradation of small, acid-soluble proteins during spore germination	0.923	0.923	1	0.5
K06019	TIGRFAM HAD-superfamily hydrolase, subfamily IA, variant 3	0.615	1	1	1
K06027	Belongs to the AAA ATPase family	0.923	0.846	0.833	0.5
K06153	Catalyzes the dephosphorylation of undecaprenyl diphosphate (UPP). Confers resistance to bacitracin	0.615	0.692	0.833	0.5
K06173	Formation of pseudouridine at positions 38, 39 and 40 in the anticodon stem and loop of transfer RNAs	0.846	1	0.833	1
K06180	Responsible for synthesis of pseudouridine from uracil	0.846	1	0.833	0.5
K06215	Catalyzes the formation of pyridoxal 5'-phosphate from ribose 5-phosphate (RBP), glyceraldehyde 3-phosphate (G3P) and ammonia. The ammonia is provided by the PdxT subunit. Can also use ribulose 5-phosphate and dihydroxyacetone phosphate as substrates, resulting from enzyme-catalyzed isomerization of RBP and G3P, respectively	0.692	0.846	1	0.5
K06281	Belongs to the NiFe NiFeSe hydrogenase large subunit family	0.923	0.923	0.667	0.5
K06282	TIGRFAM hydrogenase (NiFe) small subunit (hydA)	0.846	1	0.5	0.5
K06284	Transcriptional regulator, AbrB family	1	0.923	1	0.5
K06285	PFAM tryptophan RNA-binding attenuator protein	0.923	1	1	0.5
K06295	PFAM Bacillus Clostridium GerA spore germination protein	0.923	0.923	1	1
K06296	spore germination protein	0.923	0.846	1	0.5
K06297	PFAM spore germination B3 GerAC	0.846	0.846	1	1
K06313	germination protein YpeB	0.846	0.923	0.833	1
K06333	CotJB protein	0.692	0.769	0.833	0.5
K06334	PFAM Manganese containing catalase	0.846	0.692	0.833	0.5
K06346	PFAM Single-stranded nucleic acid binding R3H	0.769	0.769	0.833	0.5
K06373	PFAM Nucleoside recognition	0.769	0.769	1	0.5
K06374	PFAM Nucleoside recognition	0.769	0.846	0.667	1
K06379	Binds to sigma F and blocks its ability to form an RNA polymerase holoenzyme (E-sigma F). Phosphorylates SpoIIAA on a serine residue. This phosphorylation may enable SpoIIAA to act as an anti-anti-sigma factor that counteracts SpoIIAB and thus releases sigma F from inhibition	0.769	0.769	1	0.5
K06381	Stage II sporulation protein D	1	1	1	1
K06382	stage II sporulation protein E	0.923	1	0.833	0.5
K06385	PFAM Stage II sporulation P family protein	1	1	1	1
K06387	PFAM Sporulation stage II protein R	0.769	0.692	0.833	0.5
K06390	stage III sporulation protein AA	0.769	1	1	1
K06391	TIGRFAM stage III sporulation protein AB	0.692	1	1	1
K06392	TIGRFAM stage III sporulation protein AC	0.769	0.923	1	1
K06393	Stage III sporulation protein AD	0.692	1	1	0.5
K06394	PFAM Sporulation stage III, protein AE	0.692	1	0.833	0.5
K06395	Stage III sporulation protein	0.538	0.923	0.833	0.5
K06396	Stage III sporulation protein AG	0.615	1	1	0.5
K06397	SpoIIIAH-like protein	0.692	0.846	1	0.5
K06398	ATPase. Has a role at an early stage in the morphogenesis of the spore coat	0.769	1	1	0.5
K06399	Stage IV sporulation protein	0.846	0.923	1	1
K06405	stage V sporulation protein AC	0.769	0.769	1	0.5
K06406	Stage V sporulation protein AD (SpoVAD)	0.923	0.846	1	0.5
K06407	TIGRFAM stage V sporulation protein AE	0.923	0.846	1	0.5
K06410	PFAM D-isomer specific 2-hydroxyacid dehydrogenase	0.923	0.846	1	0.5
K06411	TIGRFAM dipicolinic acid synthetase, B subunit	0.923	0.846	1	1
K06415	PFAM SpoVR like protein	1	0.692	1	0.5
K06416	PFAM Stage V sporulation protein S	0.846	0.846	1	0.5
K06421	PFAM small acid-soluble spore protein alpha	0.769	0.923	1	0.5
K06436	PFAM peptidase U57, YabG	0.846	1	1	0.5
K06438	stage IV sporulation	0.769	0.538	0.833	0.5
K06871	PFAM Radical SAM	1	0.923	0.833	1
K06881	DHHA1 domain	0.923	0.846	1	0.5
K06889	Alpha/beta hydrolase family	0.923	0.923	1	1
K06897	Metal-dependent hydrolase, beta-lactamase superfamily II	0.692	0.538	1	0.5
K06898	(AIR) carboxylase	0.846	1	1	0.5
K06920	Catalyzes the ATP-dependent conversion of 7-carboxy-7- deazaguanine (CDG) to 7-cyano-7-deazaguanine (preQ(0))	0.769	0.923	0.833	0.5
K06925	PFAM Uncharacterised P-loop hydrolase UPF0079	0.769	0.923	0.667	0.5
K06942	ATPase that binds to both the 70S ribosome and the 50S ribosomal subunit in a nucleotide-independent manner	0.923	0.846	1	0.5
K06949	One of several proteins that assist in the late maturation steps of the functional core of the 30S ribosomal subunit. Helps release RbfA from mature subunits. May play a role in the assembly of ribosomal proteins into the subunit. Circularly permuted GTPase that catalyzes slow GTP hydrolysis, GTPase activity is stimulated by the 30S ribosomal subunit	0.615	0.923	1	0.5
K06960	Belongs to the UPF0109 family	0.846	0.923	0.833	1
K06962	YacP-like NYN domain	1	1	1	0.5
K06966	TIGRFAM TIGR00725 family protein	0.615	0.846	1	0.5
K06967	SAM-dependent methyltransferase	0.769	0.846	0.833	0.5
K07001	PFAM Patatin	0.769	1	0.833	0.5
K07006	PFAM pyridoxamine 5'-phosphate oxidase-related, FMN-binding	0.846	0.846	1	0.5
K07009	PFAM CobB CobQ-like glutamine amidotransferase	0.692	1	1	0.5
K07015	HAD superfamily (Subfamily IIIA) phosphatase, TIGR01668	0.769	1	0.833	0.5
K07045	Amidohydrolase	0.846	0.769	1	1
K07056	Catalyzes the 2'-O-methylation of the ribose of cytidine 1402 (C1402) in 16S rRNA	0.923	0.923	1	0.5
K07067	Has also diadenylate cyclase activity, catalyzing the condensation of 2 ATP molecules into cyclic di-AMP (c-di-AMP). c- di-AMP acts as a signaling molecule that couples DNA integrity with progression of sporulation. The rise in c-di-AMP level generated by DisA while scanning the chromosome, operates as a positive signal that advances sporulation	0.923	0.923	0.833	0.5
K07068	nucleic-acid-binding protein containing a Zn-ribbon	0.846	0.846	1	1
K07082	Functions as a peptidoglycan terminase that cleaves nascent peptidoglycan strands endolytically to terminate their elongation	0.769	0.923	0.667	1
K07090	Sulfite exporter TauE/SafE	0.846	1	1	1
K07099	PFAM Metallophosphoesterase	0.615	1	0.833	1
K07112	Sulphur transport	0.538	0.923	0.5	0.5
K07137	PFAM FAD dependent oxidoreductase	1	0.923	1	0.5
K07159	PAC2 family	0.846	0.769	1	0.5
K07171	Toxic component of a toxin-antitoxin (TA) module	0.846	0.769	0.833	1
K07180	PFAM PrkA AAA domain	1	1	1	0.5
K07219	TIGRFAM molybdenum cofactor synthesis	0.538	0.692	0.833	1
K07258	Belongs to the peptidase S11 family	1	0.923	1	1
K07403	Membrane-bound serine protease (ClpP class)	0.538	0.846	1	0.5
K07447	Could be a nuclease involved in processing of the 5'-end of pre-16S rRNA	0.846	0.923	1	1
K07456	Endonuclease that is involved in the suppression of homologous recombination and may therefore have a key role in the control of bacterial genetic diversity	0.692	0.846	0.833	1
K07462	TIGRFAM single-stranded-DNA-specific exonuclease RecJ	0.538	0.846	0.833	0.5
K07478	AAA ATPase	0.769	0.923	1	1
K07497	PFAM Integrase catalytic region	1	0.769	0.667	1
K07566	Required for the formation of a threonylcarbamoyl group on adenosine at position 37 (t(6)A37) in tRNAs that read codons beginning with adenine	0.692	0.923	1	1
K07570	Ribosomal protein S1	0.769	0.923	0.833	0.5
K07571	Ribosomal protein S1	0.769	0.923	0.833	0.5
K07590	PFAM ribosomal protein L7Ae L30e S12e Gadd45	0.846	0.846	0.833	1
K07636	Histidine kinase-, DNA gyrase B-, and HSP90-like ATPase	0.923	0.923	1	1
K07658	PFAM response regulator receiver	0.846	1	1	1
K07668	PFAM response regulator receiver	0.846	1	1	1
K07699	May play the central regulatory role in sporulation. It may be an element of the effector pathway responsible for the activation of sporulation genes in response to nutritional stress. Spo0A may act in concert with spo0H (a sigma factor) to control the expression of some genes that are critical to the sporulation process	0.769	0.923	0.667	1
K07736	transcriptional regulator	0.923	1	0.667	1
K07742	Nucleic-acid-binding protein implicated in transcription termination	0.846	0.846	1	0.5
K07755	Methyltransferase type 11	0.615	0.615	0.667	0.5
K08301	TIGRFAM ribonuclease, Rne Rng family	0.846	0.923	0.833	0.5
K08309	transglycosylase	0.846	0.923	1	1
K08316	Methyltransferase	0.923	0.846	1	0.5
K08384	TIGRFAM stage V sporulation protein D	1	1	1	1
K08591	Catalyzes the transfer of an acyl group from acyl- phosphate (acyl-PO(4)) to glycerol-3-phosphate (G3P) to form lysophosphatidic acid (LPA). This enzyme utilizes acyl-phosphate as fatty acyl donor, but not acyl-CoA or acyl-ACP	0.846	1	0.833	1
K08681	Catalyzes the hydrolysis of glutamine to glutamate and ammonia as part of the biosynthesis of pyridoxal 5'-phosphate. The resulting ammonia molecule is channeled to the active site of PdxS	0.692	0.846	0.833	0.5
K08999	Bifunctional nuclease	0.923	0.923	0.833	0.5
K09065	Reversibly catalyzes the transfer of the carbamoyl group from carbamoyl phosphate (CP) to the N(epsilon) atom of ornithine (ORN) to produce L-citrulline	0.846	0.923	0.833	0.5
K09116	Protein of unknown function DUF89	0.846	0.923	1	1
K09118	PFAM Uncharacterised protein family UPF0182	0.692	1	1	0.5
K09121	Involved in the biosynthesis of a nickel-pincer cofactor ((SCS)Ni(II) pincer complex). Binds Ni(2 ), and functions in nickel delivery to pyridinium-3,5-bisthiocarboxylic acid mononucleotide (P2TMN), to form the mature cofactor. Is thus probably required for the activation of nickel-pincer cofactor- dependent enzymes	0.923	1	1	0.5
K09139	Domain of unknown function (DUF366)	0.846	0.923	0.833	0.5
K09165	Dodecin	0.769	0.769	1	0.5
K09251	Aminotransferase class-III	0.769	1	0.833	1
K09458	Catalyzes the condensation reaction of fatty acid synthesis by the addition to an acyl acceptor of two carbons from malonyl-ACP	0.769	1	1	1
K09694	ABC-2 type transporter	0.846	0.692	0.833	0.5
K09695	AAA domain, putative AbiEii toxin, Type IV TA system	0.923	0.692	0.833	0.5
K09710	Functions as a ribosomal silencing factor. Interacts with ribosomal protein L14 (rplN), blocking formation of intersubunit bridge B8. Prevents association of the 30S and 50S ribosomal subunits and the formation of functional ribosomes, thus repressing translation	0.923	0.846	0.833	0.5
K09747	Binds to DNA and alters its conformation. May be involved in regulation of gene expression, nucleoid organization and DNA protection	0.923	0.769	1	0.5
K09748	Required for maturation of 30S ribosomal subunits	0.923	0.846	0.833	1
K09764	Protein of unknown function (DUF503)	0.769	0.692	1	0.5
K09769	TIGRFAM metallophosphoesterase, MG_246 BB_0505 family	0.923	0.846	0.5	0.5
K09773	Bifunctional serine threonine kinase and phosphorylase involved in the regulation of the pyruvate, phosphate dikinase (PPDK) by catalyzing its phosphorylation dephosphorylation	0.923	1	1	1
K09776	Ribonuclease H-like	0.923	0.923	1	0.5
K09777	Belongs to the UPF0296 family	0.846	0.923	1	1
K09786	Belongs to the UPF0229 family	1	0.846	1	0.5
K09811	Part of the ABC transporter FtsEX involved in asymmetric cellular division facilitating the initiation of sporulation	0.923	1	1	0.5
K09812	TIGRFAM Cell division ATP-binding protein FtsE	0.923	0.846	1	0.5
K09815	Belongs to the bacterial solute-binding protein 9 family	0.846	0.846	1	0.5
K09816	ABC 3 transport family	1	0.769	1	0.5
K09817	ABC transporter	0.923	0.846	1	0.5
K09888	Activator of cell division through the inhibition of FtsZ GTPase activity, therefore promoting FtsZ assembly into bundles of protofilaments necessary for the formation of the division Z ring. It is recruited early at mid-cell but it is not essential for cell division	0.538	0.923	1	1
K09903	Catalyzes the reversible phosphorylation of UMP to UDP	0.846	0.846	1	0.5
K09936	Putative inner membrane exporter, YdcZ	0.923	1	0.833	0.5
K09942	Domain of unknown function (DUF4912)	0.769	0.923	1	1
K09989	PFAM VWA domain containing CoxE-like protein	0.846	1	1	0.5
K10026	Catalyzes the complex heterocyclic radical-mediated conversion of 6-carboxy-5,6,7,8-tetrahydropterin (CPH4) to 7- carboxy-7-deazaguanine (CDG), a step common to the biosynthetic pathways of all 7-deazapurine-containing compounds	0.923	0.846	1	0.5
K10206	Involved in the synthesis of meso-diaminopimelate (m-DAP or DL-DAP), required for both lysine and peptidoglycan biosynthesis. Catalyzes the direct conversion of tetrahydrodipicolinate to LL-diaminopimelate	0.846	0.923	0.833	0.5
K10543	Periplasmic binding protein domain	0.769	0.846	1	0.5
K10563	Involved in base excision repair of DNA damaged by oxidation or by mutagenic agents. Acts as DNA glycosylase that recognizes and removes damaged bases. Has a preference for oxidized purines, such as 7,8-dihydro-8-oxoguanine (8-oxoG). Has AP (apurinic apyrimidinic) lyase activity and introduces nicks in the DNA strand. Cleaves the DNA backbone by beta-delta elimination to generate a single-strand …	0.846	0.923	1	1
K10907	PFAM Aminotransferase class I and II	0.923	1	1	1
K11175	Catalyzes the transfer of a formyl group from 10- formyltetrahydrofolate to 5-phospho-ribosyl-glycinamide (GAR), producing 5-phospho-ribosyl-N-formylglycinamide (FGAR) and tetrahydrofolate	0.692	0.923	1	0.5
K11179	sulfur relay protein, TusE DsrC DsvC family	0.923	0.923	0.833	1
K11358	PFAM Aminotransferase class I and II	0.923	1	1	1
K11749	zinc metalloprotease	0.923	0.846	1	1
K11752	Converts 2,5-diamino-6-(ribosylamino)-4(3h)-pyrimidinone 5'-phosphate into 5-amino-6-(ribosylamino)-2,4(1h,3h)- pyrimidinedione 5'-phosphate	0.923	1	0.833	0.5
K11753	Belongs to the ribF family	0.923	0.846	0.833	1
K11754	Belongs to the folylpolyglutamate synthase family	0.923	0.615	1	1
K11755	belongs to the PRA-CH family	0.846	1	1	0.5
K11991	Catalyzes the deamination of adenosine to inosine at the wobble position 34 of tRNA(Arg2)	0.923	0.615	0.5	0.5
K12132	PFAM Protein kinase domain	1	0.923	1	0.5
K12410	PFAM Silent information regulator protein Sir2	0.846	0.923	1	1
K12506	Involved in the biosynthesis of isopentenyl diphosphate (IPP) and dimethylallyl diphosphate (DMAPP), two major building blocks of isoprenoid compounds. Catalyzes the conversion of 4- diphosphocytidyl-2-C-methyl-D-erythritol 2-phosphate (CDP-ME2P) to 2-C-methyl-D-erythritol 2,4-cyclodiphosphate (ME-CPP) with a corresponding release of cytidine 5-monophosphate (CMP)	1	1	1	1
K13038	Catalyzes two steps in the biosynthesis of coenzyme A. In the first step cysteine is conjugated to 4'-phosphopantothenate to form 4-phosphopantothenoylcysteine, in the latter compound is decarboxylated to form 4'-phosphopantotheine	0.923	1	1	1
K13052	PFAM Septum formation initiator	0.692	1	0.833	0.5
K13057	Glycosyl transferases group 1	1	1	1	0.5
K13252	Reversibly catalyzes the transfer of the carbamoyl group from carbamoyl phosphate (CP) to the N(epsilon) atom of ornithine (ORN) to produce L-citrulline	0.846	0.923	0.833	0.5
K13292	Transfers the N-acyl diglyceride group on what will become the N-terminal cysteine of membrane lipoproteins	0.923	0.923	0.833	1
K13497	Catalyzes the transfer of the phosphoribosyl group of 5- phosphorylribose-1-pyrophosphate (PRPP) to anthranilate to yield N-(5'-phosphoribosyl)-anthranilate (PRA)	0.769	1	0.833	0.5
K13640	helix_turn_helix, mercury resistance	0.769	0.923	0.5	1
K13818	Transfers a GMP moiety from GTP to Mo-molybdopterin (Mo- MPT) cofactor (Moco or molybdenum cofactor) to form Mo- molybdopterin guanine dinucleotide (Mo-MGD) cofactor	1	1	0.833	0.5
K13829	Catalyzes the conversion of 3-deoxy-D-arabino- heptulosonate 7-phosphate (DAHP) to dehydroquinate (DHQ)	0.846	1	0.667	1
K13940	PFAM 7,8-Dihydro-6-hydroxymethylpterin-pyrophosphokinase, HPPK	1	1	1	1
K14170	PFAM Prephenate dehydratase	0.923	0.692	0.833	1
K14441	Catalyzes the methylthiolation of an aspartic acid residue of ribosomal protein S12	0.846	0.769	0.833	0.5
K14540	Required for a late step of 50S ribosomal subunit assembly. Has GTPase activity	0.923	0.846	1	0.5
K14652	Catalyzes the conversion of D-ribulose 5-phosphate to formate and 3,4-dihydroxy-2-butanone 4-phosphate	0.846	0.923	1	0.5
K14742	PFAM Peptidase M22, glycoprotease	0.769	0.923	0.833	0.5
K15023	Pterin binding enzyme	0.769	0.846	0.833	1
K15987	Sodium pump that utilizes the energy of pyrophosphate hydrolysis as the driving force for Na( ) movement across the membrane	0.923	0.846	0.833	0.5
K16055	PFAM Glycosyl transferase, family 20	1	0.923	1	0.5
K16149	Belongs to the glycosyl hydrolase 57 family	0.846	0.923	1	1
K16150	PFAM Glycosyl transferase, group 1	0.692	0.846	0.833	1
K16239	Belongs to the UbiD family	0.769	0.692	1	1
K16785	PFAM ABC transporter related	0.769	0.846	1	1
K16786	PFAM ABC transporter related	0.923	0.846	1	1
K16787	PFAM ABC transporter related	0.769	0.846	1	1
K16881	alpha beta alpha domain I	0.846	0.923	0.833	0.5
K16898	ATP-dependent helicase nuclease subunit A	0.846	0.923	1	0.5
K16899	The heterodimer acts as both an ATP-dependent DNA helicase and an ATP-dependent, dual-direction single-stranded exonuclease. Recognizes the chi site generating a DNA molecule suitable for the initiation of homologous recombination. The AddB nuclease domain is not required for chi fragment generation	0.923	0.923	0.667	0.5
K16927	Psort location CytoplasmicMembrane, score	0.923	0.769	0.833	1
K16951	Iron-sulfur cluster binding domain of dihydroorotate dehydrogenase B	0.769	0.846	1	0.5
K17686	Heavy metal transport detoxification protein	0.769	0.923	0.667	0.5
K17734	Belongs to the peptidase S8 family	0.615	0.846	0.833	0.5
K17758	Bifunctional enzyme that catalyzes the epimerization of the S- and R-forms of NAD(P)HX and the dehydration of the S-form of NAD(P)HX at the expense of ADP, which is converted to AMP. This allows the repair of both epimers of NAD(P)HX, a damaged form of NAD(P)H that is a result of enzymatic or heat-dependent hydration	0.769	1	1	0.5
K17759	Bifunctional enzyme that catalyzes the epimerization of the S- and R-forms of NAD(P)HX and the dehydration of the S-form of NAD(P)HX at the expense of ADP, which is converted to AMP. This allows the repair of both epimers of NAD(P)HX, a damaged form of NAD(P)H that is a result of enzymatic or heat-dependent hydration	0.769	1	1	0.5
K17828	Belongs to the dihydroorotate dehydrogenase family. Type 1 subfamily	0.846	1	1	0.5
K18682	Endoribonuclease that initiates mRNA decay	0.923	0.846	1	0.5
K19221	ATP corrinoid adenosyltransferase BtuR CobO CobP	0.923	0.923	1	1
K19224	NlpC/P60 family	0.769	0.923	1	0.5
K19405	Catalyzes the specific phosphorylation of arginine residues in proteins	0.923	0.769	0.833	0.5
K19710	Scavenger mRNA decapping enzyme C-term binding	0.769	0.846	0.833	0.5
K20074	PFAM Protein phosphatase 2C	0.846	0.923	1	0.5
K20201	Low molecular weight phosphotyrosine protein phosphatase	0.692	0.923	1	1
K21071	Catalyzes the phosphorylation of D-fructose 6-phosphate to fructose 1,6-bisphosphate by ATP, the first committing step of glycolysis	0.769	0.923	1	0.5
K21471	NlpC/P60 family	0.923	1	1	0.5
K21636	TIGRFAM anaerobic ribonucleoside-triphosphate reductase	0.769	0.846	1	1
K21929	TIGRFAM Phage SPO1 DNA polymerase-related protein	0.769	0.846	1	0.5
K22010	response regulator receiver	0.846	0.846	1	0.5
K22044	Mechanosensitive ion channel	0.769	0.615	1	0.5
K22224	ATP-grasp domain	0.923	0.923	1	1
K22305	Belongs to the phosphoglycerate mutase family	0.846	0.769	1	1
K22432	electron transfer flavoprotein, alpha subunit	0.692	0.846	0.5	1
